# Supplementary material for: 9-BBN and chloride catalyzed reduction of chlorophosphines to phosphines and diphosphines
Source: Royal Society of Chemistry journal article supplement (doi:10.1039/d1cc06439h), 2022-01-01
Supplement: d1cc06439h1.pdf [file d1cc06439h1.pdf]

## Supporting Information for: 9-BBN and Chloride Catalyzed Reduction of Chlorophosphines to Phosphines and Diphosphines

Iris Elser, Ryan J. Andrews and Douglas W. Stephan

|                                                                                                                                                                                                                       |    |
|-----------------------------------------------------------------------------------------------------------------------------------------------------------------------------------------------------------------------|----|
| 1. General .....                                                                                                                                                                                                      | 8  |
| 2. Catalysis .....                                                                                                                                                                                                    | 9  |
| 2.1 9-BBN catalyzed reactions .....                                                                                                                                                                                   | 9  |
| Figure S 1: <sup>31</sup> P NMR spectrum of 9-BBN catalyzed reaction of Ph <sub>2</sub> PCl with Et <sub>3</sub> SiH (60°C, 1,2-DCE, after 18 hours). .....                                                           | 10 |
| Figure S 2: <sup>31</sup> P NMR spectrum of 9-BBN catalyzed reaction of Ph <sub>2</sub> PCl with Et <sub>3</sub> SiH (60°C, oDFB, after 72 hours). .....                                                              | 10 |
| Figure S 3: <sup>31</sup> P NMR spectrum of reaction of Ph <sub>2</sub> PCl with Et <sub>3</sub> SiH (60°C, oDFB, after 7 hours). No 9-BBN was added. ....                                                            | 11 |
| Figure S 4: <sup>31</sup> P NMR spectrum of 9-BBN catalyzed reaction of Ph <sub>2</sub> PCl with Et <sub>3</sub> SiH (rt, oDFB, after 7 hours). .....                                                                 | 11 |
| Figure S 5: <sup>31</sup> P NMR spectrum of 9-BBN catalyzed reaction of Ph <sub>2</sub> PCl with Et <sub>3</sub> SiH (100°C, oDCB, after 18 hours). .....                                                             | 12 |
| Figure S 6: <sup>31</sup> P NMR spectrum of 9-BBN catalyzed reaction of Ph <sub>2</sub> PCl with Et <sub>3</sub> SiH (80°C, oDCB, after 96 hours). .....                                                              | 12 |
| Figure S 7: <sup>31</sup> P NMR spectrum of 9-BBN catalyzed reaction of Ph <sub>2</sub> PCl with PhSiH <sub>3</sub> (70°C, 1,2-DCE, after 30 hours). .....                                                            | 13 |
| Figure S 8: <sup>31</sup> P NMR spectrum of 9-BBN catalyzed reaction of Ph <sub>2</sub> PCl with Et <sub>3</sub> SiH (70°C, 1,2-DCE, after 54 hours). 10 mol% 9-BBN used. ....                                        | 13 |
| Figure S 9: <sup>31</sup> P NMR spectrum of 9-BBN catalyzed reaction of Ph <sub>2</sub> PCl with Et <sub>3</sub> SiH (60°C, 1,2-DCE, after 8 hours). 10 mol% 9-BBN used. ....                                         | 14 |
| Figure S 10: <sup>31</sup> P NMR spectrum of 9-BBN catalyzed reaction of Ph <sub>2</sub> PCl with PhSiH <sub>3</sub> (60°C, 1,2-DCE, after 30 hours). ....                                                            | 14 |
| Figure S 11: <sup>31</sup> P NMR spectrum of 9-BBN catalyzed reaction of Ph <sub>2</sub> PCl with Ph <sub>2</sub> ClSiH (60°C, 1,2-DCE, after 48 hours). ....                                                         | 15 |
| Figure S 12: <sup>31</sup> P NMR spectrum of 9-BBN catalyzed reaction of Ph <sub>2</sub> PCl with PhSiH <sub>3</sub> (30°C, 1,2-DCE, after 24 hours). ....                                                            | 15 |
| Figure S 13: <sup>31</sup> P NMR spectrum of 9-BBN catalyzed reaction of Ph <sub>2</sub> PCl with Et <sub>3</sub> SiH (60°C, 1,2-DCE, after 30 hours). Reaction was kept under static vacuum (freeze pump thaw). .... | 16 |
| Figure S 14: <sup>31</sup> P NMR spectrum of 9-BBN catalyzed reaction of Ph <sub>2</sub> PCl with PhSiH <sub>3</sub> (30°C, 1,2-DCE, after 10 hours). 1.2 equiv of PhSiH <sub>3</sub> were used. ....                 | 16 |
| Figure S 15: <sup>31</sup> P NMR spectrum of 9-BBN catalyzed reaction of Ph <sub>2</sub> PCl with PhSiH <sub>3</sub> (30°C, 1,2-DCE, after 10 hours). 1.4 equiv of PhSiH <sub>3</sub> were used. ....                 | 17 |
| Figure S 16: <sup>31</sup> P NMR spectrum of 9-BBN catalyzed reaction of Ph <sub>2</sub> PCl with PhSiH <sub>3</sub> (30°C, 1,2-DCE, after 10 hours). 1.6 equiv of PhSiH <sub>3</sub> were used. ....                 | 17 |

|                                                                                                                                                                   |    |
|-------------------------------------------------------------------------------------------------------------------------------------------------------------------|----|
| Figure S 17: $^{31}\text{P}$ NMR spectrum of 9-BBN catalyzed reaction of $\text{Ph}_2\text{PCl}$ with $\text{PhSiH}_3$ (30°C, MeCN, after 20 hours). .....        | 18 |
| Figure S 18: $^{31}\text{P}$ NMR spectrum of 9-BBN catalyzed reaction of $\text{Ph}_2\text{PCl}$ with $\text{PhSiH}_3$ (30°C, oDFB, after 10 hours). .....        | 18 |
| Figure S 19: $^{31}\text{P}$ NMR spectrum of reaction of $\text{Ph}_2\text{PCl}$ with $\text{PhSiH}_3$ (30°C, MeCN, after 24 hours). No 9-BBN used. ....          | 19 |
| Figure S 20: $^{31}\text{P}$ NMR spectrum of 9-BBN catalyzed reaction of $\text{Ph}_2\text{PCl}$ with $\text{PhSiH}_3$ (50°C, MeCN, after 8 hours). .....         | 19 |
| Figure S 21: $^{31}\text{P}$ NMR spectrum of 9-BBN catalyzed reaction of $\text{Ph}_2\text{PCl}$ with $\text{Et}_3\text{SiH}$ (60°C, MeCN, after 32 hours). ..... | 20 |
| Figure S 22: $^{31}\text{P}$ NMR spectrum of reaction of $\text{Ph}_2\text{PCl}$ with $\text{PhSiH}_3$ (60°C, 1,2-DCE, after 32 hours). No 9-BBN used. ....       | 20 |
| Figure S 23: $^{31}\text{P}$ NMR spectrum of 9-BBN catalyzed reaction of $\text{Ph}_2\text{PCl}$ with $\text{PhSiH}_3$ (30°C, MeCN/oDFB, after 20 hours).....     | 21 |
| Figure S 24: $^{31}\text{P}$ NMR spectrum of 9-BBN catalyzed reaction of $i\text{Pr}_2\text{PCl}$ with $\text{PhSiH}_3$ (30°C, MeCN, after 20 hours). .....       | 23 |
| Figure S 25: $^{31}\text{P}$ NMR spectrum of 9-BBN catalyzed reaction of $i\text{Pr}_2\text{PCl}$ with $\text{PhSiH}_3$ (30°C, oDFB/MeCN, after 42 hours).....    | 23 |
| Figure S 26: $^{31}\text{P}$ NMR spectrum of reaction of $i\text{Pr}_2\text{PCl}$ with $\text{PhSiH}_3$ (60°C, oDFB/MeCN, after 12 hours). No 9-BBN used. ....    | 24 |
| Figure S 27: $^{31}\text{P}$ NMR spectrum of 9-BBN catalyzed reaction of $i\text{Pr}_2\text{PCl}$ with $\text{PhSiH}_3$ (60°C, oDFB/MeCN, after 8 hours).....     | 24 |
| Figure S 28: $^{31}\text{P}$ NMR spectrum of 9-BBN catalyzed reaction of $t\text{Bu}_2\text{PCl}$ with $\text{PhSiH}_3$ (30°C, oDFB/MeCN, after 8 days).....      | 25 |
| Figure S 29: $^{31}\text{P}$ NMR spectrum of 9-BBN catalyzed reaction of $t\text{Bu}_2\text{PCl}$ with $\text{PhSiH}_3$ (60°C, oDFB/MeCN, after 48 hours).....    | 25 |
| Figure S 30: $^{31}\text{P}$ NMR spectrum of 9-BBN catalyzed reaction of $t\text{Bu}_2\text{PCl}$ with $\text{PhSiH}_3$ (80°C, oDFB/MeCN, after 5 days).....      | 26 |
| Figure S 31: $^{31}\text{P}$ NMR spectrum of 9-BBN catalyzed reaction of $\text{Cy}_2\text{PCl}$ with $\text{PhSiH}_3$ (30°C, MeCN/oDFB, after 38 hours).....     | 26 |
| Figure S 32: $^{31}\text{P}$ NMR spectrum of 9-BBN catalyzed reaction of $\text{Cy}_2\text{PCl}$ with $\text{PhSiH}_3$ (60°C, MeCN/oDFB, after 8 hours).....      | 27 |
| Figure S 33: $^{31}\text{P}$ NMR spectrum of 9-BBN catalyzed reaction of $t\text{BuPhPCl}$ with $\text{PhSiH}_3$ (30°C, MeCN/oDFB, after 42 hours).....           | 27 |
| Figure S 34: $^{31}\text{P}$ NMR spectrum of 9-BBN catalyzed reaction of $t\text{BuPhPCl}$ with $\text{PhSiH}_3$ (60°C, MeCN/oDFB, after 48 hours).....           | 28 |
| Figure S 35: $^{31}\text{P}$ NMR spectrum of 9-BBN catalyzed reaction of $t\text{BuPhPCl}$ with $\text{PhSiH}_3$ (80°C, MeCN/oDFB, after 24 hours).....           | 28 |
| Figure S 36: $^{31}\text{P}$ NMR spectrum of 9-BBN catalyzed reaction of $\text{Mes}_2\text{PCl}$ with $\text{PhSiH}_3$ (30°C, MeCN/oDFB, after 24 hours).....    | 29 |

|                                                                                                                                                                                                                                       |    |
|---------------------------------------------------------------------------------------------------------------------------------------------------------------------------------------------------------------------------------------|----|
| Figure S 37: $^{31}\text{P}$ NMR spectrum of 9-BBN catalyzed reaction of ( <i>o</i> -OMeC <sub>6</sub> H <sub>4</sub> ) <sub>2</sub> PCl with PhSiH <sub>3</sub> (30°C, MeCN/ <i>o</i> DFB, after 10 hours).....                      | 29 |
| Figure S 38: $^{31}\text{P}$ NMR spectrum of 9-BBN catalyzed reaction of (MeC <sub>6</sub> H <sub>4</sub> ) <sub>2</sub> PCl with PhSiH <sub>3</sub> (30°C, MeCN/ <i>o</i> DFB, after 7 hours).....                                   | 30 |
| Figure S 39: $^{31}\text{P}$ NMR spectrum of 9-BBN catalyzed reaction of ( <i>p</i> -FC <sub>6</sub> H <sub>4</sub> ) <sub>2</sub> PCl with PhSiH <sub>3</sub> (30°C, MeCN/ <i>o</i> DFB, after 20 hours).....                        | 30 |
| Figure S 40: $^{31}\text{P}$ NMR spectrum of 9-BBN catalyzed reaction of ( <i>p</i> -CF <sub>3</sub> C <sub>6</sub> H <sub>4</sub> ) <sub>2</sub> PCl with PhSiH <sub>3</sub> (30°C, MeCN/ <i>o</i> DFB, after 20 hours).....         | 31 |
| Figure S 41: $^{31}\text{P}$ NMR spectrum of 9-BBN catalyzed reaction of (3,5-(CF <sub>3</sub> ) <sub>2</sub> C <sub>6</sub> H <sub>3</sub> ) <sub>2</sub> PCl with PhSiH <sub>3</sub> (30°C, MeCN/ <i>o</i> DFB, after 6 hours)..... | 31 |
| Figure S 42: $^{31}\text{P}$ NMR spectrum of 9-BBN catalyzed reaction of PhPCl <sub>2</sub> with PhSiH <sub>3</sub> (30°C, MeCN/ <i>o</i> DFB, after 48 hours).....                                                                   | 32 |
| 2.2 Lewis base ([Et <sub>4</sub> N]Cl) catalyzed reactions.....                                                                                                                                                                       | 32 |
| Figure S 43: $^{31}\text{P}$ NMR spectrum of [ <i>n</i> Bu <sub>4</sub> N][Cl] catalyzed reaction of Ph <sub>2</sub> PCl with PhSiH <sub>3</sub> (30°C, <i>o</i> DFB/MeCN, after 3 hours).....                                        | 33 |
| Figure S 44: $^{31}\text{P}$ NMR spectrum of [Et <sub>4</sub> N]Cl catalyzed reaction of Ph <sub>2</sub> PCl with PhSiH <sub>3</sub> (30°C, <i>o</i> DFB/MeCN, after 2 hours).....                                                    | 33 |
| Figure S 45: $^{31}\text{P}$ NMR spectrum of LiCl catalyzed reaction of Ph <sub>2</sub> PCl with PhSiH <sub>3</sub> (30°C, <i>o</i> DFB/MeCN, after 24 hours).....                                                                    | 34 |
| Figure S 46: $^{31}\text{P}$ NMR spectrum of LiCl catalyzed reaction of Ph <sub>2</sub> PCl with PhSiH <sub>3</sub> and 12-crown-4 (30°C, <i>o</i> DFB/MeCN, after 24 hours).....                                                     | 34 |
| Figure S 47: $^{31}\text{P}$ NMR spectrum of KCl catalyzed reaction of Ph <sub>2</sub> PCl with PhSiH <sub>3</sub> (30°C, <i>o</i> DFB/MeCN, after 24 hours).....                                                                     | 35 |
| Figure S 48: $^{31}\text{P}$ NMR spectrum of CaCl <sub>2</sub> catalyzed reaction of Ph <sub>2</sub> PCl with PhSiH <sub>3</sub> (30°C, <i>o</i> DFB/MeCN, after 24 hours).....                                                       | 35 |
| Figure S 49: $^{31}\text{P}$ NMR spectrum of [ <i>n</i> Bu <sub>4</sub> N][Br] catalyzed reaction of Ph <sub>2</sub> PCl with PhSiH <sub>3</sub> (30°C, <i>o</i> DFB/MeCN, after 16 hours).....                                       | 36 |
| Figure S 50: $^{31}\text{P}$ NMR spectrum of [ <i>n</i> Bu <sub>4</sub> N][SiF <sub>2</sub> Ph <sub>3</sub> ] catalyzed reaction of Ph <sub>2</sub> PCl with PhSiH <sub>3</sub> (30°C, <i>o</i> DFB/MeCN, after 2 hours).....         | 36 |
| Figure S 51: $^{31}\text{P}$ NMR spectrum of DBU catalyzed reaction of Ph <sub>2</sub> PCl with PhSiH <sub>3</sub> (30°C, <i>o</i> DFB/MeCN, after 16 hours).....                                                                     | 37 |
| Figure S 52: $^{31}\text{P}$ NMR spectrum of DBU catalyzed reaction of Ph <sub>2</sub> PCl with PhSiH <sub>3</sub> (30°C, <i>o</i> DFB/MeCN, after 2 hours).....                                                                      | 37 |
| Figure S 53: $^{31}\text{P}$ NMR spectrum of [ <i>n</i> Bu <sub>4</sub> N][Cl] catalyzed reaction of Ph <sub>2</sub> PCl with Ph <sub>3</sub> SiH (30°C, <i>o</i> DFB/MeCN, after 24 hours).....                                      | 38 |
| Figure S 54: $^{31}\text{P}$ NMR spectrum of [ <i>n</i> Bu <sub>4</sub> N][Cl] catalyzed reaction of Ph <sub>2</sub> PCl with HMe <sub>2</sub> SiOSiMe <sub>2</sub> H (30°C, <i>o</i> DFB/MeCN, after 16 hours).....                  | 39 |
| Figure S 55: $^{31}\text{P}$ NMR spectrum of [ <i>n</i> Bu <sub>4</sub> N][Cl] catalyzed reaction of Ph <sub>2</sub> PCl with Et <sub>3</sub> SiH (30°C, <i>o</i> DFB/MeCN, after 24 hours).....                                      | 39 |
| Figure S 56: $^{31}\text{P}$ NMR spectrum of [ <i>n</i> Bu <sub>4</sub> N][Cl] catalyzed reaction of Ph <sub>2</sub> PCl with <i>i</i> Pr <sub>3</sub> SiH (30°C, <i>o</i> DFB/MeCN, after 16 hours).....                             | 40 |

|                                                                                                                                                                                                                                     |    |
|-------------------------------------------------------------------------------------------------------------------------------------------------------------------------------------------------------------------------------------|----|
| Figure S 57: <sup>31</sup> P NMR spectrum of [Et <sub>4</sub> N]Cl catalyzed reaction of Ph <sub>2</sub> PCl with PhSiH <sub>3</sub> (30°C, oDFB, after 2 hours).....                                                               | 41 |
| Figure S 58: <sup>31</sup> P NMR spectrum of [Et <sub>4</sub> N]Cl catalyzed reaction of Ph <sub>2</sub> PCl with PhSiH <sub>3</sub> (30°C, MeCN, after 2 hours).....                                                               | 41 |
| Figure S 59: <sup>31</sup> P NMR spectrum of [Et <sub>4</sub> N]Cl catalyzed reaction of Ph <sub>2</sub> PCl with PhSiH <sub>3</sub> (30°C, toluene, after 2 hours).....                                                            | 42 |
| Figure S 60: <sup>31</sup> P NMR spectrum of [Et <sub>4</sub> N]Cl catalyzed reaction of Cy <sub>2</sub> PCl with PhSiH <sub>3</sub> (60°C, oDFB/MeCN, after 13 hours).....                                                         | 44 |
| Figure S 61: <sup>31</sup> P NMR spectrum of [Et <sub>4</sub> N]Cl catalyzed reaction of tBu <sub>2</sub> PCl with PhSiH <sub>3</sub> (80°C, oDFB/MeCN, after 15 hours).....                                                        | 44 |
| Figure S 62: <sup>31</sup> P NMR spectrum of [Et <sub>4</sub> N]Cl catalyzed reaction of (Ph)(tBu)PCl with PhSiH <sub>3</sub> (80°C, oDFB/MeCN, after 15 hours).....                                                                | 45 |
| Figure S 63: <sup>31</sup> P NMR spectrum of [Et <sub>4</sub> N]Cl catalyzed reaction of ( <i>o</i> -OMeC <sub>6</sub> H <sub>4</sub> ) <sub>2</sub> PCl with PhSiH <sub>3</sub> (60°C, oDFB/MeCN, after 3 hours).....              | 45 |
| Figure S 64: <sup>31</sup> P NMR spectrum of [Et <sub>4</sub> N]Cl catalyzed reaction of ( <i>o</i> -OMeC <sub>6</sub> H <sub>4</sub> ) <sub>2</sub> PCl with PhSiH <sub>3</sub> (60°C, oDFB/MeCN, after 15 hours).....             | 46 |
| Figure S 65: <sup>31</sup> P NMR spectrum of [Et <sub>4</sub> N]Cl catalyzed reaction of ( <i>o</i> -OMeC <sub>6</sub> H <sub>4</sub> ) <sub>2</sub> PCl with PhSiH <sub>3</sub> (60°C, oDFB/MeCN, after 19 hours).....             | 46 |
| Figure S 66: <sup>31</sup> P NMR spectrum of [Et <sub>4</sub> N]Cl catalyzed reaction of ( <i>o</i> -OMeC <sub>6</sub> H <sub>4</sub> ) <sub>2</sub> PCl with PhSiH <sub>3</sub> (30°C, oDFB/MeCN, after 2 hours).....              | 47 |
| Figure S 67: <sup>31</sup> P NMR spectrum of [Et <sub>4</sub> N]Cl catalyzed reaction of ( <i>o</i> -OMeC <sub>6</sub> H <sub>4</sub> ) <sub>2</sub> PCl with PhSiH <sub>3</sub> (30°C, oDFB/MeCN, after 21 hours).....             | 47 |
| Figure S 68: <sup>31</sup> P NMR spectrum of [Et <sub>4</sub> N]Cl catalyzed reaction of ( <i>o</i> -MeC <sub>6</sub> H <sub>4</sub> ) <sub>2</sub> PCl with PhSiH <sub>3</sub> (30°C, oDFB/MeCN, after 23 hours).....              | 48 |
| Figure S 69: <sup>31</sup> P NMR spectrum of [Et <sub>4</sub> N]Cl catalyzed reaction of ( <i>o</i> -MeC <sub>6</sub> H <sub>4</sub> ) <sub>2</sub> PCl with PhSiH <sub>3</sub> (60°C, oDFB/MeCN, after 3 hours).....               | 48 |
| Figure S 70: <sup>31</sup> P NMR spectrum of [Et <sub>4</sub> N]Cl catalyzed reaction of ( <i>o</i> -MeC <sub>6</sub> H <sub>4</sub> ) <sub>2</sub> PCl with PhSiH <sub>3</sub> (60°C, oDFB/MeCN, after 15 hours).....              | 49 |
| Figure S 71: <sup>31</sup> P NMR spectrum of [Et <sub>4</sub> N]Cl catalyzed reaction of (Mes) <sub>2</sub> PCl with PhSiH <sub>3</sub> (60°C, oDFB/MeCN, after 15 hours).....                                                      | 49 |
| Figure S 72: <sup>31</sup> P NMR spectrum of [Et <sub>4</sub> N]Cl catalyzed reaction of (Mes) <sub>2</sub> PCl with PhSiH <sub>3</sub> (60°C, oDFB/MeCN, after 18 hours).....                                                      | 50 |
| Figure S 73: <sup>31</sup> P NMR spectrum of [Et <sub>4</sub> N]Cl catalyzed reaction of (Mes) <sub>2</sub> PCl with PhSiH <sub>3</sub> (60°C, oDFB/MeCN, after 23 hours).....                                                      | 50 |
| Figure S 74: <sup>31</sup> P NMR spectrum of [Et <sub>4</sub> N]Cl catalyzed reaction of ( <i>p</i> -FC <sub>6</sub> H <sub>4</sub> ) <sub>2</sub> PCl with PhSiH <sub>3</sub> (30°C, oDFB/MeCN, after 2 hours).....                | 51 |
| Figure S 75: <sup>31</sup> P NMR spectrum of [Et <sub>4</sub> N]Cl catalyzed reaction of ( <i>p</i> -FC <sub>6</sub> H <sub>4</sub> ) <sub>2</sub> PCl with PhSiH <sub>3</sub> (60°C, oDFB/MeCN, after 3 hours).....                | 51 |
| Figure S 76: <sup>31</sup> P NMR spectrum of [Et <sub>4</sub> N]Cl catalyzed reaction of ( <i>p</i> -CF <sub>3</sub> C <sub>6</sub> H <sub>4</sub> ) <sub>2</sub> PCl with PhSiH <sub>3</sub> (30°C, oDFB/MeCN, after 2 hours)..... | 52 |

|                                                                                                                                                                                                                                                                                    |    |
|------------------------------------------------------------------------------------------------------------------------------------------------------------------------------------------------------------------------------------------------------------------------------------|----|
| Figure S 77: $^{31}\text{P}$ NMR spectrum of $[\text{Et}_4\text{N}]\text{Cl}$ catalyzed reaction of $(p\text{-CF}_3\text{C}_6\text{H}_4)_2\text{PCl}$ with $\text{PhSiH}_3$ (60°C, <i>o</i> DFB/MeCN, after 3 hours).....                                                          | 52 |
| Figure S 78: $^{31}\text{P}$ NMR spectrum of $[\text{Et}_4\text{N}]\text{Cl}$ catalyzed reaction of $(3,5\text{-(CF}_3)_2\text{C}_6\text{H}_3)_2\text{PCl}$ with $\text{PhSiH}_3$ (30°C, <i>o</i> DFB/MeCN, after 2 hours). .....                                                  | 53 |
| Figure S 79: $^{31}\text{P}$ NMR spectrum of $[\text{Et}_4\text{N}]\text{Cl}$ catalyzed reaction of $(3,5\text{-(CF}_3)_2\text{C}_6\text{H}_3)_2\text{PCl}$ with $\text{PhSiH}_3$ (60°C, <i>o</i> DFB/MeCN, after 2 hours). .....                                                  | 53 |
| Figure S 80: $^{31}\text{P}$ NMR spectrum of $[\text{Et}_4\text{N}]\text{Cl}$ catalyzed reaction of $\text{PhPCl}_2$ with $\text{PhSiH}_3$ (30°C, <i>o</i> DFB/MeCN, after 2 hours).....                                                                                           | 54 |
| 2.3 Two-component catalysis with 9-BBN and $[\text{Et}_4\text{N}]\text{Cl}$ .....                                                                                                                                                                                                  | 54 |
| Figure S 81: $^{31}\text{P}$ NMR spectrum of $[\text{Et}_4\text{N}]\text{Cl}$ /9-BBN catalyzed reaction of $\text{Ph}_2\text{PCl}$ with $\text{PhSiH}_3$ (30°C, <i>o</i> DFB/MeCN, after 2 hours).....                                                                             | 55 |
| Figure S 82: $^{31}\text{P}$ NMR spectrum of $[\text{Et}_4\text{N}]\text{Cl}$ /9-BBN catalyzed reaction of <i>i</i> Pr $_2\text{PCl}$ with $\text{PhSiH}_3$ (30°C, <i>o</i> DFB/MeCN, after 2 hours).....                                                                          | 56 |
| Figure S 83: $^{31}\text{P}$ NMR spectrum of $[\text{Et}_4\text{N}]\text{Cl}$ /9-BBN catalyzed reaction of <i>t</i> Bu $_2\text{PCl}$ with $\text{PhSiH}_3$ (80°C, <i>o</i> DFB/MeCN, after 5 days).....                                                                           | 56 |
| Figure S 84: $^{31}\text{P}$ NMR spectrum of $[\text{Et}_4\text{N}]\text{Cl}$ /9-BBN catalyzed reaction of $(o\text{-OMeC}_6\text{H}_4)_2\text{PCl}$ with $\text{PhSiH}_3$ (30°C, <i>o</i> DFB/MeCN, after 2 hours).....                                                           | 57 |
| Figure S 85: $^{31}\text{P}$ NMR spectrum of $[\text{Et}_4\text{N}]\text{Cl}$ /9-BBN catalyzed reaction of $(o\text{-MeC}_6\text{H}_4)_2\text{PCl}$ with $\text{PhSiH}_3$ (30°C, reaction run in <i>o</i> DFB/MeCN, NMR measured in $\text{C}_6\text{D}_6$ , after 2 hours). ..... | 57 |
| Figure S 86: $^{31}\text{P}$ NMR spectrum of $[\text{Et}_4\text{N}]\text{Cl}$ 9-BBN catalyzed reaction of $(\text{Mes})_2\text{PCl}$ with $\text{PhSiH}_3$ (30°C, <i>o</i> DFB/MeCN, after 2 hours).....                                                                           | 58 |
| Figure S 87: $^{31}\text{P}$ NMR spectrum of $[\text{Et}_4\text{N}]\text{Cl}$ /9-BBN catalyzed reaction of $(t\text{Bu})(\text{Ph})\text{PCl}$ with $\text{PhSiH}_3$ (60°C, <i>o</i> DFB/MeCN, after 8 hours). .....                                                               | 58 |
| Figure S 88: $^{31}\text{P}$ NMR spectrum of $[\text{Et}_4\text{N}]\text{Cl}$ /9-BBN catalyzed reaction of $(t\text{Bu})(\text{Ph})\text{PCl}$ with $\text{PhSiH}_3$ (30°C, <i>o</i> DFB/MeCN, after 72 hours). .....                                                              | 59 |
| Figure S 89: $^{31}\text{P}$ NMR spectrum of $[\text{Et}_4\text{N}]\text{Cl}$ /9-BBN catalyzed reaction of $(3,5\text{-(CF}_3)_2\text{C}_6\text{H}_3)_2\text{PCl}$ with $\text{PhSiH}_3$ (30°C, <i>o</i> DFB/MeCN, after 2 hours).....                                             | 59 |
| Figure S 90: $^{31}\text{P}$ NMR spectrum of $[\text{Et}_4\text{N}]\text{Cl}$ /9-BBN catalyzed reaction of $(p\text{-FC}_6\text{H}_4)_2\text{PCl}$ with $\text{PhSiH}_3$ (30°C, <i>o</i> DFB/MeCN, after 2 hours). .....                                                           | 60 |
| Figure S 91: $^{31}\text{P}$ NMR spectrum of $[\text{Et}_4\text{N}]\text{Cl}$ /9-BBN catalyzed reaction of $(p\text{-CF}_3\text{C}_6\text{H}_4)_2\text{PCl}$ with $\text{PhSiH}_3$ (30°C, <i>o</i> DFB/MeCN, after 2 hours). .....                                                 | 60 |
| Figure S 92: $^{31}\text{P}$ NMR spectrum of $[\text{Et}_4\text{N}]\text{Cl}$ /9-BBN catalyzed reaction of $\text{PhPCl}_2$ with $\text{PhSiH}_3$ (30°C, <i>o</i> DFB/MeCN, after 2 hours).....                                                                                    | 61 |
| Figure S 93: $^{31}\text{P}\{^1\text{H}\}$ NMR spectrum of $[\text{Et}_4\text{N}]\text{Cl}$ /9-BBN catalyzed reaction of $(2,4,6\text{-(CF}_3)_3\text{C}_6\text{H}_4)\text{PCl}_2$ with $\text{PhSiH}_3$ (30°C, <i>o</i> DFB/MeCN, after 4 hours). .....                           | 61 |
| Figure S 94: $^{31}\text{P}$ NMR spectrum of $[\text{Et}_4\text{N}]\text{Cl}$ /9-BBN catalyzed reaction of $(2,4,6\text{-(CF}_3)_3\text{C}_6\text{H}_4)\text{PCl}_2$ with $\text{PhSiH}_3$ (30°C, <i>o</i> DFB/MeCN, after 4 hours).....                                           | 62 |
| Figure S 95: $^{31}\text{P}$ NMR spectrum of $[\text{Et}_4\text{N}]\text{Cl}$ /9-BBN catalyzed reaction of $(o\text{-NMe}_2\text{C}_6\text{H}_4)_2\text{PCl}$ with $\text{PhSiH}_3$ (30°C, <i>o</i> DFB/MeCN, after 4 hours).....                                                  | 62 |
| Figure S 96: $^{31}\text{P}$ NMR spectrum of $[\text{Et}_4\text{N}]\text{Cl}$ /9-BBN catalyzed reaction of $(m\text{-MeC}_6\text{H}_4)_2\text{PCl}$ with $\text{PhSiH}_3$ (30°C, <i>o</i> DFB/MeCN, after 2 hours). .....                                                          | 63 |

|                                                                                                                                                                                                                                                                                                                     |    |
|---------------------------------------------------------------------------------------------------------------------------------------------------------------------------------------------------------------------------------------------------------------------------------------------------------------------|----|
| Figure S 97: <sup>31</sup> P NMR spectrum of [Et <sub>4</sub> N]Cl /9-BBN catalyzed reaction of ( <i>p</i> -ClC <sub>6</sub> H <sub>4</sub> ) <sub>2</sub> PCl with PhSiH <sub>3</sub> (30°C, <i>o</i> DFB/MeCN, after 2 hours). .....                                                                              | 63 |
| 3. Mechanistic investigations .....                                                                                                                                                                                                                                                                                 | 63 |
| 3.1 Reaction of 9-BBN with Ph <sub>2</sub> PCl .....                                                                                                                                                                                                                                                                | 64 |
| Figure S 98: <sup>1</sup> H NMR spectrum of dynamic adduct of Ph <sub>2</sub> PH and Cl-9-BBN (CDCl <sub>3</sub> ).....                                                                                                                                                                                             | 64 |
| Figure S 99: <sup>31</sup> P NMR spectrum of dynamic adduct of Ph <sub>2</sub> PH and Cl-9-BBN (CDCl <sub>3</sub> ).....                                                                                                                                                                                            | 65 |
| Figure S 100: <sup>11</sup> B NMR spectrum of dynamic adduct of Ph <sub>2</sub> PH and Cl-9-BBN (CDCl <sub>3</sub> ).....                                                                                                                                                                                           | 65 |
| Figure S 101: <sup>13</sup> C NMR spectrum of dynamic adduct of Ph <sub>2</sub> PH and Cl-9-BBN (CDCl <sub>3</sub> ).....                                                                                                                                                                                           | 66 |
| 3.2 Reaction of Cl-9-BBN with PhSiH <sub>3</sub> .....                                                                                                                                                                                                                                                              | 66 |
| Figure S 102: <sup>11</sup> B NMR spectrum of reaction of Cl-9-BBN with PhSiH <sub>3</sub> in <i>o</i> DFB after 30 minutes at 30°C. 9-OH-9-BBN stems from glove box atmosphere-related hydrolysis of Cl-9-BBN. ....                                                                                                | 67 |
| Figure S 103: <sup>11</sup> B NMR spectrum of reaction of Cl-9-BBN with PhSiH <sub>3</sub> in <i>o</i> DFB after 14 hours at 30°C. 9-OH-9-BBN stems from glove box atmosphere-related hydrolysis of Cl-9-BBN. ....                                                                                                  | 67 |
| Figure S 104: <sup>11</sup> B NMR spectrum of reaction of Cl-9-BBN with PhSiH <sub>3</sub> with [Et <sub>4</sub> N]Cl catalyst in <i>o</i> DFB after 10 minutes. 9-OH-9-BBN stems from glove box atmosphere-related hydrolysis of Cl-9-BBN... ..                                                                    | 68 |
| 3.3 Attempted dehydrogenative coupling of R <sub>2</sub> PH with 9-BBN and Cl-9-BBN.....                                                                                                                                                                                                                            | 68 |
| Figure S 105: <sup>31</sup> P{ <sup>1</sup> H} NMR spectrum of the attempted dehydrogenative coupling of Ph <sub>2</sub> PH with catalytic amounts of Cl-9-BBN in <i>o</i> DFB/MeCN at 30 °C after 16 hours. ....                                                                                                   | 69 |
| Figure S 106: <sup>31</sup> P{ <sup>1</sup> H} NMR spectrum of the addition of Ph <sub>2</sub> PCl to the reaction mixture of the attempted dehydrogenative coupling of Ph <sub>2</sub> PH with catalytic amounts of Cl-9-BBN in <i>o</i> DFB/MeCN at 30 °C; 30 min after the addition of Ph <sub>2</sub> PCl. .... | 69 |
| Figure S 107: <sup>31</sup> P NMR spectrum of attempted dehydrogenative coupling of Ph <sub>2</sub> PH with catalytic amounts of 9-BBN in <i>o</i> DFB/MeCN at 30 °C after 20 hours. ....                                                                                                                           | 70 |
| 3.4 Reaction of Ph <sub>2</sub> PH with Ph <sub>2</sub> PCl .....                                                                                                                                                                                                                                                   | 70 |
| Figure S 108: <sup>31</sup> P NMR spectrum of the reaction of Ph <sub>2</sub> PCl with Ph <sub>2</sub> PH at 30 °C in toluene after 3 hours.....                                                                                                                                                                    | 71 |
| Figure S 109: <sup>31</sup> P NMR spectrum of the reaction of Ph <sub>2</sub> PCl with Ph <sub>2</sub> PH at 30 °C in <i>o</i> DCB after 3 hours. ....                                                                                                                                                              | 71 |
| Figure S 110: <sup>31</sup> P NMR spectrum of the reaction of Ph <sub>2</sub> PCl with Ph <sub>2</sub> PH at 30 °C in <i>o</i> DFB after 3 hours. ....                                                                                                                                                              | 72 |
| Figure S 111: <sup>31</sup> P NMR spectrum of the reaction of Ph <sub>2</sub> PCl with Ph <sub>2</sub> PH at 30 °C in <i>o</i> DFB/MeCN after 3 hours.....                                                                                                                                                          | 72 |
| 3.5 Reaction of <i>t</i> Bu <sub>2</sub> PH with <i>t</i> Bu <sub>2</sub> PCl .....                                                                                                                                                                                                                                 | 72 |
| Figure S 112: <sup>31</sup> P NMR spectrum of reaction of <i>t</i> Bu <sub>2</sub> PCl with <i>t</i> Bu <sub>2</sub> PH in <i>o</i> DFB/MeCN after 24 h at 80 °C. ....                                                                                                                                              | 73 |
| Figure S 113: <sup>31</sup> P NMR spectrum of reaction of <i>t</i> Bu <sub>2</sub> PCl with <i>t</i> Bu <sub>2</sub> PH and PhSiH <sub>3</sub> in <i>o</i> DFB/MeCN after 48 h at 80 °C. ....                                                                                                                       | 73 |
| 3.6 Chlorination of PhSiH <sub>3</sub> with HCl.....                                                                                                                                                                                                                                                                | 73 |

|                                                                                                                                                                                                                                                                                                                     |    |
|---------------------------------------------------------------------------------------------------------------------------------------------------------------------------------------------------------------------------------------------------------------------------------------------------------------------|----|
| Figure S 114: $^1\text{H}$ NMR spectrum of reaction of $\text{PhSiH}_3$ with $\text{HCl}$ at $30\text{ }^\circ\text{C}$ in $\text{MeCN-d}_3$ after indicated time intervals. Zero sample: before addition of $\text{HCl}$ . Spectrum is magnified to facilitate recognition of important resonances. ....           | 74 |
| Figure S 115: $^1\text{H}$ NMR spectrum of reaction of $\text{PhSiH}_3$ with $\text{HCl}$ and 9-BBN at $30\text{ }^\circ\text{C}$ in $\text{MeCN-d}_3$ after indicated time intervals. Zero sample: before addition of $\text{HCl}$ . Spectrum is magnified to facilitate recognition of important resonances. .... | 75 |
| Figure S 116: $^1\text{H}$ NMR spectra of $[\text{Et}_4\text{N}]\text{Cl}$ catalyzed chlorination of $\text{PhSiH}_3$ with $\text{HCl}$ in $\text{MeCN-d}_3$ . <i>Bottom</i> : Before addition of $\text{HCl}$ . <i>Top</i> : Reaction mixture after 120 minutes at $30\text{ }^\circ\text{C}$ . ....               | 76 |
| 3.7 Test for radical mechanism .....                                                                                                                                                                                                                                                                                | 76 |
| Figure S 117: Stack of $^{31}\text{P}$ NMR spectra of the reaction of $\text{Ph}_2\text{PCI}$ with $\text{PhSiH}_3$ catalyzed by $[\text{Et}_4\text{N}]\text{Cl}$ in the presence of radical scavengers after 150 min. ....                                                                                         | 77 |
| Figure S 118: Stack of $^{31}\text{P}$ NMR spectra of the reaction of $\text{Ph}_2\text{PCI}$ with $\text{PhSiH}_3$ catalyzed by $[\text{Et}_4\text{N}]\text{Cl}$ in the presence of radical scavengers after 90 min. ....                                                                                          | 77 |
| Figure S 119: Stack of $^{31}\text{P}$ NMR spectra of the reaction of $\text{Ph}_2\text{PCI}$ with $\text{PhSiH}_3$ catalyzed by $[\text{Et}_4\text{N}]\text{Cl}$ in the presence of radical scavengers after 30 min. ....                                                                                          | 78 |
| 3.8 Test for silylium catalysis .....                                                                                                                                                                                                                                                                               | 78 |
| Figure S 120: $^{31}\text{P}$ NMR spectrum of the reaction of $\text{Ph}_2\text{PCI}$ with $\text{PhSiH}_3$ in the presence of $[\text{CPh}_3][\text{B}(\text{C}_6\text{F}_5)_4]$ ( $30\text{ }^\circ\text{C}$ , $o\text{DFB}/\text{MeCN}$ , 17 h). ....                                                            | 79 |
| Figure S 121: $^{31}\text{P}$ NMR spectrum of the reaction of $\text{Ph}_2\text{PCI}$ with $\text{PhSiH}_3$ in the presence of $[\text{CPh}_3][\text{B}(\text{C}_6\text{F}_5)_4]$ ( $30\text{ }^\circ\text{C}$ , $o\text{DFB}$ , 17 h). ....                                                                        | 79 |
| Figure S 122: $^{31}\text{P}$ NMR spectrum of the reaction of $\text{Ph}_2\text{PCI}$ with $\text{Et}_3\text{SiH}$ in the presence of $[\text{CPh}_3][\text{B}(\text{C}_6\text{F}_5)_4]$ ( $30\text{ }^\circ\text{C}$ , 1,2-dichloroethane, 3 h).....                                                               | 80 |
| 4. Larger scale reactions.....                                                                                                                                                                                                                                                                                      | 80 |
| 4.1 Synthesis of $\text{Ph}_4\text{P}_2$ by 9-BBN catalysis.....                                                                                                                                                                                                                                                    | 80 |
| Figure S 123: $^1\text{H}$ NMR spectrum of $\text{Ph}_4\text{P}_2$ synthesized from $\text{Ph}_2\text{PCI}$ and $\text{PhSiH}_3$ by 9-BBN catalysis ( $\text{C}_6\text{D}_6$ ). ....                                                                                                                                | 81 |
| Figure S 124: $^{31}\text{P}$ NMR spectrum of $\text{Ph}_4\text{P}_2$ synthesized from $\text{Ph}_2\text{PCI}$ and $\text{PhSiH}_3$ by 9-BBN catalysis ( $\text{C}_6\text{D}_6$ ). ....                                                                                                                             | 81 |
| Figure S 125: $^{13}\text{C}$ NMR spectrum of $\text{Ph}_4\text{P}_2$ synthesized from $\text{Ph}_2\text{PCI}$ and $\text{PhSiH}_3$ by 9-BBN catalysis ( $\text{C}_6\text{D}_6$ ). ....                                                                                                                             | 82 |
| 4.2 Synthesis of $(o\text{-MeC}_6\text{H}_4)_4\text{P}_2$ by 9-BBN/ $[\text{Et}_4\text{N}]\text{Cl}$ catalysis .....                                                                                                                                                                                                | 82 |
| Figure S 126: $^1\text{H}$ NMR spectrum of $(o\text{-MeC}_6\text{H}_4)_4\text{P}_2$ synthesized from $(o\text{-MeC}_6\text{H}_4)_2\text{PCI}$ and $\text{PhSiH}_3$ by 9-BBN/ $[\text{Et}_4\text{N}]\text{Cl}$ catalysis ( $\text{CDCl}_3$ ). ....                                                                   | 83 |
| Figure S 127: $^{31}\text{P}$ NMR spectrum of $(o\text{-MeC}_6\text{H}_4)_4\text{P}_2$ synthesized from $(o\text{-MeC}_6\text{H}_4)_2\text{PCI}$ and $\text{PhSiH}_3$ by 9-BBN/ $[\text{Et}_4\text{N}]\text{Cl}$ catalysis ( $\text{CDCl}_3$ ). ....                                                                | 83 |
| Figure S 128: $^{13}\text{C}$ NMR spectrum of $(o\text{-MeC}_6\text{H}_4)_4\text{P}_2$ synthesized from $(o\text{-MeC}_6\text{H}_4)_2\text{PCI}$ and $\text{PhSiH}_3$ by 9-BBN/ $[\text{Et}_4\text{N}]\text{Cl}$ catalysis ( $\text{CDCl}_3$ ). ....                                                                | 84 |
| 4.3 Synthesis of $(o\text{-NMe}_2\text{C}_6\text{H}_4)_4\text{P}_2$ by 9-BBN/ $[\text{Et}_4\text{N}]\text{Cl}$ catalysis .....                                                                                                                                                                                      | 84 |
| Figure S 129: $^1\text{H}$ NMR spectrum of $(o\text{-NMe}_2\text{C}_6\text{H}_4)_4\text{P}_2$ synthesized from $(o\text{-OMeC}_6\text{H}_4)_2\text{PCI}$ and $\text{PhSiH}_3$ by 9-BBN/ $[\text{Et}_4\text{N}]\text{Cl}$ catalysis ( $\text{CDCl}_3$ ). ....                                                        | 85 |

|                                                                                                                                                                                                                                                                       |    |
|-----------------------------------------------------------------------------------------------------------------------------------------------------------------------------------------------------------------------------------------------------------------------|----|
| Figure S 130: $^{31}\text{P}$ NMR spectrum of $(o\text{-NMe}_2\text{C}_6\text{H}_4)_4\text{P}_2$ synthesized from $(o\text{-OMeC}_6\text{H}_4)_2\text{PCl}$ and $\text{PhSiH}_3$ by 9-BBN/ $[\text{Et}_4\text{N}]\text{Cl}$ catalysis ( $\text{CDCl}_3$ ). .....      | 85 |
| Figure S 131: $^{13}\text{C}$ NMR spectrum of $(o\text{-NMe}_2\text{C}_6\text{H}_4)_4\text{P}_2$ synthesized from $(o\text{-OMeC}_6\text{H}_4)_2\text{PCl}$ and $\text{PhSiH}_3$ by 9-BBN/ $[\text{Et}_4\text{N}]\text{Cl}$ catalysis ( $\text{CDCl}_3$ ). .....      | 86 |
| 4.4 Synthesis of $(o\text{-OMeC}_6\text{H}_4)_4\text{P}_2$ by 9-BBN/ $[\text{Et}_4\text{N}]\text{Cl}$ catalysis.....                                                                                                                                                  | 86 |
| Figure S 132: $^1\text{H}$ NMR spectrum of $(o\text{-OMeC}_6\text{H}_4)_4\text{P}_2$ synthesized from $(o\text{-OMeC}_6\text{H}_4)_2\text{PCl}$ and $\text{PhSiH}_3$ by 9-BBN/ $[\text{Et}_4\text{N}]\text{Cl}$ catalysis ( $\text{CDCl}_3$ ). .....                  | 87 |
| Figure S 133: $^{31}\text{P}\{^1\text{H}\}$ NMR spectrum of $(o\text{-OMeC}_6\text{H}_4)_4\text{P}_2$ synthesized from $(o\text{-OMeC}_6\text{H}_4)_2\text{PCl}$ and $\text{PhSiH}_3$ by 9-BBN/ $[\text{Et}_4\text{N}]\text{Cl}$ catalysis ( $\text{CDCl}_3$ ). ..... | 87 |
| Figure S 134: $^{13}\text{C}$ NMR spectrum of $(o\text{-OMeC}_6\text{H}_4)_4\text{P}_2$ synthesized from $(o\text{-OMeC}_6\text{H}_4)_2\text{PCl}$ and $\text{PhSiH}_3$ by 9-BBN/ $[\text{Et}_4\text{N}]\text{Cl}$ catalysis ( $\text{CDCl}_3$ ). .....               | 88 |
| 4.5 Synthesis of $(2,4,6\text{-Me}_3\text{-C}_6\text{H}_2)_2\text{PH}$ by 9-BBN/ $[\text{Et}_4\text{N}]\text{Cl}$ catalysis.....                                                                                                                                      | 88 |
| Figure S 135: $^1\text{H}$ NMR spectrum of $\text{Mes}_2\text{PH}$ synthesized from $\text{Mes}_2\text{PCl}$ and $\text{PhSiH}_3$ by 9-BBN/ $[\text{Et}_4\text{N}]\text{Cl}$ catalysis ( $\text{C}_6\text{D}_6$ ). .....                                              | 89 |
| Figure S 136: $^{31}\text{P}$ NMR spectrum of $\text{Mes}_2\text{PH}$ synthesized from $\text{Mes}_2\text{PCl}$ and $\text{PhSiH}_3$ by 9-BBN/ $[\text{Et}_4\text{N}]\text{Cl}$ catalysis ( $\text{C}_6\text{D}_6$ ). .....                                           | 89 |
| Figure S 137: $^{13}\text{C}$ NMR spectrum of $\text{Mes}_2\text{PH}$ synthesized from $\text{Mes}_2\text{PCl}$ and $\text{PhSiH}_3$ by 9-BBN/ $[\text{NEt}_4][\text{Cl}]$ catalysis ( $\text{C}_6\text{D}_6$ ). .....                                                | 90 |
| 4.6 Synthesis of $\text{Ph}_2\text{tBu}_2\text{P}_2$ by 9-BBN/ $[\text{Et}_4\text{N}]\text{Cl}$ catalysis .....                                                                                                                                                       | 90 |
| Figure S 138: $^{31}\text{P}$ NMR spectrum of $\text{P}_2\text{Ph}_2\text{tBu}_2$ synthesized from $\text{tBuPhPCl}$ and $\text{PhSiH}_3$ by 9-BBN/ $[\text{Et}_4\text{N}]\text{Cl}$ catalysis ( $\text{C}_6\text{D}_6$ ). .....                                      | 91 |
| Figure S 139: $^1\text{H}$ NMR spectrum of $\text{P}_2\text{Ph}_2\text{tBu}_2$ synthesized from $\text{tBuPhPCl}$ and $\text{PhSiH}_3$ by 9-BBN/ $[\text{Et}_4\text{N}]\text{Cl}$ catalysis ( $\text{C}_6\text{D}_6$ ). .....                                         | 91 |
| Figure S 140: Detail of $^1\text{H}$ NMR spectrum of $\text{P}_2\text{Ph}_2\text{tBu}_2$ synthesized from $\text{tBuPhPCl}$ and $\text{PhSiH}_3$ by 9-BBN/ $[\text{Et}_4\text{N}]\text{Cl}$ catalysis ( $\text{C}_6\text{D}_6$ ). .....                               | 92 |
| Figure S 141: $^{13}\text{C}$ NMR spectrum of $\text{P}_2\text{Ph}_2\text{tBu}_2$ synthesized from $\text{tBuPhPCl}$ and $\text{PhSiH}_3$ by 9-BBN/ $[\text{Et}_4\text{N}]\text{Cl}$ catalysis ( $\text{C}_6\text{D}_6$ ). .....                                      | 92 |
| References.....                                                                                                                                                                                                                                                       | 93 |

## 1. General

Unless otherwise stated, all catalytic reactions were conducted under an inert atmosphere of dry nitrogen, using Schlenk technique or a MBraun LABmaster SP glovebox, equipped with closed loop circulation and a  $-35\text{ }^\circ\text{C}$  freezer. Toluene, *n*-pentane, and diethyl ether were collected from a Grubbs-type column system manufactured by Innovative Technology, subsequently degassed under negative pressure, and stored over  $3\text{ \AA}$  molecular sieves. Dichloromethane (DCM), *ortho*-difluorobenzene (*o*DFB) and acetonitrile ( $\text{CH}_3\text{CN}$ ) were dried over  $\text{CaH}_2$ , followed by distillation, and degassing. Molecular sieves ( $3\text{ \AA}$ , pellets,  $3.2\text{ mm}$  diameter) were purchased from Sigma Aldrich and activated prior to use by heating at  $250\text{ }^\circ\text{C}$  under dynamic vacuum for 48 hours. Deuterated solvents were distilled from  $\text{CaH}_2$  and stored over  $3\text{ \AA}$  molecular sieves. Reactions were performed using glassware that was flame or oven dried ( $180\text{ }^\circ\text{C}$ ) and subsequently cooled under negative pressure. Chlorophosphines were purchased from commercial providers and used as received, unless stated otherwise. The chlorophosphines  $(o\text{-NMe}_2\text{C}_6\text{H}_4)_2\text{PCl}^1$ ,  $(m\text{-MeC}_6\text{H}_4)_2\text{PCl}^2$ ,  $(p\text{-Cl-C}_6\text{H}_4)_2\text{PCl}^3$  and  $(2,4,6\text{-}(\text{CF}_3)_3\text{C}_6\text{H}_2)_2\text{PCl}^4, 5$  were synthesized



according to literature procedures. Cl-9-BBN was synthesized from 9-BBN and HCl according to a literature procedure<sup>6</sup> and purified by distillation.

NMR spectra were measured on a Bruker Avance III 400 MHz spectrometer. <sup>1</sup>H and <sup>13</sup>C NMR spectra were referenced to residual solvent peaks.<sup>7</sup> Chemical shifts ( $\delta$ ) are reported in ppm and the absolute values of the coupling constants ( $J$ ) are in Hz, while the multiplicity of the signals is indicated as “s”, “d”, “t”, or “m” for singlet, doublet, triplet, or multiplet, respectively. Conversions in <sup>31</sup>P NMR spectra were determined from relative integrals. No decoupling was used for <sup>31</sup>P NMR spectra that were used for conversion determination to avoid complicating NOEs. All <sup>31</sup>P NMR spectra were measured with a standard 30 degree pulse. The number of scans was at least 128 and was increased if unfavorable signal to noise ratios were obtained. D1 was set to 2 seconds. If precipitates were observed in the reaction mixture the solvent was removed and a more suitable solvent was used to ensure full solubility of all compounds. **Since T1 of different phosphorus species differ no true quantitation was possible.** For example for the system Ph<sub>2</sub>PH (T1 = 6.7 s) and Ph<sub>2</sub>PCl (T1 = 5 s) with a large difference in T1 at a d1 of 2 seconds the amount of Ph<sub>2</sub>PCl in the reaction mixture will be overestimated (A 1:1 mixture of Ph<sub>2</sub>PCl:Ph<sub>2</sub>PH would show a ratio of ~1.28: 1).<sup>8</sup> An increase of D1 would have resulted in long measurement times and was not deemed practicable given the number of experiments run in this study. Nevertheless relative integrals in <sup>31</sup>P NMR spectra are good approximations for the actual amount of phosphorus species in solution and within one R<sub>2</sub>PCl/R<sub>2</sub>PH/P<sub>2</sub>R<sub>4</sub> system comparison of different catalytic systems seems reasonable.

## 2. Catalysis

### 2.1 9-BBN catalyzed reactions

#### 2.1.1 Initial screening reactions

**General procedure:** Ph<sub>2</sub>PCl (19.9 mg, 0.09 mmol, 1 equiv), silane (1 equiv) and 9-BBN (0.05 equiv or 0.1 equiv) were dissolved in solvent (0.6 ml) and kept at the indicated temperature in a J-Young tube. The reaction progress was monitored by <sup>31</sup>P NMR spectroscopy. Reactions under static vacuum were frozen directly after mixing of the reagents and the headspace of the J-Young tube was evacuated, after which the mixture was kept at the indicated temperature.

**Table S 1: Conversion of Ph<sub>2</sub>PCl to Ph<sub>2</sub>PH and P<sub>2</sub>Ph<sub>4</sub> with 9-BBN and silanes.**

| Silane                                  | Solvent      | Temperature [°C] | Time [h] | Conv. [%] | Ph <sub>2</sub> PH (%), P <sub>2</sub> Ph <sub>4</sub> (%) |
|-----------------------------------------|--------------|------------------|----------|-----------|------------------------------------------------------------|
| Et <sub>3</sub> SiH                     | 1,2-DCE      | 60               | 18       | 35        | PH (43%), PP (57%)                                         |
| Et <sub>3</sub> SiH                     | <i>o</i> DFB | 60               | 72       | 55        | PH (35%), PP (65%)                                         |
| Et <sub>3</sub> SiH <sup>[a]</sup>      | <i>o</i> DFB | 60               | 7        | <1        | PH (-), PP (99%)                                           |
| Et <sub>3</sub> SiH                     | <i>o</i> DFB | rt               | 7        | 2         | PH (-), PP (99%)                                           |
| Et <sub>3</sub> SiH                     | <i>o</i> DCB | 100              | 18       | 93        | PH (62%), PP (38%)                                         |
| Et <sub>3</sub> SiH                     | <i>o</i> DCB | 80               | 96       | 95        | PH (47%), PP (53%)                                         |
| PhSiH <sub>3</sub>                      | 1,2-DCE      | 70               | 30       | >99       | PH (84%), PP (16%)                                         |
| Et <sub>3</sub> SiH <sup>[b]</sup>      | 1,2-DCE      | 70               | 54       | 83        | PH (55%), PP (45%)                                         |
| Et <sub>3</sub> SiH <sup>[b]</sup>      | 1,2-DCE      | 60               | 8        | 20        | PH (-), PP (>99%)                                          |
| PhSiH <sub>3</sub>                      | 1,2-DCE      | 60               | 30       | >99       | PH (75%), PP (25%)                                         |
| Ph <sub>2</sub> ClSiH                   | 1,2-DCE      | 60               | 48       | 23        | PH (72%), PP (28%)                                         |
| PhSiH <sub>3</sub>                      | 1,2-DCE      | 30               | 24       | >99       | PH (49%), PP (51%)                                         |
| Et <sub>3</sub> SiH <sup>[b], [c]</sup> | 1,2-DCE      | 60               | 30       | 66        | PH (40%), PP (60%)                                         |
| PhSiH <sub>3</sub> <sup>[d]</sup>       | 1,2-DCE      | 30               | 10       | 58        | PH (41%), PP (59%)                                         |
| PhSiH <sub>3</sub> <sup>[e]</sup>       | 1,2-DCE      | 30               | 10       | 58        | PH (33%), PP (67%)                                         |

|                                    |                                  |    |    |     |                    |
|------------------------------------|----------------------------------|----|----|-----|--------------------|
| PhSiH <sub>3</sub> <sup>[f]</sup>  | 1,2-DCE                          | 30 | 10 | 63  | PH (38%), PP (62%) |
| PhSiH <sub>3</sub>                 | MeCN                             | 30 | 20 | >99 | PH (-), PP (>99%)  |
| PhSiH <sub>3</sub>                 | <i>o</i> DFB                     | 30 | 10 | >99 | PH (36%), PP (64%) |
| PhSiH <sub>3</sub> <sup>[a]</sup>  | MeCN                             | 30 | 24 | 46  | PH (-), PP (>99%)  |
| PhSiH <sub>3</sub>                 | MeCN                             | 50 | 8  | >99 | PH (21%), PP (79%) |
| Et <sub>3</sub> SiH <sup>[b]</sup> | MeCN                             | 60 | 32 | 92  | PH (-), PP (>99%)  |
| PhSiH <sub>3</sub> <sup>[a]</sup>  | 1,2-DCE                          | 30 | 32 | 1   | PH (-), PP (>99%)  |
| PhSiH <sub>3</sub>                 | <i>o</i> DFB/MeCN <sup>[g]</sup> | 30 | 20 | 99  | PH (-), PP (>99%)  |

Reaction conditions unless stated otherwise: 0.5 mol% 9-BBN, 1 equiv silane, 0.15 M in solvent. [a] No 9-BBN used. [b] 10 mol% 9-BBN used. [c] Reaction was kept under static vacuum. [d] 1.2 equiv PhSiH<sub>3</sub> were used. [e] 1.4 equiv PhSiH<sub>3</sub> were used. [f] 1.6 equiv PhSiH<sub>3</sub> were used. [g] *o*DFB/MeCN, 2/1, V/V.

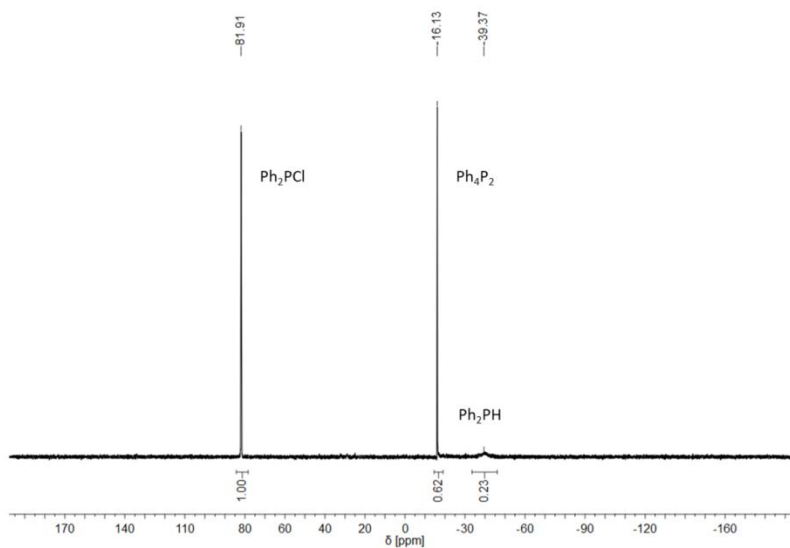

Figure S 1: <sup>31</sup>P NMR spectrum of 9-BBN catalyzed reaction of Ph<sub>2</sub>PCl with Et<sub>3</sub>SiH (60°C, 1,2-DCE, after 18 hours).

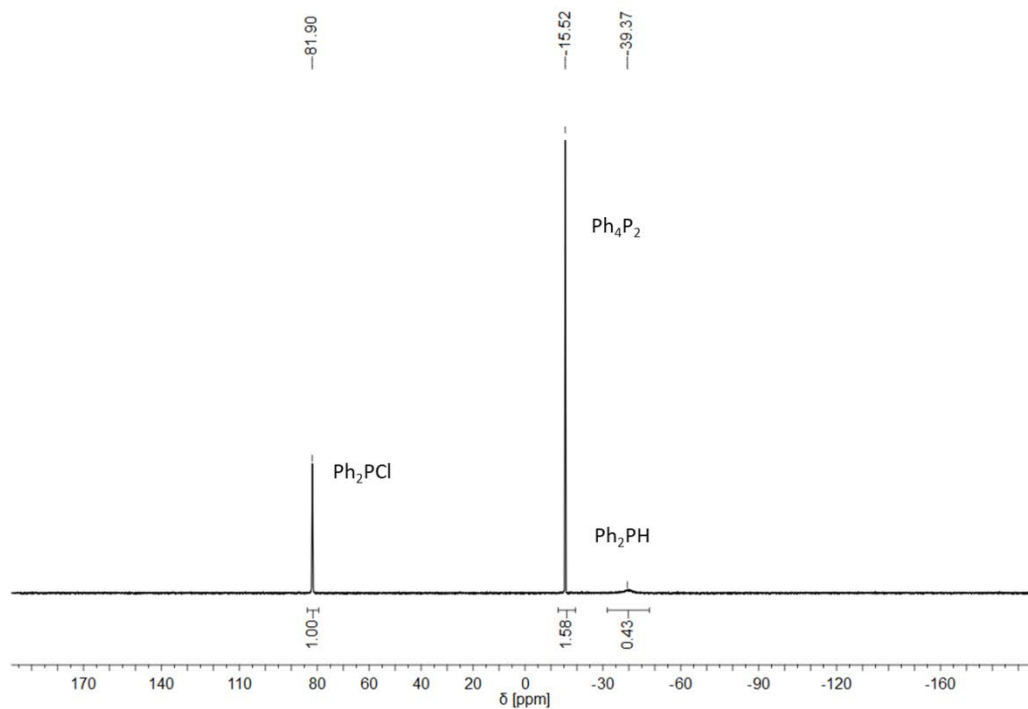

Figure S 2: <sup>31</sup>P NMR spectrum of 9-BBN catalyzed reaction of Ph<sub>2</sub>PCl with Et<sub>3</sub>SiH (60°C, *o*DFB, after 72 hours).

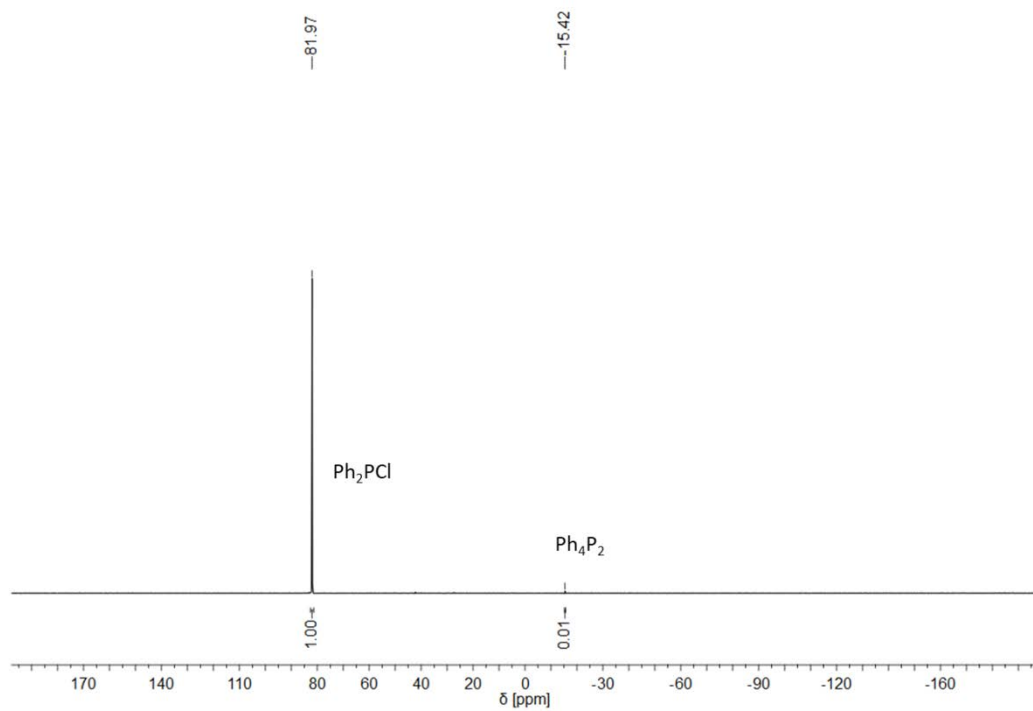

Figure S 3:  $^{31}\text{P}$  NMR spectrum of reaction of  $\text{Ph}_2\text{PCl}$  with  $\text{Et}_3\text{SiH}$  ( $60^\circ\text{C}$ ,  $o\text{DFB}$ , after 7 hours). No 9-BBN was added.

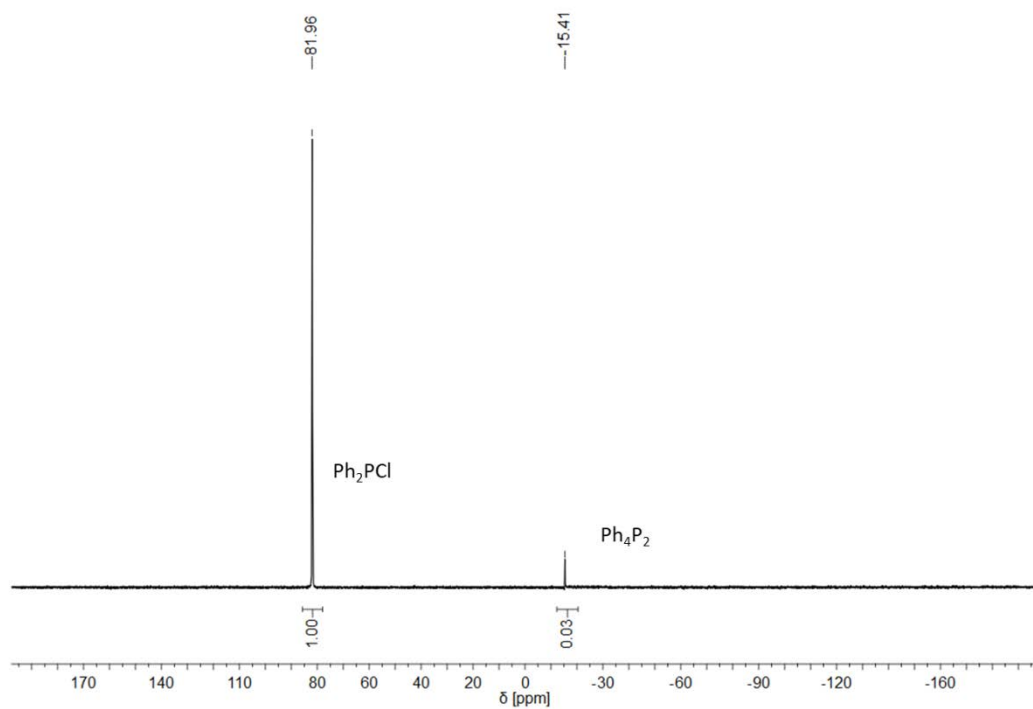

Figure S 4:  $^{31}\text{P}$  NMR spectrum of 9-BBN catalyzed reaction of  $\text{Ph}_2\text{PCl}$  with  $\text{Et}_3\text{SiH}$  ( $rt$ ,  $o\text{DFB}$ , after 7 hours).

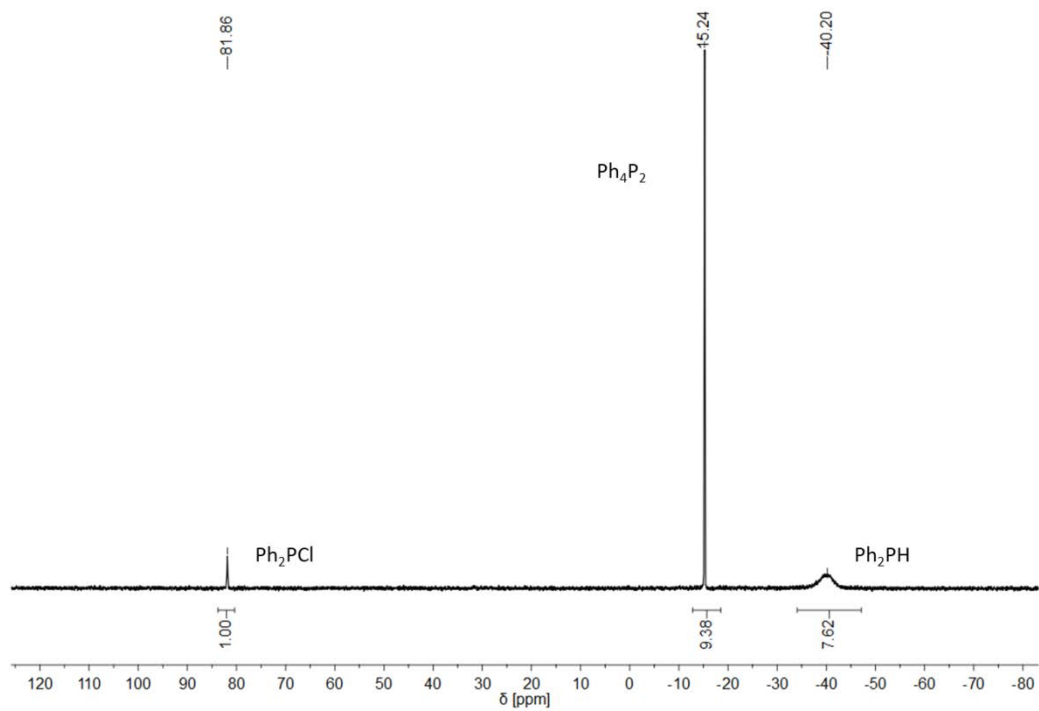

Figure S 5:  $^{31}\text{P}$  NMR spectrum of 9-BBN catalyzed reaction of  $\text{Ph}_2\text{PCl}$  with  $\text{Et}_3\text{SiH}$  ( $100^\circ\text{C}$ , *o*DCB, after 18 hours).

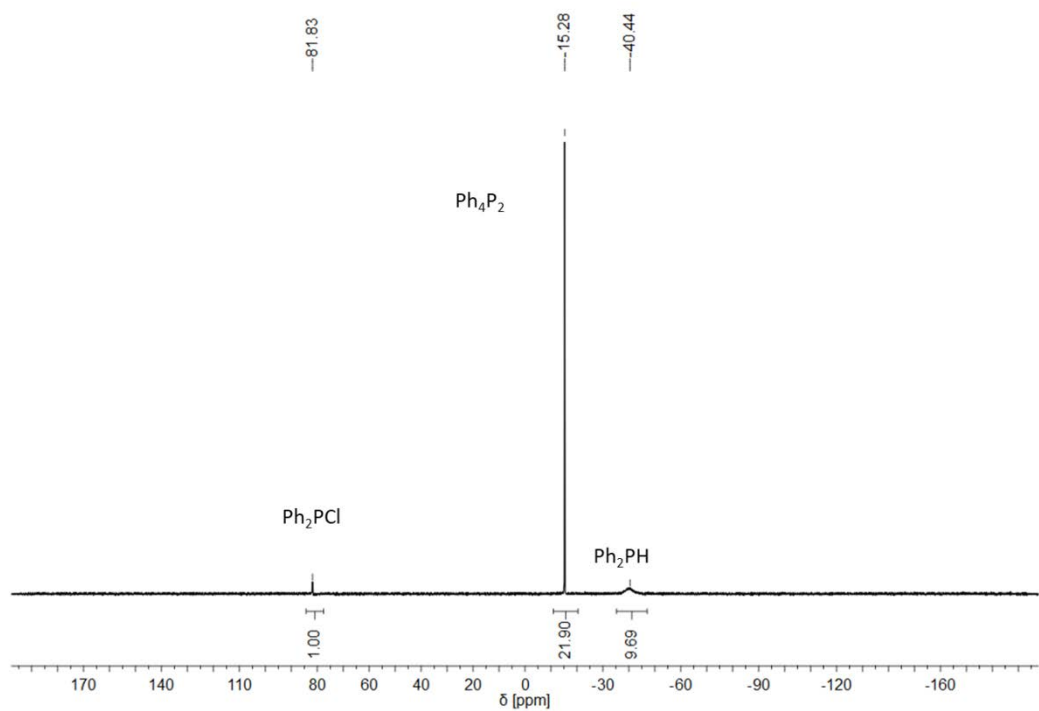

Figure S 6:  $^{31}\text{P}$  NMR spectrum of 9-BBN catalyzed reaction of  $\text{Ph}_2\text{PCl}$  with  $\text{Et}_3\text{SiH}$  ( $80^\circ\text{C}$ , *o*DCB, after 96 hours).

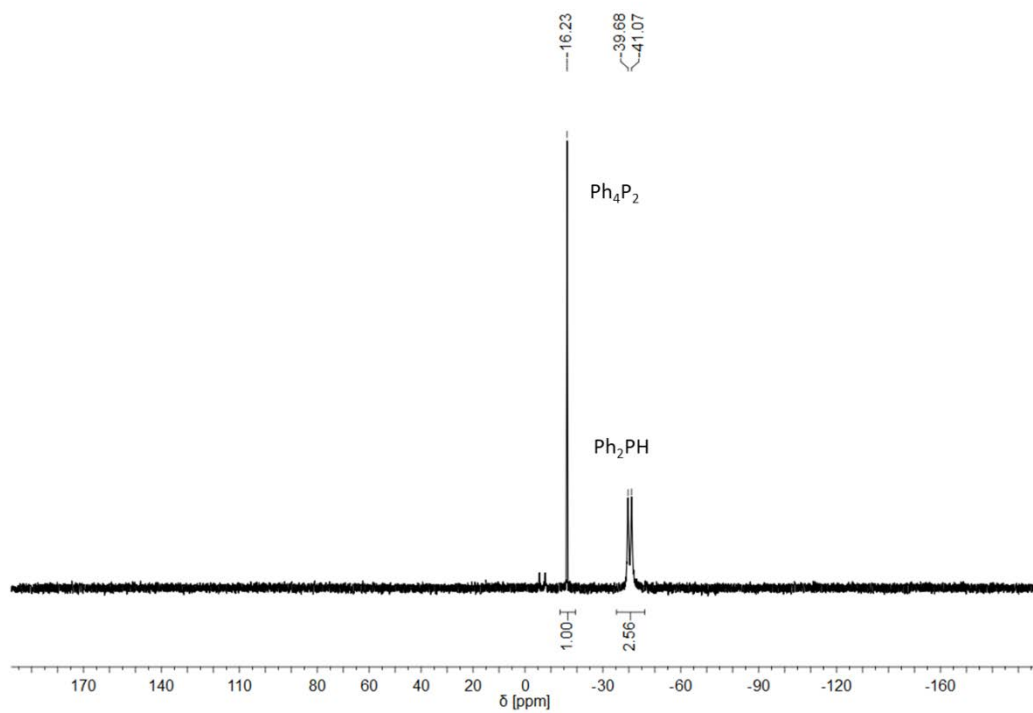

Figure S 7:  $^{31}\text{P}$  NMR spectrum of 9-BBN catalyzed reaction of  $\text{Ph}_2\text{PCL}$  with  $\text{PhSiH}_3$  ( $70^\circ\text{C}$ , 1,2-DCE, after 30 hours).

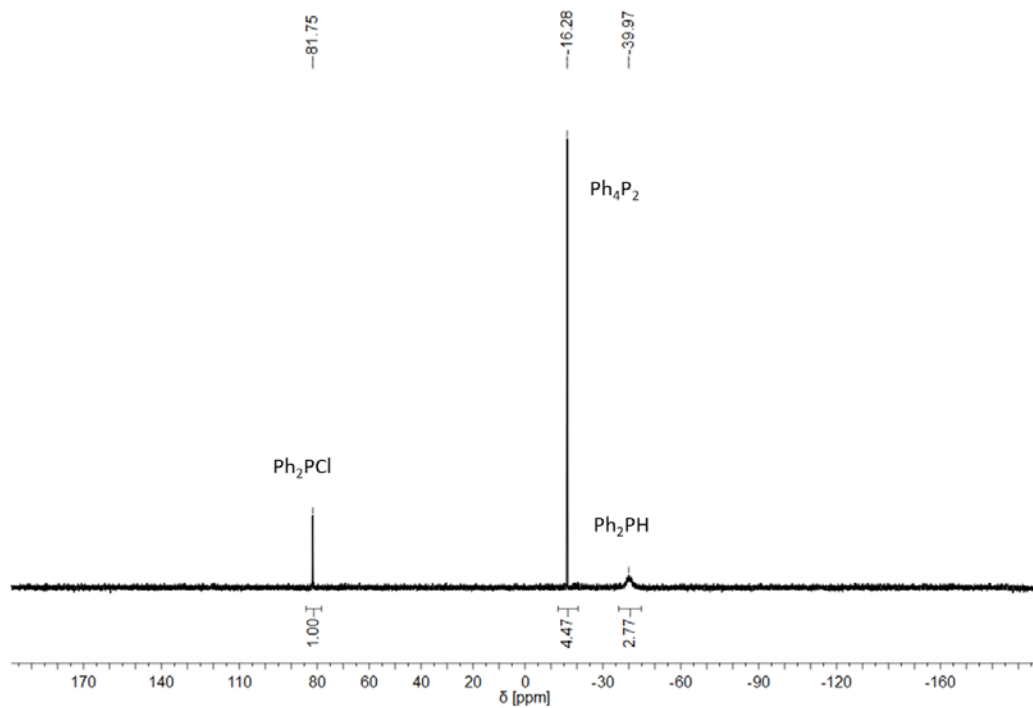

Figure S 8:  $^{31}\text{P}$  NMR spectrum of 9-BBN catalyzed reaction of  $\text{Ph}_2\text{PCL}$  with  $\text{Et}_3\text{SiH}$  ( $70^\circ\text{C}$ , 1,2-DCE, after 54 hours). 10 mol% 9-BBN used.

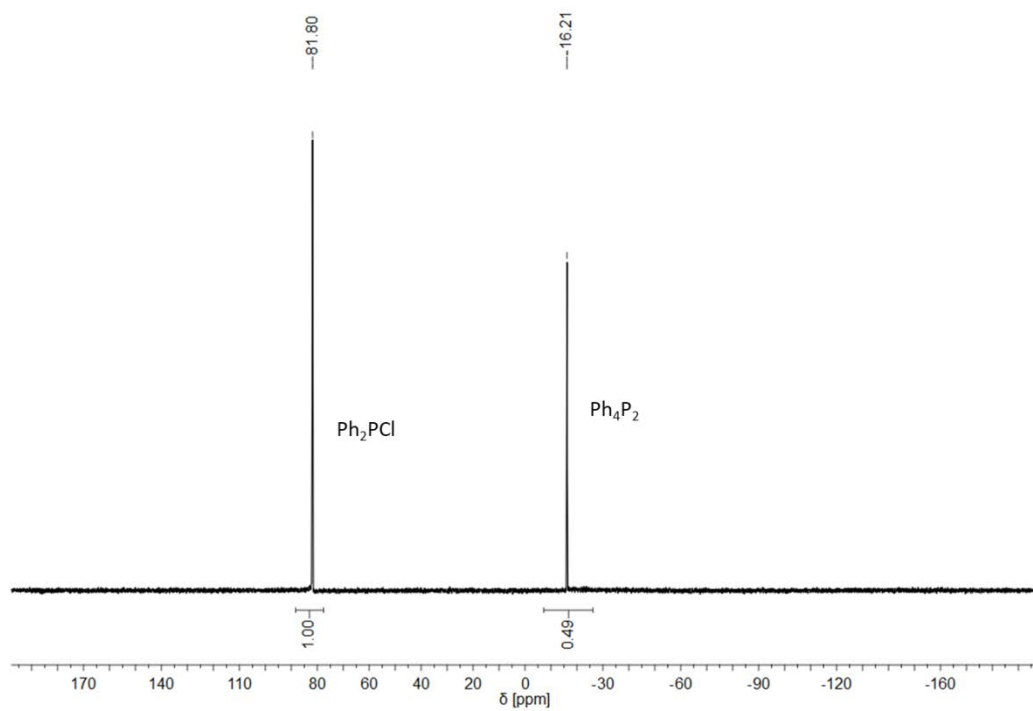

Figure S 9:  $^{31}\text{P}$  NMR spectrum of 9-BBN catalyzed reaction of  $\text{Ph}_2\text{PCl}$  with  $\text{Et}_3\text{SiH}$  ( $60^\circ\text{C}$ , 1,2-DCE, after 8 hours). 10 mol% 9-BBN used.

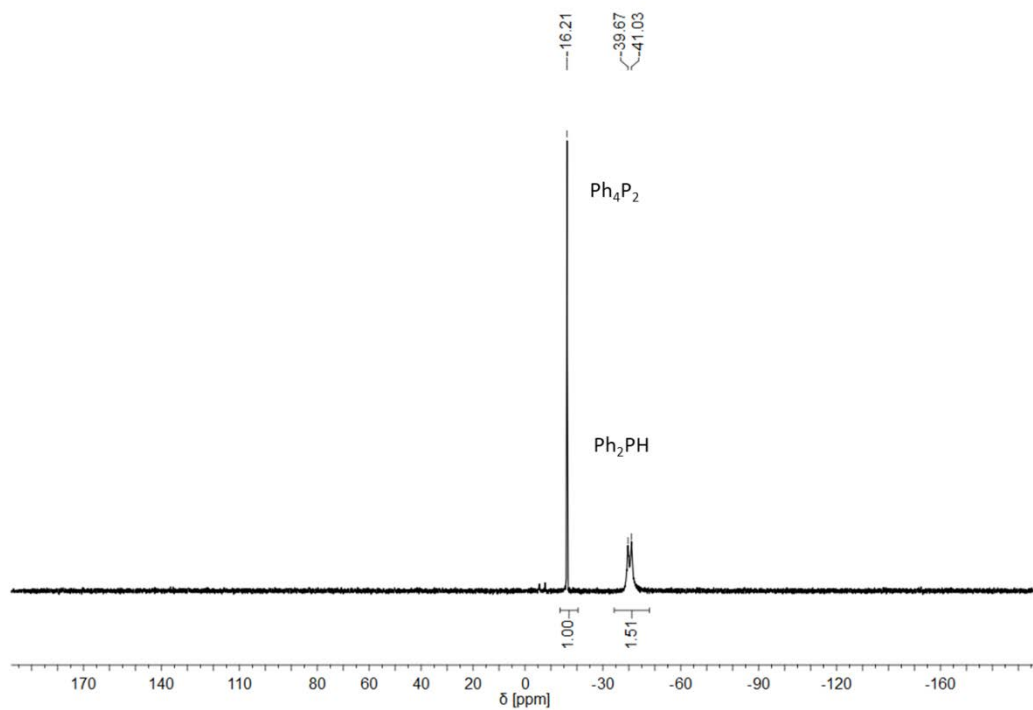

Figure S 10:  $^{31}\text{P}$  NMR spectrum of 9-BBN catalyzed reaction of  $\text{Ph}_2\text{PCl}$  with  $\text{PhSiH}_3$  ( $60^\circ\text{C}$ , 1,2-DCE, after 30 hours).

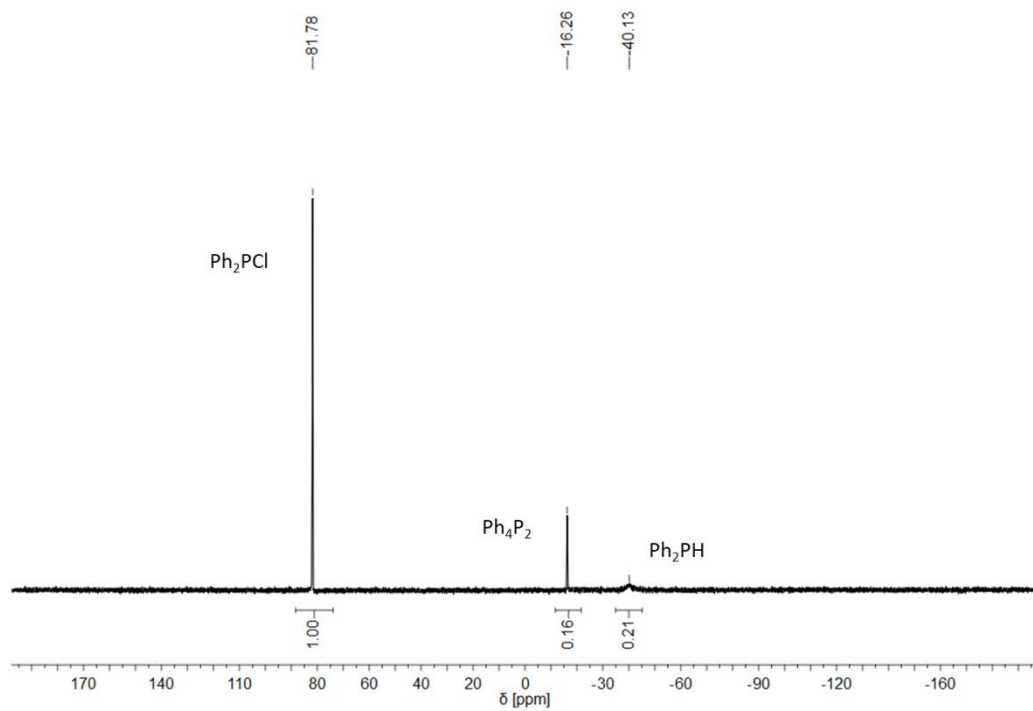

Figure S 11:  $^{31}\text{P}$  NMR spectrum of 9-BBN catalyzed reaction of  $\text{Ph}_2\text{PCl}$  with  $\text{Ph}_2\text{ClSiH}$  ( $60^\circ\text{C}$ , 1,2-DCE, after 48 hours).

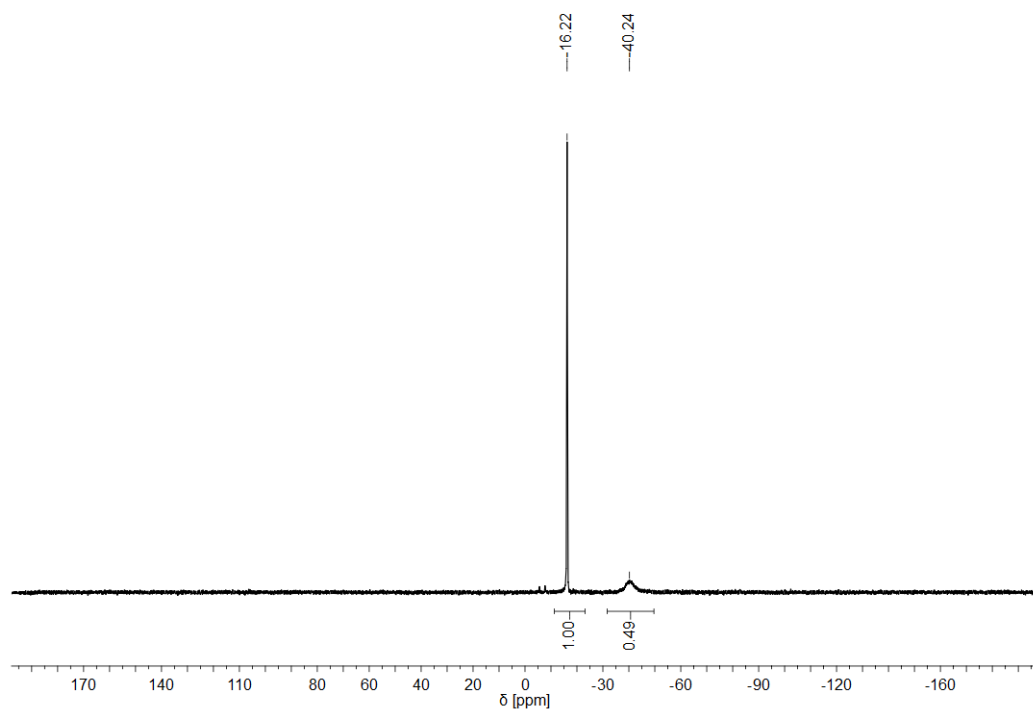

Figure S 12:  $^{31}\text{P}$  NMR spectrum of 9-BBN catalyzed reaction of  $\text{Ph}_2\text{PCl}$  with  $\text{PhSiH}_3$  ( $30^\circ\text{C}$ , 1,2-DCE, after 24 hours).

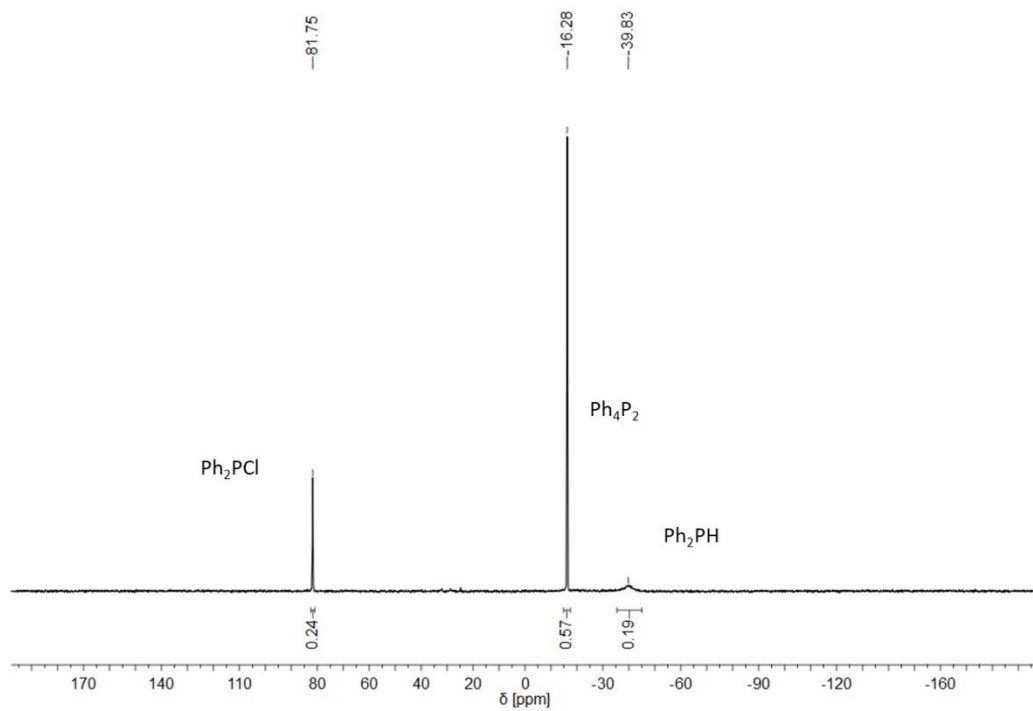

Figure S 13:  $^{31}\text{P}$  NMR spectrum of 9-BBN catalyzed reaction of  $\text{Ph}_2\text{PCl}$  with  $\text{Et}_3\text{SiH}$  ( $60^\circ\text{C}$ , 1,2-DCE, after 30 hours). Reaction was kept under static vacuum (freeze pump thaw).

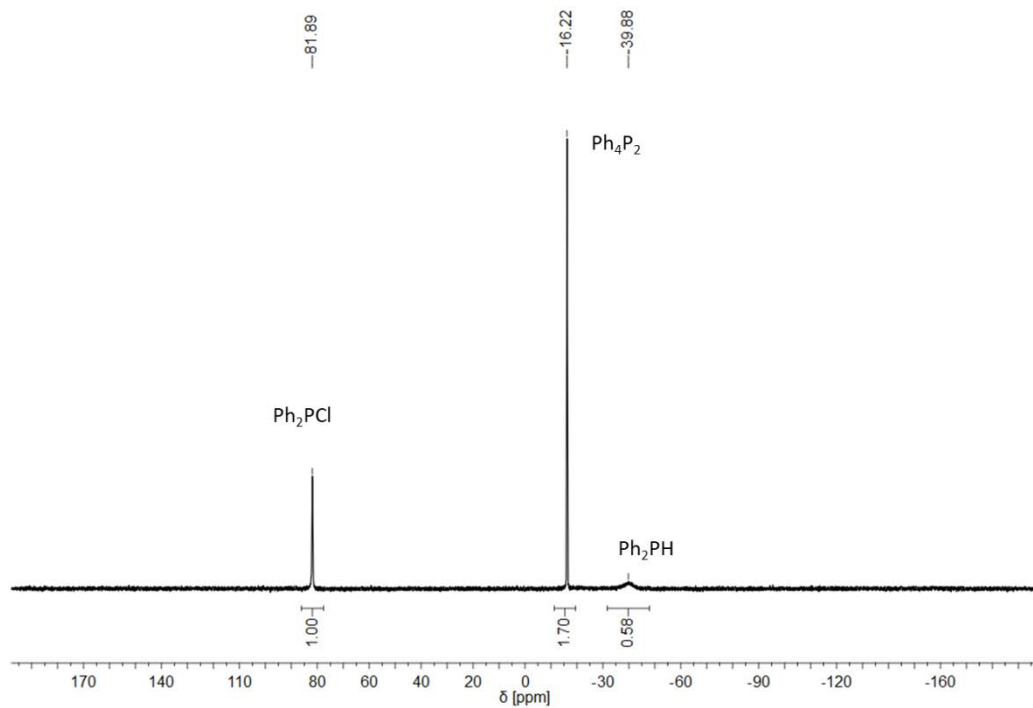

Figure S 14:  $^{31}\text{P}$  NMR spectrum of 9-BBN catalyzed reaction of  $\text{Ph}_2\text{PCl}$  with  $\text{PhSiH}_3$  ( $30^\circ\text{C}$ , 1,2-DCE, after 10 hours). 1.2 equiv of  $\text{PhSiH}_3$  were used.



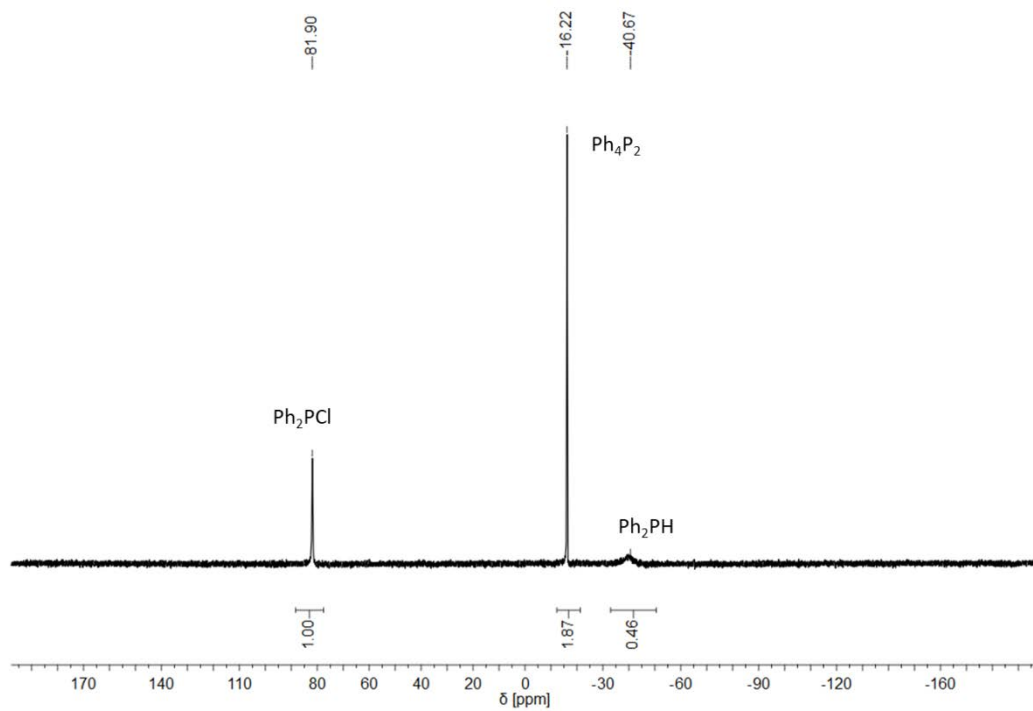

Figure S 15:  $^{31}\text{P}$  NMR spectrum of 9-BBN catalyzed reaction of  $\text{Ph}_2\text{PCL}$  with  $\text{PhSiH}_3$  (30°C, 1,2-DCE, after 10 hours). 1.4 equiv of  $\text{PhSiH}_3$  were used.

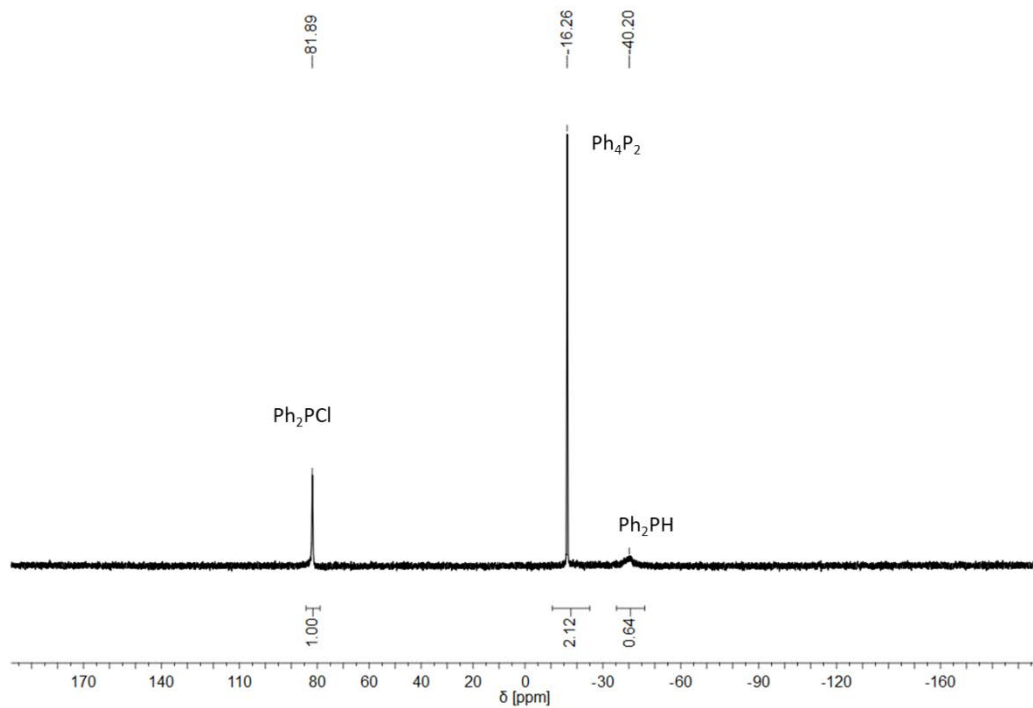

Figure S 16:  $^{31}\text{P}$  NMR spectrum of 9-BBN catalyzed reaction of  $\text{Ph}_2\text{PCL}$  with  $\text{PhSiH}_3$  (30°C, 1,2-DCE, after 10 hours). 1.6 equiv of  $\text{PhSiH}_3$  were used.

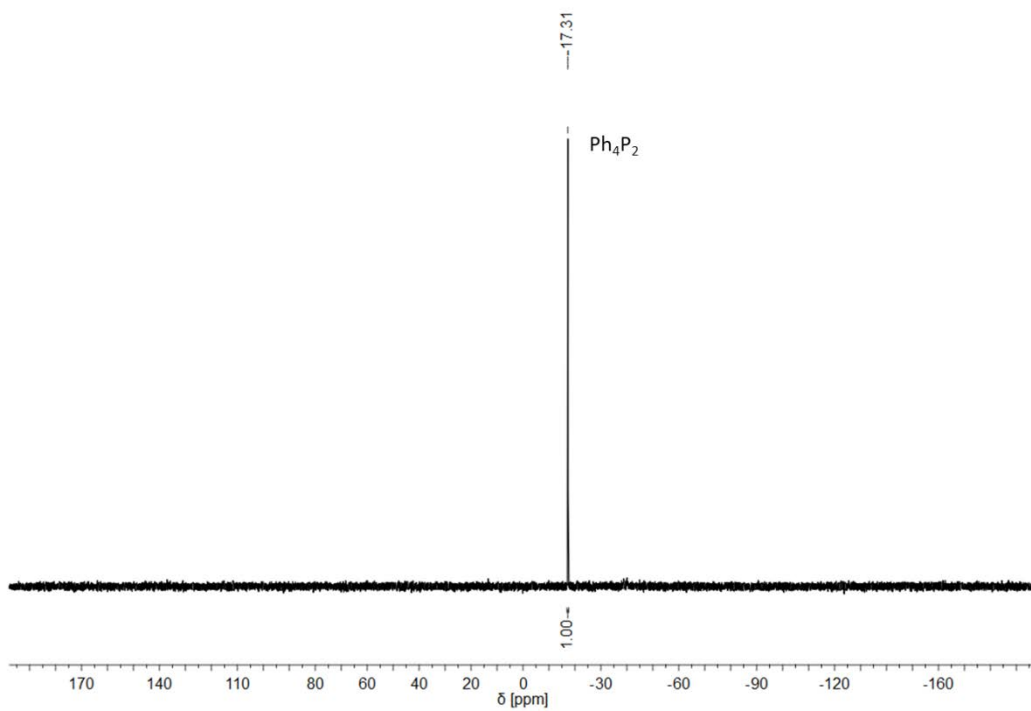

Figure S 17:  $^{31}\text{P}$  NMR spectrum of 9-BBN catalyzed reaction of  $\text{Ph}_2\text{PCl}$  with  $\text{PhSiH}_3$  ( $30^\circ\text{C}$ , MeCN, after 20 hours).

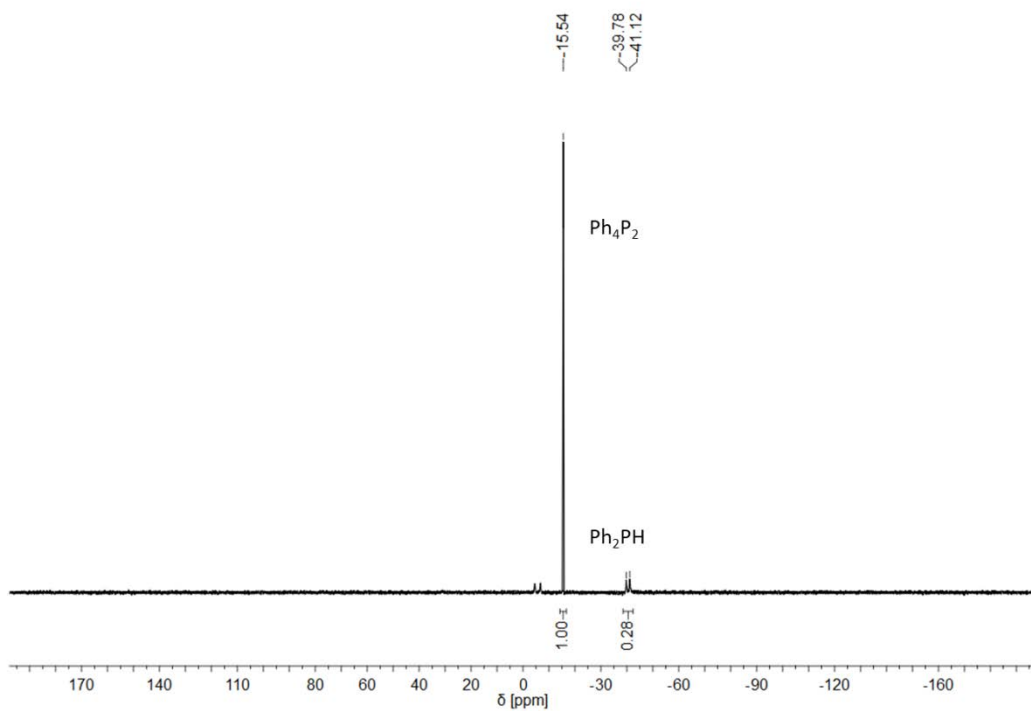

Figure S 18:  $^{31}\text{P}$  NMR spectrum of 9-BBN catalyzed reaction of  $\text{Ph}_2\text{PCl}$  with  $\text{PhSiH}_3$  ( $30^\circ\text{C}$ , oDFB, after 10 hours).

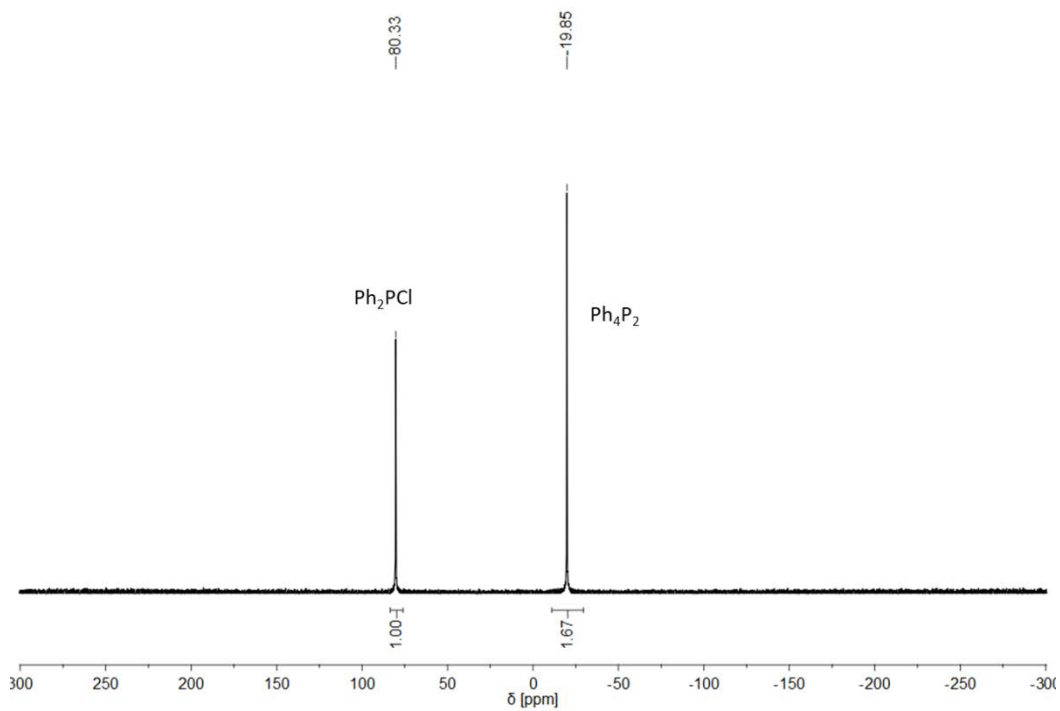

Figure S 19:  $^{31}\text{P}$  NMR spectrum of reaction of  $\text{Ph}_2\text{PCL}$  with  $\text{PhSiH}_3$  (30°C, MeCN, after 24 hours). No 9-BBN used.

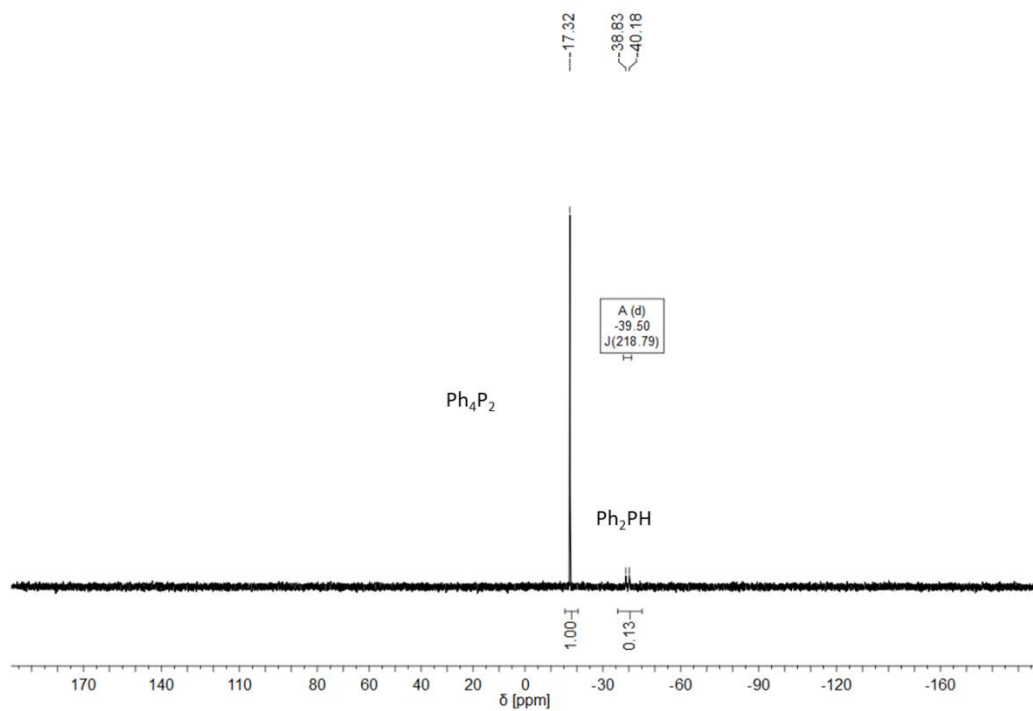

Figure S 20:  $^{31}\text{P}$  NMR spectrum of 9-BBN catalyzed reaction of  $\text{Ph}_2\text{PCL}$  with  $\text{PhSiH}_3$  (50°C, MeCN, after 8 hours).

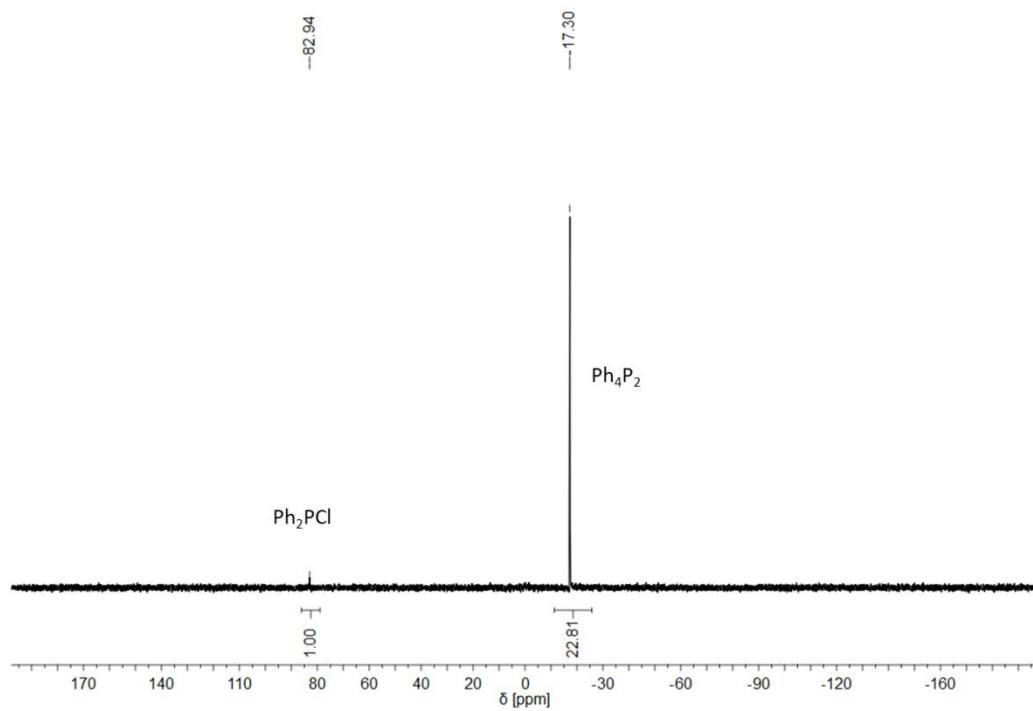

Figure S 21:  $^{31}\text{P}$  NMR spectrum of 9-BBN catalyzed reaction of  $\text{Ph}_2\text{PCl}$  with  $\text{Et}_3\text{SiH}$  ( $60^\circ\text{C}$ , MeCN, after 32 hours).

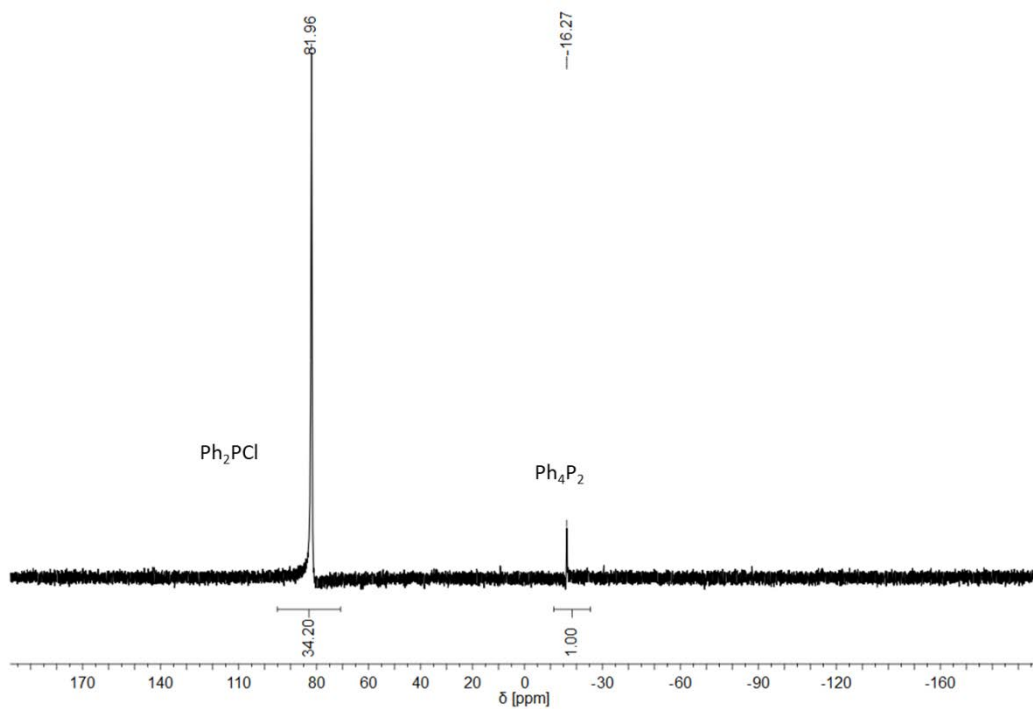

Figure S 22:  $^{31}\text{P}$  NMR spectrum of reaction of  $\text{Ph}_2\text{PCl}$  with  $\text{PhSiH}_3$  ( $60^\circ\text{C}$ , 1,2-DCE, after 32 hours). No 9-BBN used.

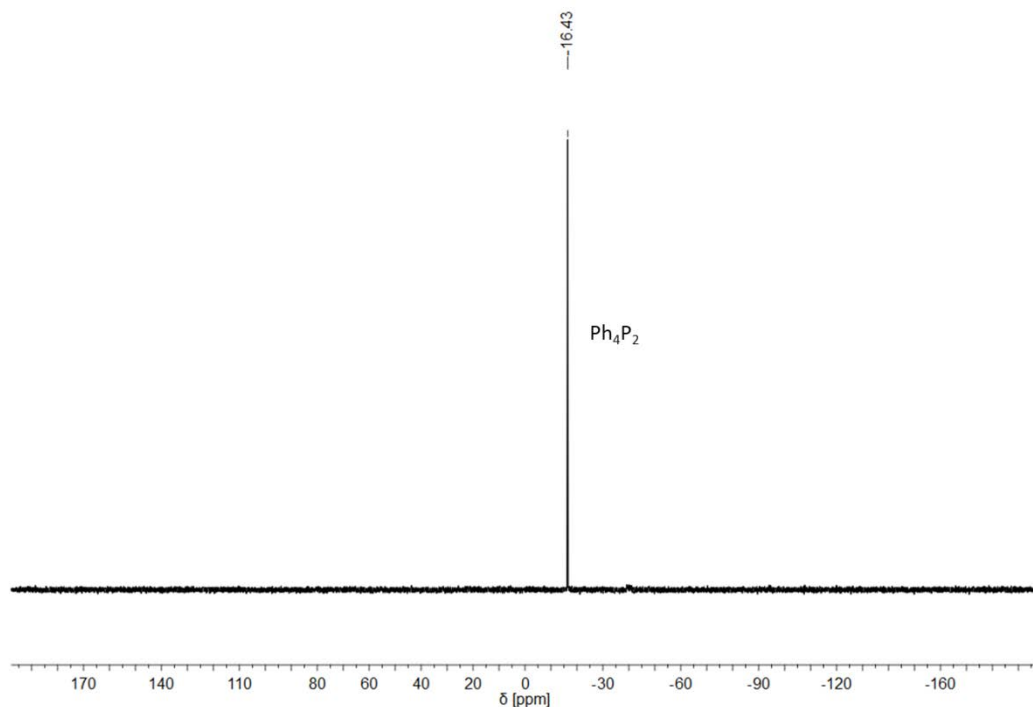

Figure S 23:  $^{31}\text{P}$  NMR spectrum of 9-BBN catalyzed reaction of  $\text{Ph}_2\text{P}(\text{Cl})$  with  $\text{PhSiH}_3$  (30°C, MeCN/oDFB, after 20 hours).

### 2.1.2 Catalysis with 9-BBN and phenylsilane: Phosphine scope

**General procedure:**  $\text{R}_2\text{P}(\text{Cl})$  (0.09 mmol, 1 equiv), silane (1 equiv) and 9-BBN (0.05 equiv or 0.1 equiv) were dissolved in solvent (0.6 ml) and kept at the indicated temperature in a J-Young tube. The reaction progress was monitored by  $^{31}\text{P}$  NMR spectroscopy.

Table S 2: Synthesis of  $\text{R}_2\text{PH}$  and  $\text{R}_2\text{PPR}_2$  from  $\text{R}_2\text{P}(\text{Cl})$  with 9-BBN and  $\text{PhSiH}_3$ .

| Phosphine                                      | Temp. [°C] | Time [h] | solvent   | Conv [%] | Product                                                 | $\delta(^{31}\text{P})$ [ppm]                          | Literature $\delta(^{31}\text{P})$ [ppm]                                                    |
|------------------------------------------------|------------|----------|-----------|----------|---------------------------------------------------------|--------------------------------------------------------|---------------------------------------------------------------------------------------------|
| $\text{Ph}_2\text{P}(\text{Cl})$               | 30         | 20       | MeCN/oDFB | >99      | $\text{Ph}_2\text{PPH}_2$                               | -16.4 (s)                                              | -16.7 ( $\text{CH}_2\text{Cl}_2$ ) <sup>8</sup>                                             |
| $i\text{Pr}_2\text{P}(\text{Cl})$              | 30         | 20       | MeCN      | 45       | $i\text{Pr}_2\text{PH}$                                 | -16.2 (d, $^1J_{\text{PH}} = 199$ Hz)                  | -16.49 ( $^{31}\text{P}^9$ , $\text{C}_6\text{D}_6$ ) <sup>10</sup>                         |
| $i\text{Pr}_2\text{P}(\text{Cl})$              | 30         | 42       | MeCN/oDFB | 92       | $i\text{Pr}_2\text{PH}$                                 |                                                        |                                                                                             |
| $i\text{Pr}_2\text{P}(\text{Cl})$              | 60         | 8        | MeCN/oDFB | >99      | $i\text{Pr}_2\text{PH}$                                 |                                                        |                                                                                             |
| $i\text{Pr}_2\text{P}(\text{Cl})^{\text{[a]}}$ | 60         | 12       | MeCN/oDFB | -        |                                                         |                                                        |                                                                                             |
| $\text{Cy}_2\text{P}(\text{Cl})$               | 30         | 38       |           |          |                                                         | -27.9 (d, $^1J_{\text{PH}} = 195$ Hz)                  | -28.1 (d, $^1J_{\text{PH}} = 198$ Hz, $\text{CD}_3\text{CN}$ ) <sup>11</sup>                |
| $\text{Cy}_2\text{P}(\text{Cl})$               | 60         | 8        | MeCN/oDFB | >99      | $\text{Cy}_2\text{PH}$                                  |                                                        |                                                                                             |
| $t\text{Bu}_2\text{P}(\text{Cl})$              | 30         | 8 d      | MeCN/oDFB | 75       | $t\text{Bu}_2\text{PH}$                                 | 19.7 (d, $^1J_{\text{PH}} = 201$ Hz)                   | 19.5 (d, $^1J_{\text{PH}} = 203$ Hz) <sup>8</sup>                                           |
| $t\text{Bu}_2\text{P}(\text{Cl})$              | 60         | 48       | MeCN/oDFB | 65       | $t\text{Bu}_2\text{PH}$                                 |                                                        |                                                                                             |
| $t\text{Bu}_2\text{P}(\text{Cl})$              | 80         | 5 d      | MeCN/oDFB | 96       | $t\text{Bu}_2\text{PH}$                                 |                                                        |                                                                                             |
| $t\text{BuPhP}(\text{Cl})$                     | 30         | 42       | MeCN/oDFB | 85       | $t\text{BuPhPH}$ (77%)<br>; $t\text{BuPhPPtBuPh}$ (23%) | -6.1 (d, $^1J_{\text{PH}} = 212$ Hz);<br>(s), -4.6 (s) | -5.7 (d, $^1J_{\text{PH}} = 210$ Hz) <sup>8</sup> ;<br>1.9 <sup>8</sup> , -4.7 <sup>8</sup> |
| $t\text{BuPhP}(\text{Cl})$                     | 60         | 48       | MeCN/oDFB | 49       | $t\text{BuPhPH}$ (56%)<br>; $t\text{BuPhPPtBuPh}$ (44%) |                                                        |                                                                                             |
| $t\text{BuPhP}(\text{Cl})$                     | 80         | 24       | MeCN/oDFB | >99      | $t\text{BuPhPH}$ (92%)                                  |                                                        |                                                                                             |

|                                                                                        |    |    |                    |     |                                                                                                                                                                                                                                                                                                                                                         |
|----------------------------------------------------------------------------------------|----|----|--------------------|-----|---------------------------------------------------------------------------------------------------------------------------------------------------------------------------------------------------------------------------------------------------------------------------------------------------------------------------------------------------------|
|                                                                                        |    |    |                    |     | ; <i>t</i> BuPhPP <i>t</i> BuPh<br>(8%)                                                                                                                                                                                                                                                                                                                 |
| ( <i>o</i> -OMeC <sub>6</sub> H <sub>4</sub> ) <sub>2</sub> PCl                        | 30 | 10 | MeCN/ <i>o</i> DFB | 95  | ( <i>o</i> -OMePh) <sub>2</sub> PP( <i>o</i> -OMePh) <sub>2</sub> (88%); ( <i>o</i> -OMePh) <sub>2</sub> PH (12%)                                                                                                                                                                                                                                       |
| ( <i>o</i> -tol) <sub>2</sub> PCl                                                      | 30 | 7  | MeCN/ <i>o</i> DFB | >99 | ( <i>o</i> -tol) <sub>2</sub> PP( <i>o</i> -tol) <sub>2</sub> PH (-) (97%)                                                                                                                                                                                                                                                                              |
| Mes <sub>2</sub> PCl                                                                   | 30 | 24 | MeCN/ <i>o</i> DFB | >99 | Mes <sub>2</sub> PPMes <sub>2</sub> (3%); Mes <sub>2</sub> PH (97%)                                                                                                                                                                                                                                                                                     |
| ( <i>p</i> -FC <sub>6</sub> H <sub>4</sub> ) <sub>2</sub> PCl                          | 30 | 20 | MeCN/ <i>o</i> DFB | >99 | ( <i>p</i> -FC <sub>6</sub> H <sub>4</sub> ) <sub>2</sub> PP( <i>p</i> -FC <sub>6</sub> H <sub>4</sub> ) <sub>2</sub> PH (30%)                                                                                                                                                                                                                          |
| ( <i>p</i> -CF <sub>3</sub> C <sub>6</sub> H <sub>4</sub> ) <sub>2</sub> PCl           | 30 | 20 | MeCN/ <i>o</i> DFB | >99 | ( <i>p</i> -CF <sub>3</sub> C <sub>6</sub> H <sub>4</sub> ) <sub>2</sub> PP( <i>p</i> -CF <sub>3</sub> C <sub>6</sub> H <sub>4</sub> ) <sub>2</sub> PH (52%)                                                                                                                                                                                            |
| (3,5-(CF <sub>3</sub> ) <sub>2</sub> -C <sub>6</sub> H <sub>3</sub> ) <sub>2</sub> PCl | 30 | 6  | MeCN/ <i>o</i> DFB |     | (3,5-(CF <sub>3</sub> ) <sub>2</sub> -C <sub>6</sub> H <sub>3</sub> ) <sub>2</sub> PP(3,5-(CF <sub>3</sub> ) <sub>2</sub> -C <sub>6</sub> H <sub>3</sub> ) <sub>2</sub> PH (81%)                                                                                                                                                                        |
| PhPCl <sub>2</sub>                                                                     | 30 | 48 | MeCN/ <i>o</i> DFB | >99 | PP (>99%)<br>Ph <sub>5</sub> P <sub>5</sub> (93%)<br>Ph <sub>4</sub> P <sub>4</sub> (5%)<br>Ph <sub>6</sub> P <sub>6</sub> (2%)                                                                                                                                                                                                                         |
|                                                                                        |    |    |                    |     | Ph <sub>5</sub> P <sub>5</sub> -4 (m) Ph <sub>5</sub> P <sub>5</sub> -3 (m); <sup>18</sup><br>Ph <sub>4</sub> P <sub>4</sub> -48.8; Ph <sub>4</sub> P <sub>4</sub> -48<br>Ph <sub>6</sub> P <sub>6</sub> -22.4 (CH <sub>2</sub> Cl <sub>2</sub> ) <sup>18</sup> ; Ph <sub>6</sub> P <sub>6</sub><br>-21.2 (C <sub>6</sub> D <sub>6</sub> ) <sup>9</sup> |

Reaction conditions: 5 mol% 9-BBN, 0.15 M (R<sub>2</sub>PCl), 1 equiv PhSiH<sub>3</sub>, *o*DFB/MeCN, 2/1, V/V. [a] No 9-BBN used.

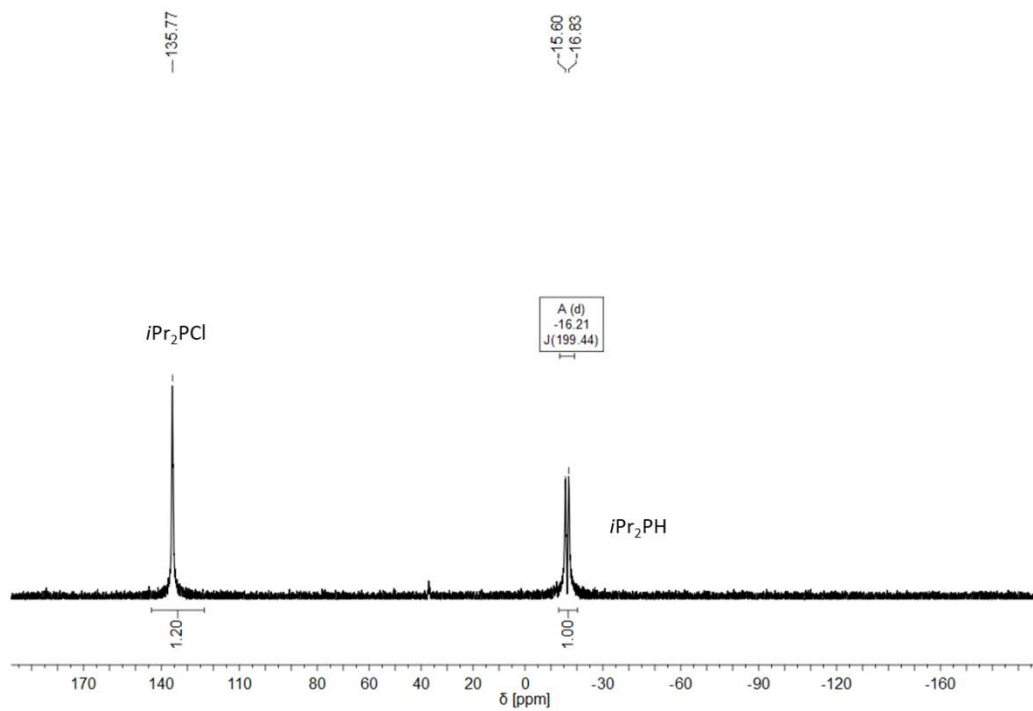

Figure S 24:  $^{31}\text{P}$  NMR spectrum of 9-BBN catalyzed reaction of  $i\text{Pr}_2\text{PCL}$  with  $\text{PhSiH}_3$  (30°C, MeCN, after 20 hours).

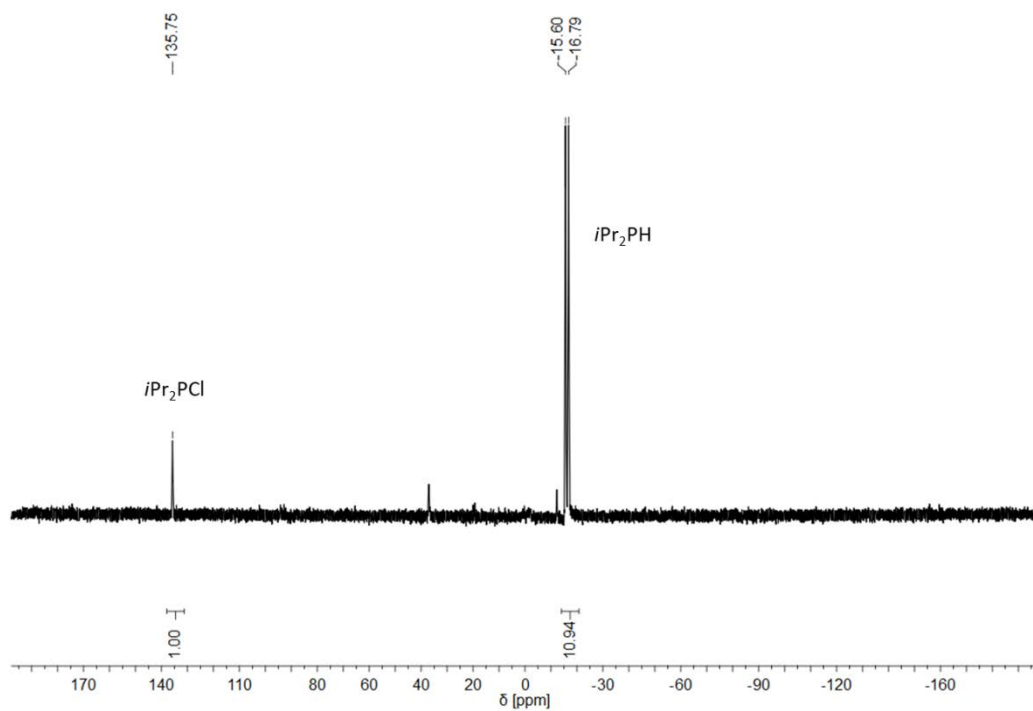

Figure S 25:  $^{31}\text{P}$  NMR spectrum of 9-BBN catalyzed reaction of  $i\text{Pr}_2\text{PCL}$  with  $\text{PhSiH}_3$  (30°C, oDFB/MeCN, after 42 hours).

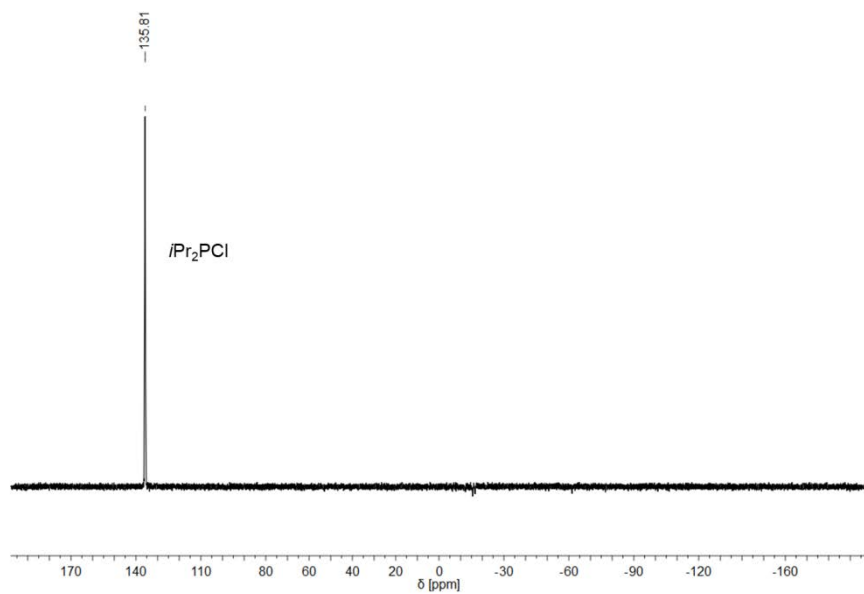

Figure S 26:  $^{31}\text{P}$  NMR spectrum of reaction of  $i\text{Pr}_2\text{PCl}$  with  $\text{PhSiH}_3$  ( $60^\circ\text{C}$ , oDFB/MeCN, after 12 hours). No 9-BBN used.

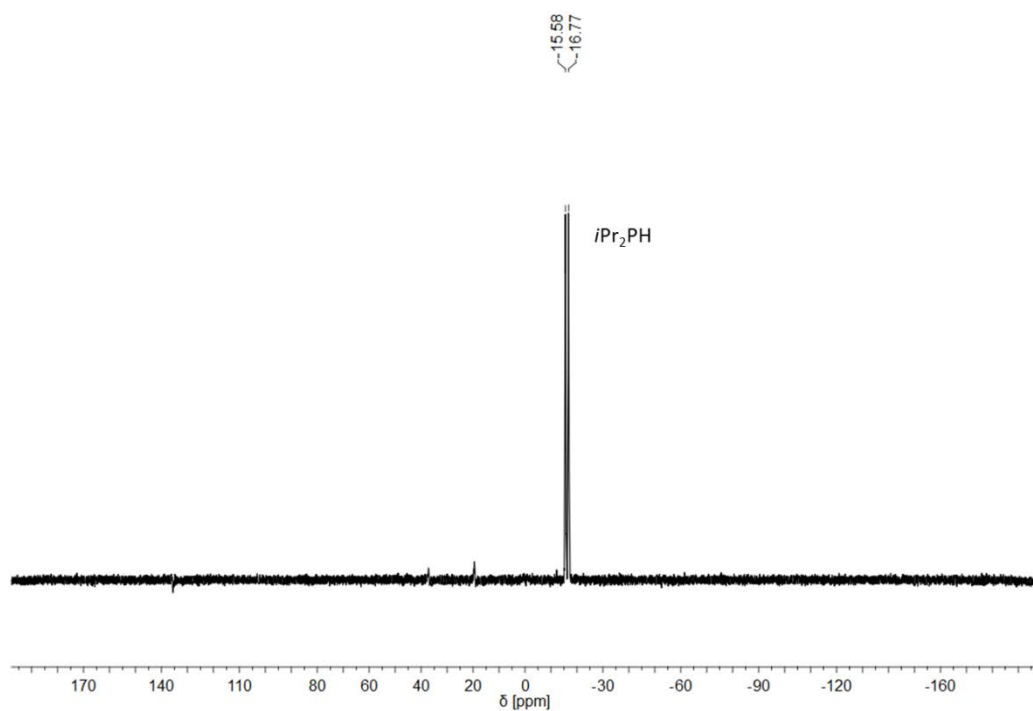

Figure S 27:  $^{31}\text{P}$  NMR spectrum of 9-BBN catalyzed reaction of  $i\text{Pr}_2\text{PCl}$  with  $\text{PhSiH}_3$  ( $60^\circ\text{C}$ , oDFB/MeCN, after 8 hours).



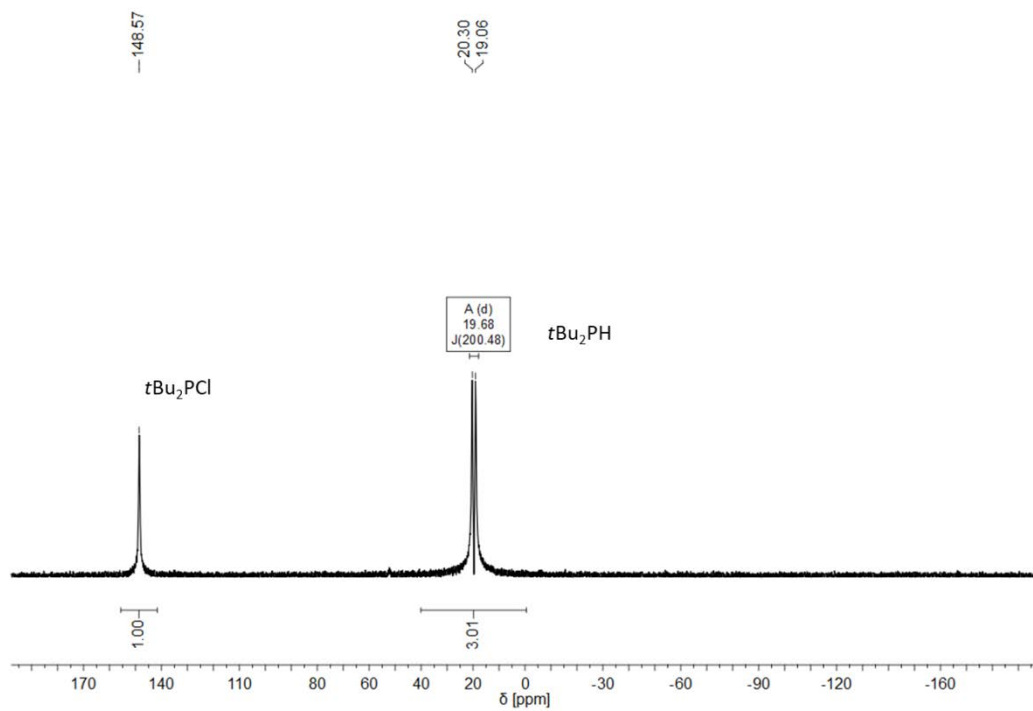

Figure S 28:  $^{31}\text{P}$  NMR spectrum of 9-BBN catalyzed reaction of  $t\text{Bu}_2\text{PCl}$  with  $\text{PhSiH}_3$  (30°C, oDFB/MeCN, after 8 days).

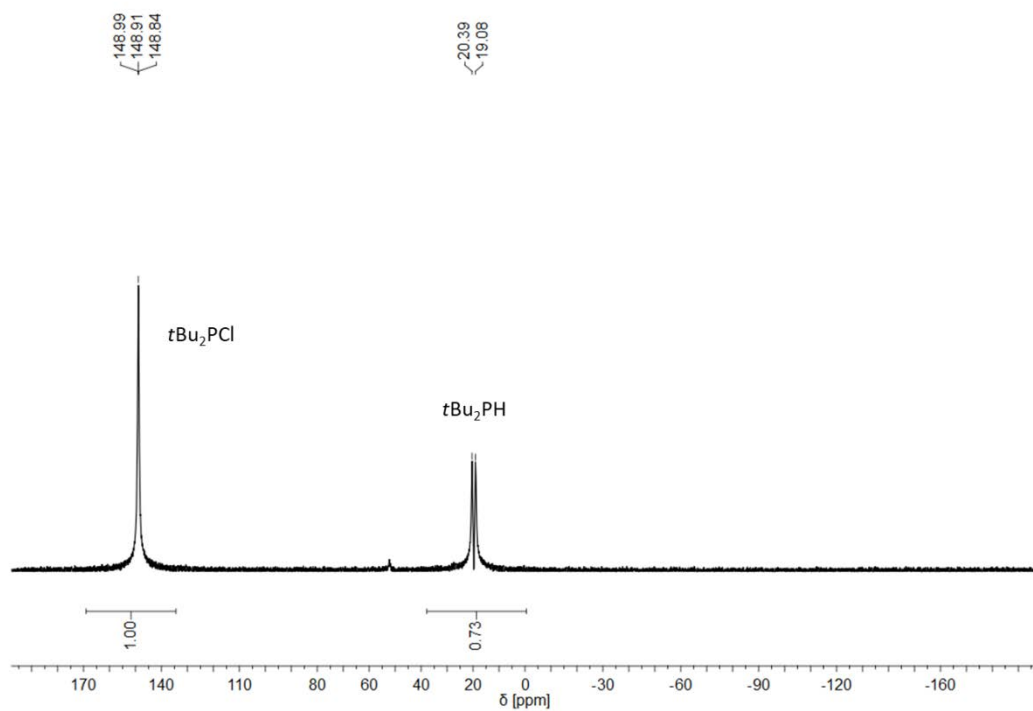

Figure S 29:  $^{31}\text{P}$  NMR spectrum of 9-BBN catalyzed reaction of  $t\text{Bu}_2\text{PCl}$  with  $\text{PhSiH}_3$  (60°C, oDFB/MeCN, after 48 hours).

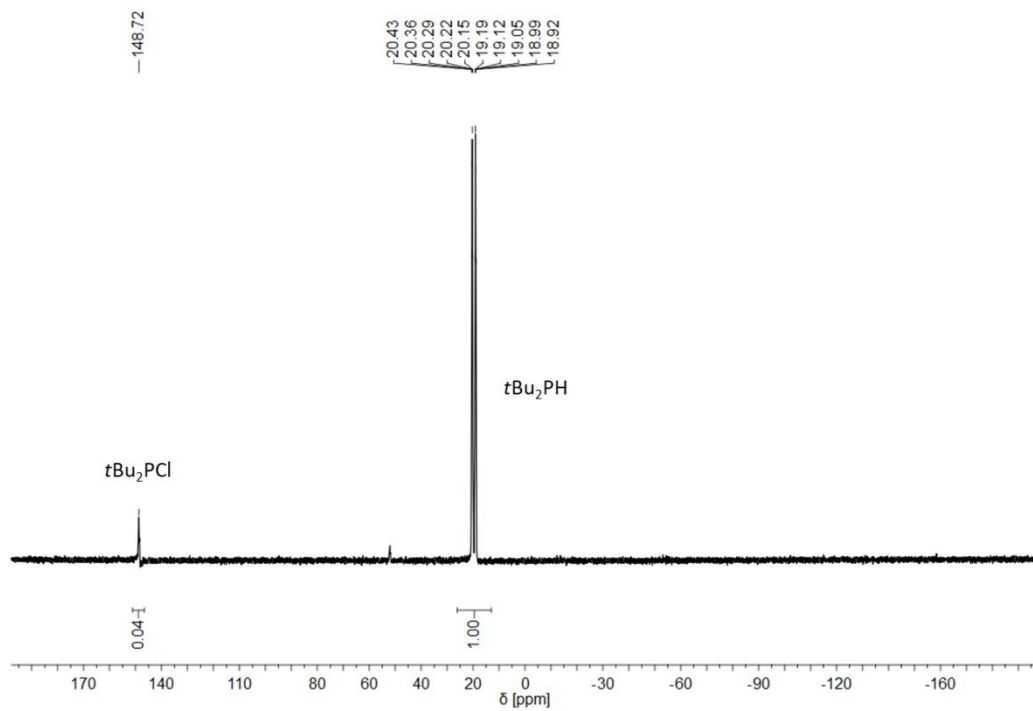

Figure S 30:  $^{31}\text{P}$  NMR spectrum of 9-BBN catalyzed reaction of  $t\text{Bu}_2\text{PCl}$  with  $\text{PhSiH}_3$  ( $80^\circ\text{C}$ , oDFB/MeCN, after 5 days).

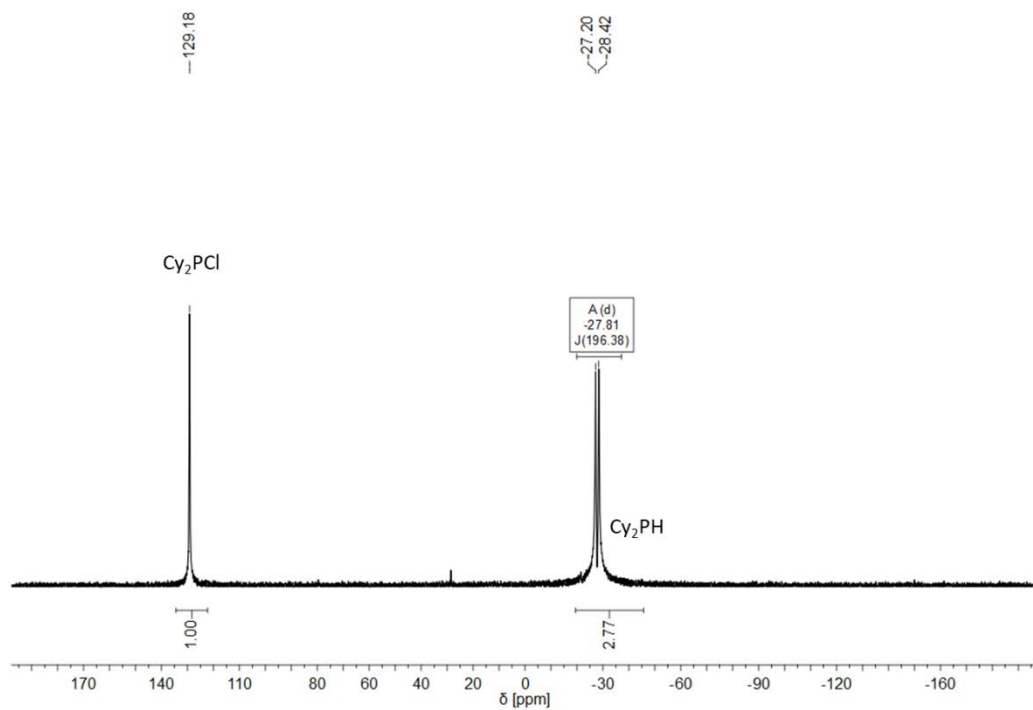

Figure S 31:  $^{31}\text{P}$  NMR spectrum of 9-BBN catalyzed reaction of  $\text{Cy}_2\text{PCl}$  with  $\text{PhSiH}_3$  ( $30^\circ\text{C}$ , MeCN/oDFB, after 38 hours).

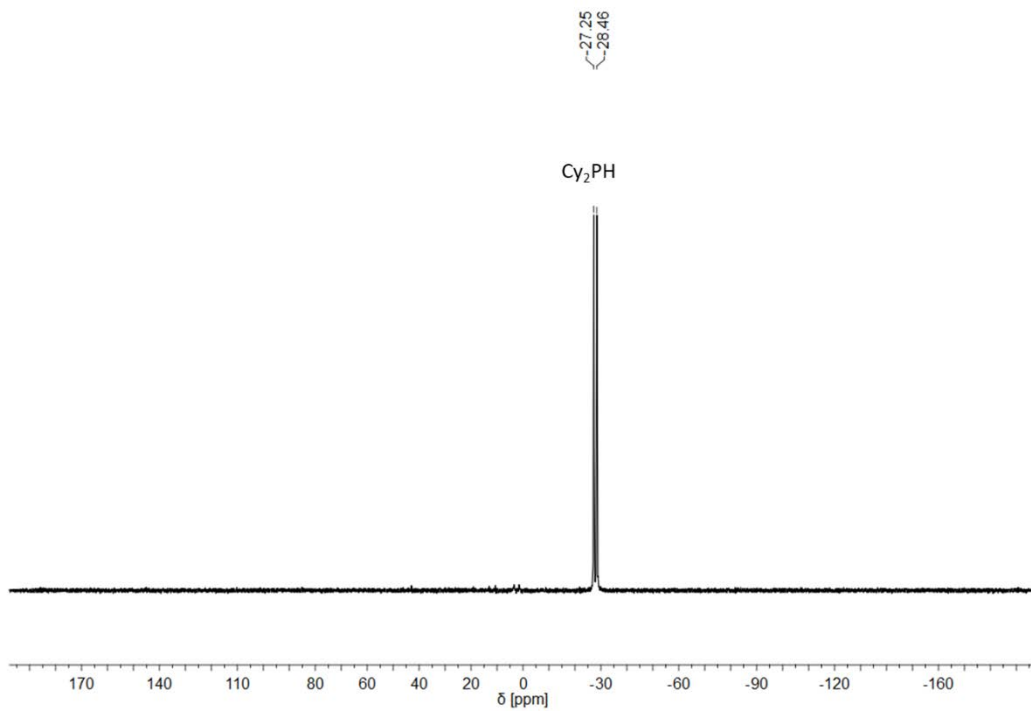

Figure S 32:  $^{31}\text{P}$  NMR spectrum of 9-BBN catalyzed reaction of  $\text{Cy}_2\text{PCL}$  with  $\text{PhSiH}_3$  ( $60^\circ\text{C}$ ,  $\text{MeCN}/\text{oDFB}$ , after 8 hours).

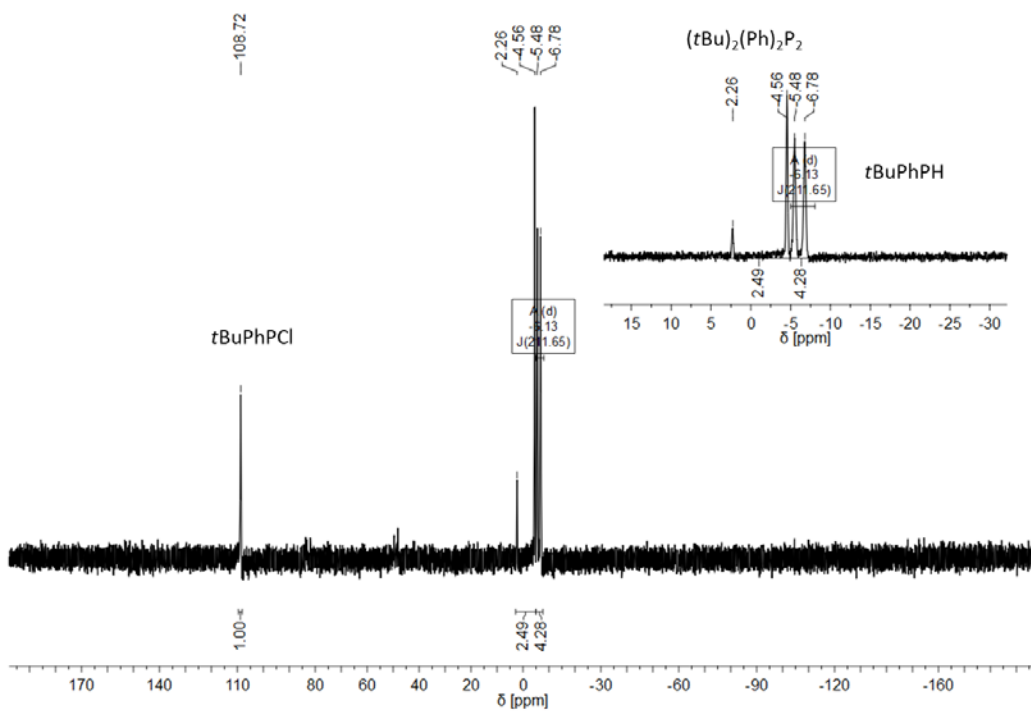

Figure S 33:  $^{31}\text{P}$  NMR spectrum of 9-BBN catalyzed reaction of  $t\text{BuPhPCL}$  with  $\text{PhSiH}_3$  ( $30^\circ\text{C}$ ,  $\text{MeCN}/\text{oDFB}$ , after 42 hours).

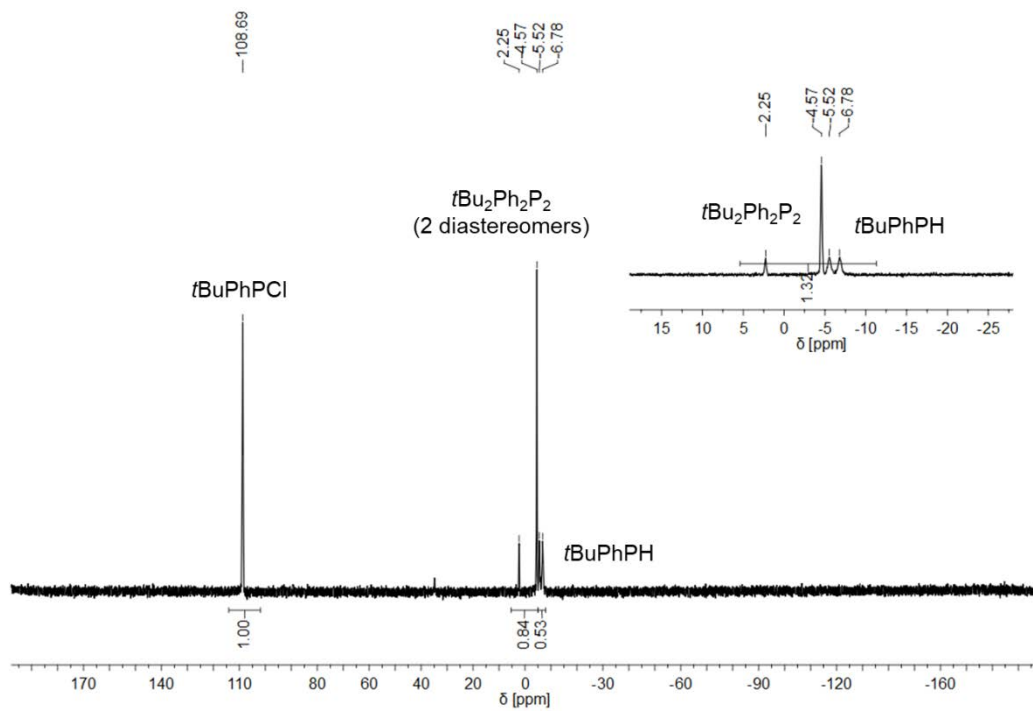

Figure S 34:  $^{31}\text{P}$  NMR spectrum of 9-BBN catalyzed reaction of  $t\text{BuPhPCI}$  with  $\text{PhSiH}_3$  (60°C, MeCN/oDFB, after 48 hours).

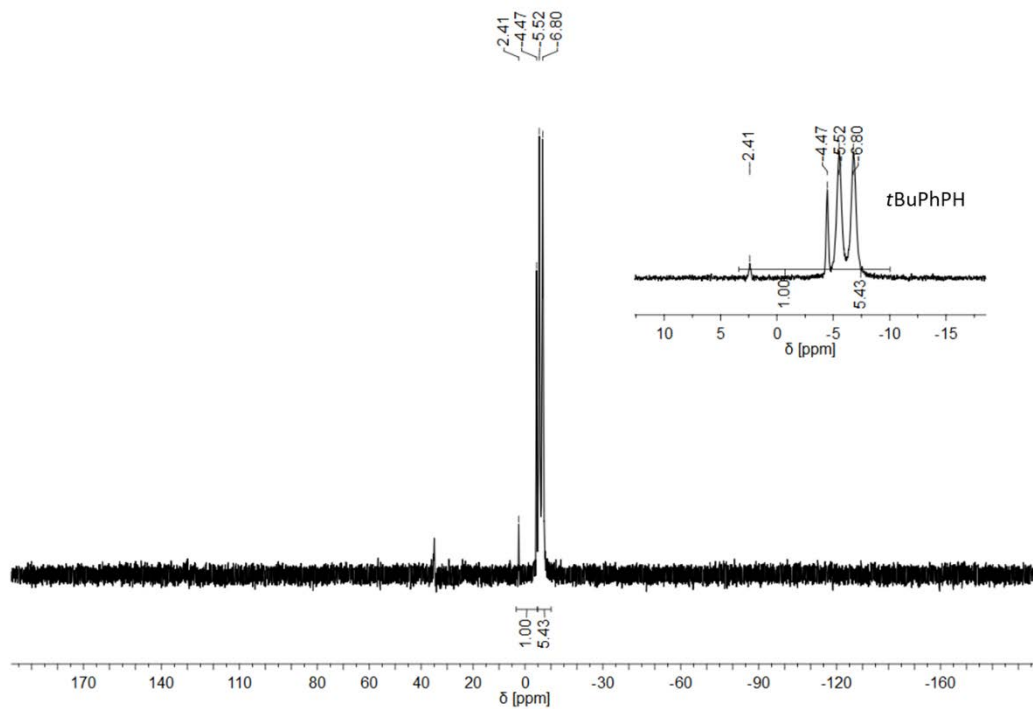

Figure S 35:  $^{31}\text{P}$  NMR spectrum of 9-BBN catalyzed reaction of  $t\text{BuPhPCI}$  with  $\text{PhSiH}_3$  (80°C, MeCN/oDFB, after 24 hours).

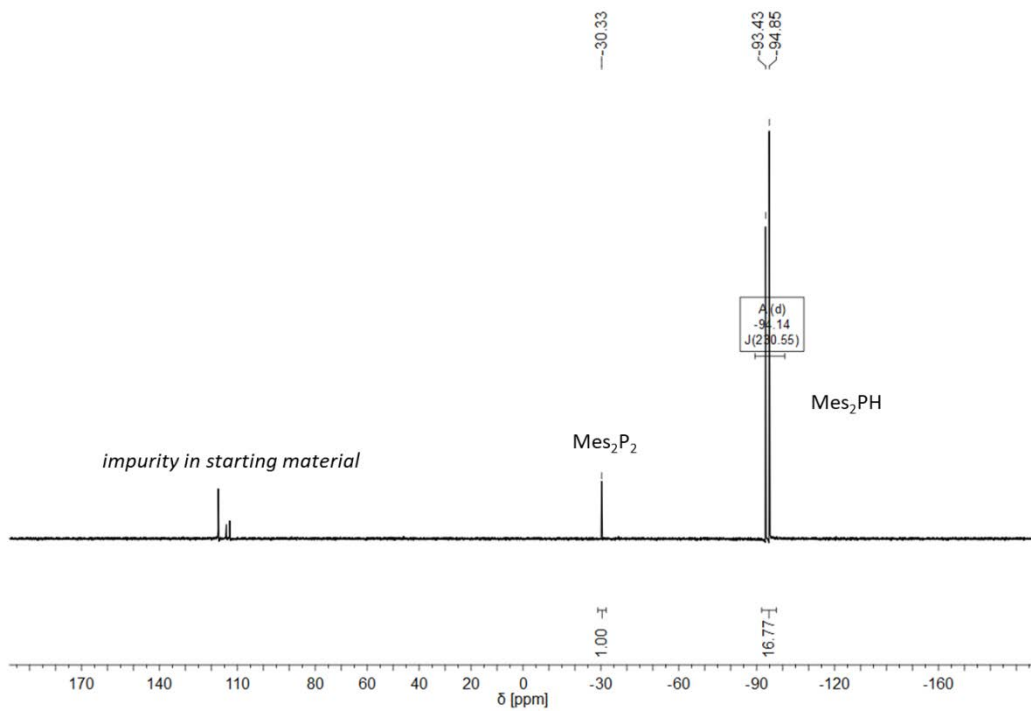

Figure S 36:  $^{31}\text{P}$  NMR spectrum of 9-BBN catalyzed reaction of  $\text{Mes}_2\text{PCl}$  with  $\text{PhSiH}_3$  (30°C, MeCN/*o*DFB, after 24 hours).

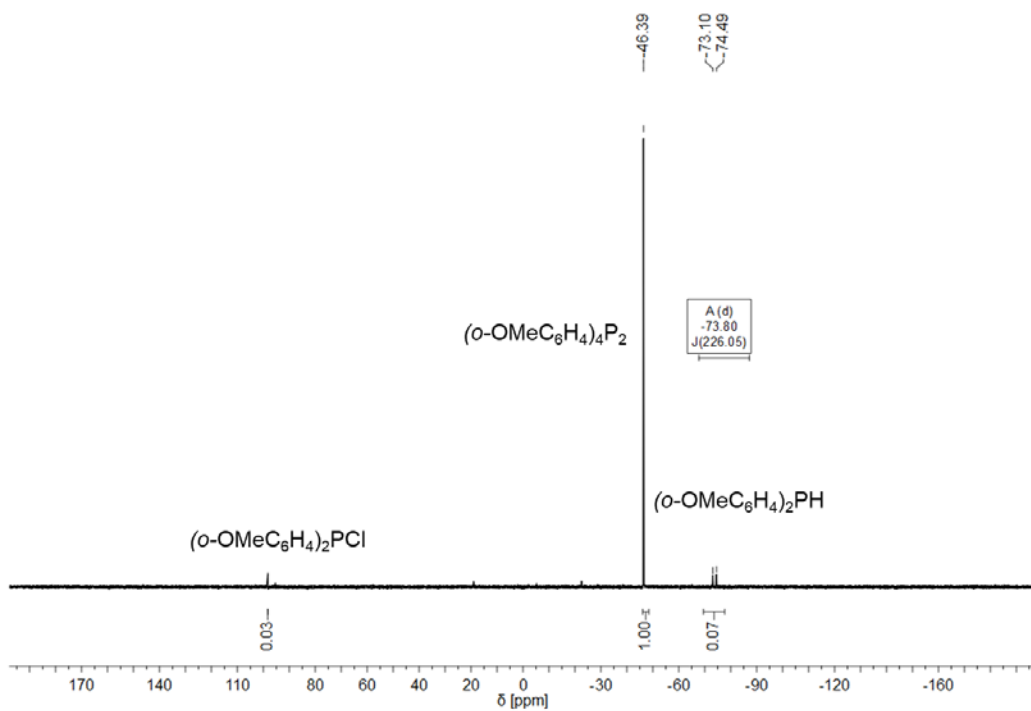

Figure S 37:  $^{31}\text{P}$  NMR spectrum of 9-BBN catalyzed reaction of  $(o\text{-OMeC}_6\text{H}_4)_2\text{PCl}$  with  $\text{PhSiH}_3$  (30°C, MeCN/*o*DFB, after 10 hours).

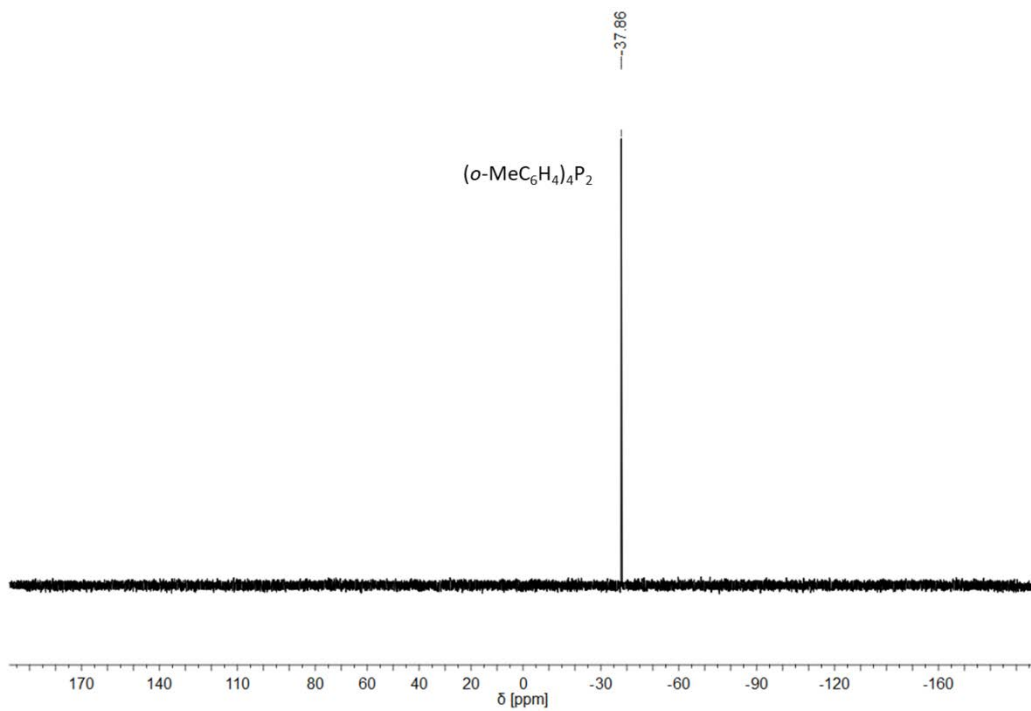

Figure S 38:  $^{31}\text{P}$  NMR spectrum of 9-BBN catalyzed reaction of  $(\text{MeC}_6\text{H}_4)_2\text{PCl}$  with  $\text{PhSiH}_3$  ( $30^\circ\text{C}$ ,  $\text{MeCN}/o\text{DFB}$ , after 7 hours).

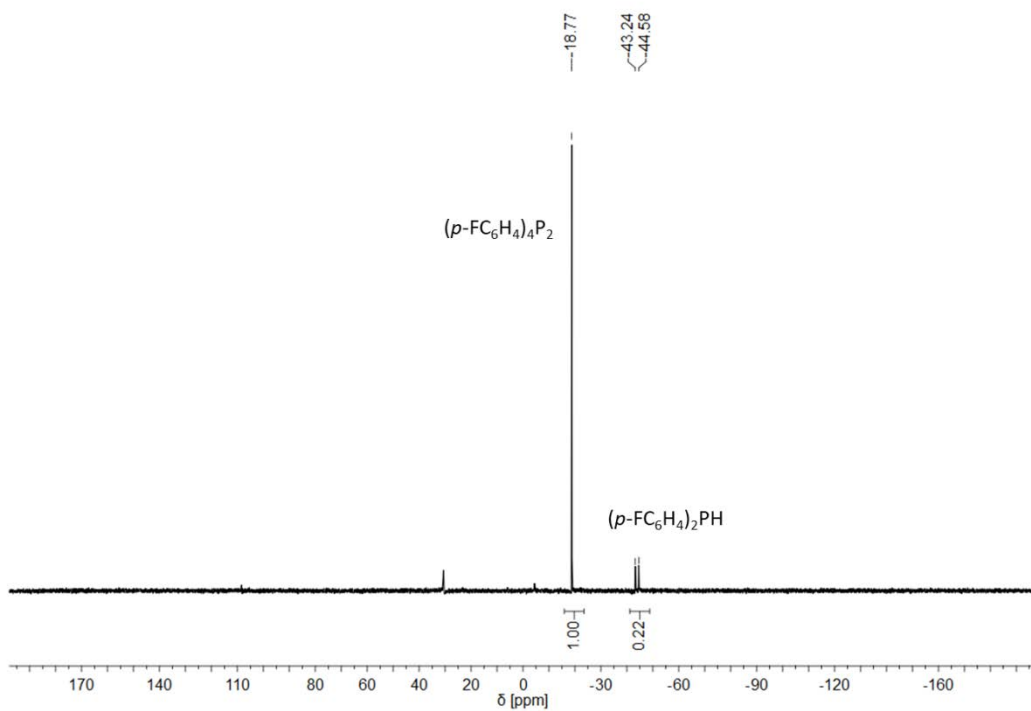

Figure S 39:  $^{31}\text{P}$  NMR spectrum of 9-BBN catalyzed reaction of  $(p\text{-FC}_6\text{H}_4)_2\text{PCl}$  with  $\text{PhSiH}_3$  ( $30^\circ\text{C}$ ,  $\text{MeCN}/o\text{DFB}$ , after 20 hours).

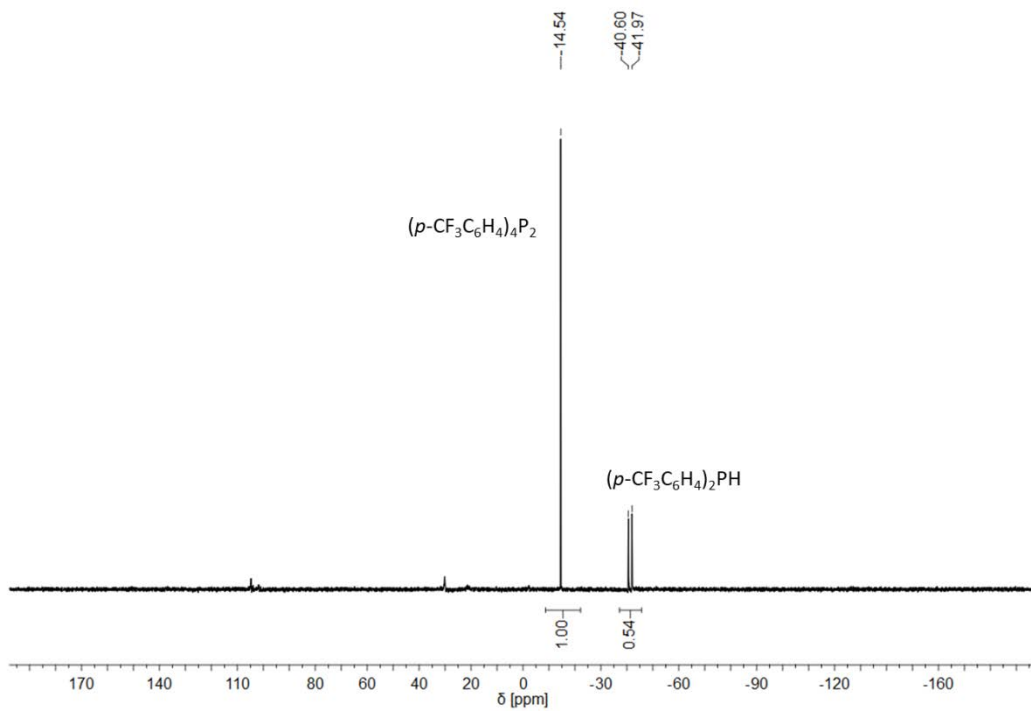

Figure S 40:  $^{31}\text{P}$  NMR spectrum of 9-BBN catalyzed reaction of  $(p\text{-CF}_3\text{C}_6\text{H}_4)_2\text{PCl}$  with  $\text{PhSiH}_3$  ( $30^\circ\text{C}$ ,  $\text{MeCN}/o\text{DFB}$ , after 20 hours).

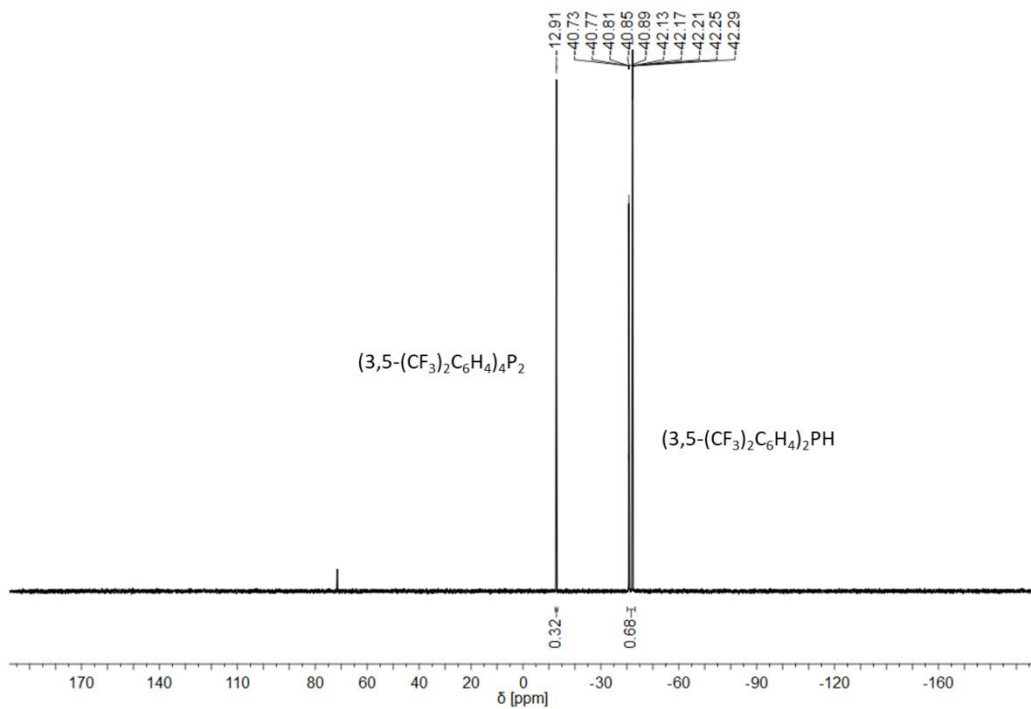

Figure S 41:  $^{31}\text{P}$  NMR spectrum of 9-BBN catalyzed reaction of  $(3,5\text{-(CF}_3)_2\text{C}_6\text{H}_3)_2\text{PCl}$  with  $\text{PhSiH}_3$  ( $30^\circ\text{C}$ ,  $\text{MeCN}/o\text{DFB}$ , after 6 hours).

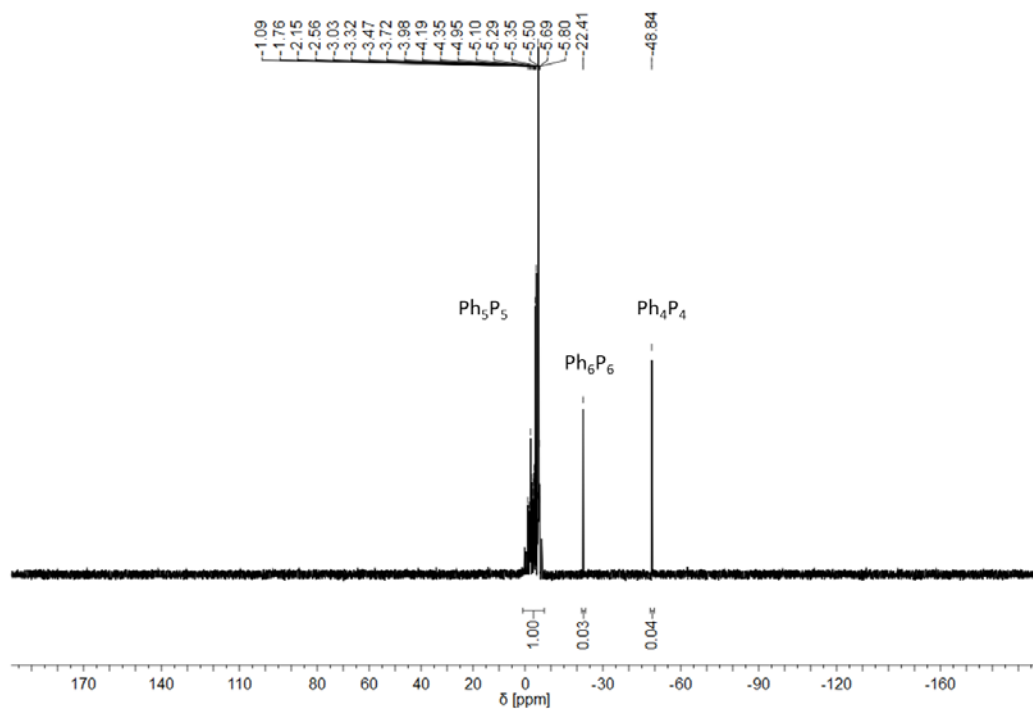

Figure S 42:  $^{31}\text{P}$  NMR spectrum of 9-BBN catalyzed reaction of  $\text{Ph}_2\text{PCL}_2$  with  $\text{PhSiH}_3$  ( $30^\circ\text{C}$ ,  $\text{MeCN}/o\text{DFB}$ , after 48 hours).

## 2.2 Lewis base ( $[\text{Et}_4\text{N}]\text{Cl}$ ) catalyzed reactions

### 2.2.1 Lewis base screening

Several Lewis bases were tested for their ability to catalyze reduction of  $\text{Ph}_2\text{PCL}_2$  to  $\text{P}_2\text{Ph}_4$  with  $\text{PhSiH}_3$ .

**General procedure:**  $\text{Ph}_2\text{PCL}_2$  (19.9 mg, 0.09 mmol, 1 equiv),  $\text{PhSiH}_3$  (9.7 mg, 0.09 mmol, 1 equiv) and Lewis base (0.05 equiv) were dissolved in a mixture of  $o\text{DFB}/\text{MeCN}$  (0.6 ml, 2/1; V/V) and heated to  $30^\circ\text{C}$ . The reaction progress was monitored by  $^{31}\text{P}$  NMR spectroscopy.

Table S 3: Catalyst screening. Conversion of  $\text{Ph}_2\text{PCL}_2$  to  $\text{Ph}_4\text{P}_2$ .

| Lewis base                                               | time [h] | conversion [%] <sup>[a]</sup> |
|----------------------------------------------------------|----------|-------------------------------|
| $[\text{nBu}_4\text{N}]\text{Cl}$                        | 3        | >99                           |
| $[\text{Et}_4\text{N}]\text{Cl}$                         | 2        | >99                           |
| $\text{LiCl}$                                            | 24       | 9                             |
| $\text{LiCl}/12\text{-crown-}4^{\text{[c]}}$             | 24       | 84                            |
| $\text{KCl}$                                             | 24       | 5                             |
| $\text{CaCl}_2$                                          | 24       | 4                             |
| $[\text{nBu}_4\text{N}][\text{Br}]$                      | 16       | 83 <sup>[b]</sup>             |
| $[\text{nBu}_4\text{N}][\text{F}_2\text{Ph}_3\text{Si}]$ | 2        | >99                           |
| $\text{DBU}$                                             | 2        | 25                            |
|                                                          | 16       | >99                           |

Reaction conditions: 0.5 mol% catalyst,  $30^\circ\text{C}$ ,  $o\text{DFB}/\text{MeCN}$  (2/1, V/V), J-Young NMR tube, 0.15 M in  $\text{Ph}_2\text{PCL}_2$ . [a] Determined by  $^{31}\text{P}$  NMR spectroscopy. [b] 20%  $\text{P}_2\text{Ph}_4$  and 80% unidentified product. [c] 0.1 equiv 12-crown-4 was added to the reaction mixture.



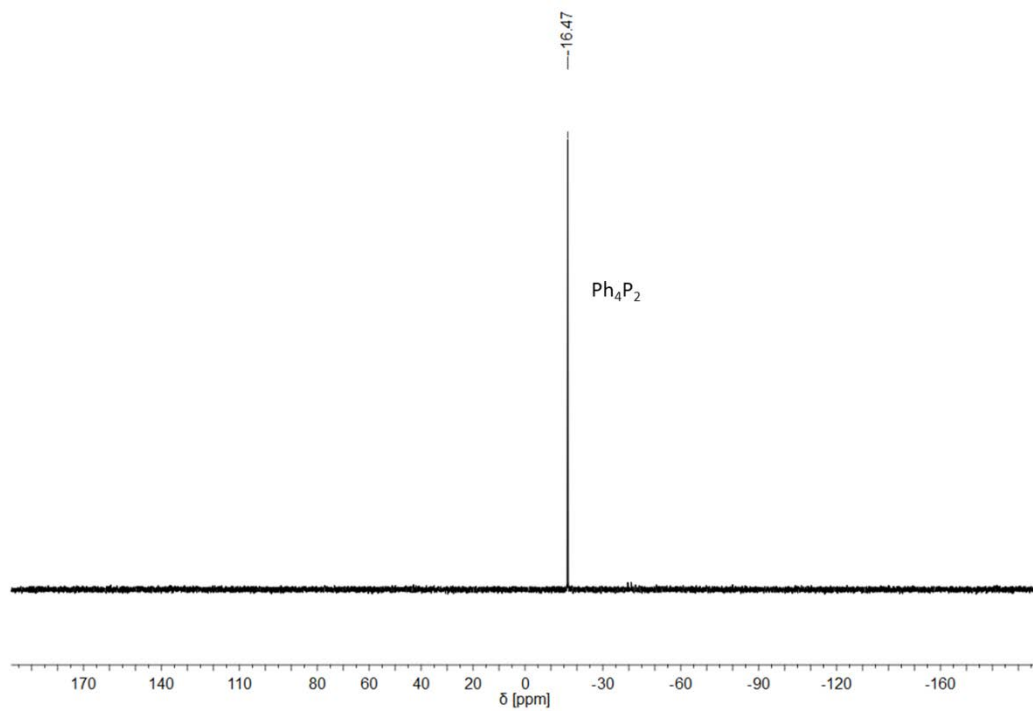

Figure S 43:  $^{31}\text{P}$  NMR spectrum of  $[\text{nBu}_4\text{N}][\text{Cl}]$  catalyzed reaction of  $\text{Ph}_2\text{PCL}$  with  $\text{PhSiH}_3$  ( $30^\circ\text{C}$ ,  $\text{oDFB}/\text{MeCN}$ , after 3 hours).

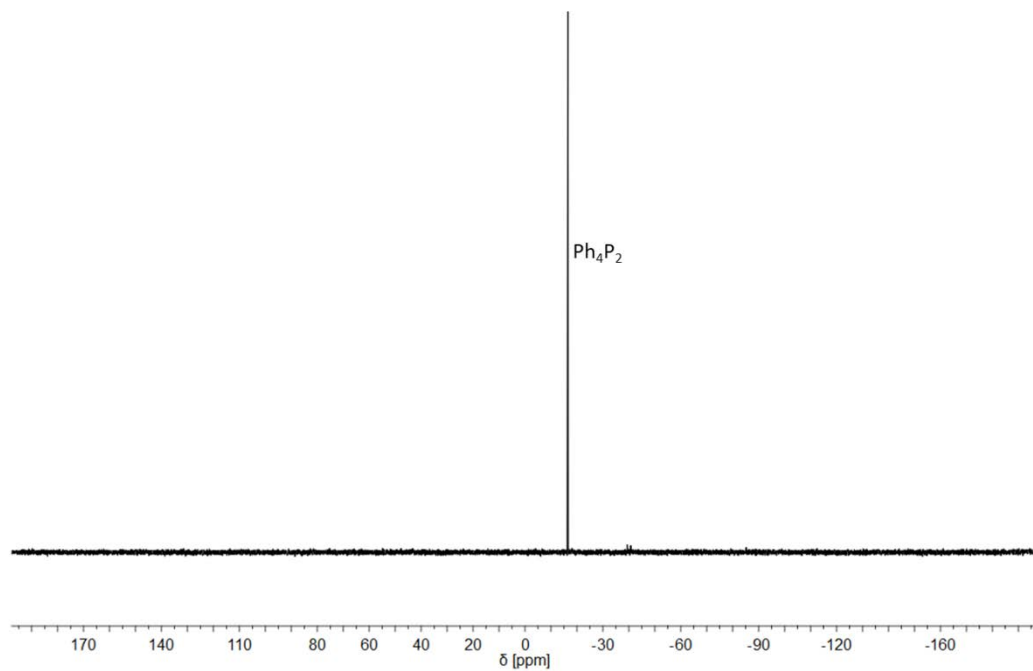

Figure S 44:  $^{31}\text{P}$  NMR spectrum of  $[\text{Et}_4\text{N}]\text{Cl}$  catalyzed reaction of  $\text{Ph}_2\text{PCL}$  with  $\text{PhSiH}_3$  ( $30^\circ\text{C}$ ,  $\text{oDFB}/\text{MeCN}$ , after 2 hours).

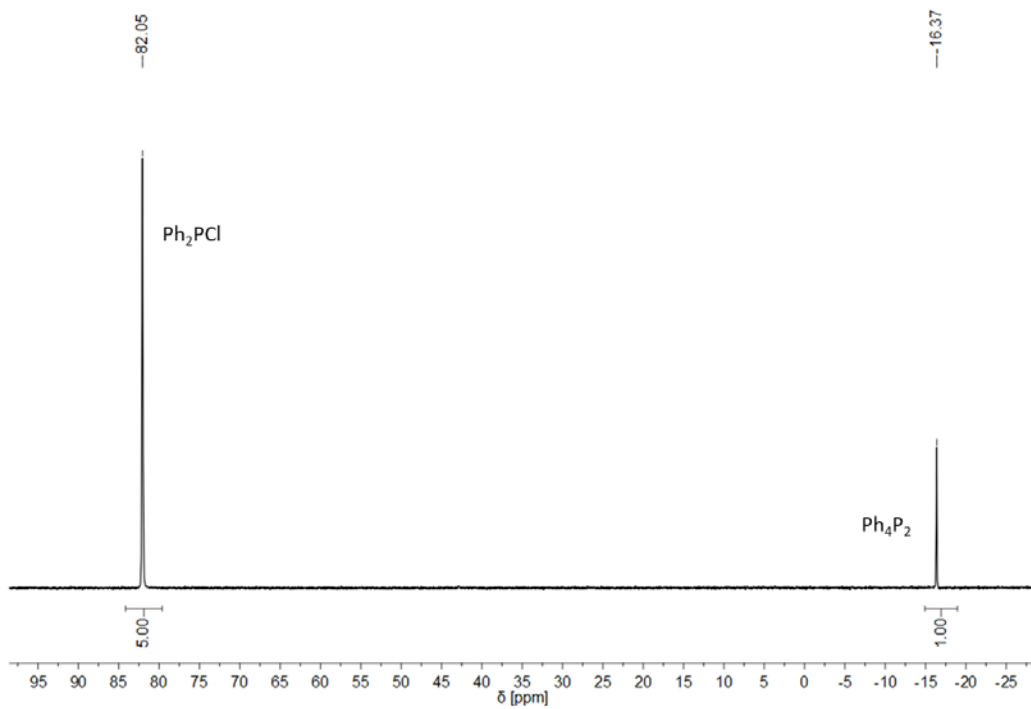

Figure S 45:  $^{31}\text{P}$  NMR spectrum of LiCl catalyzed reaction of  $\text{Ph}_2\text{PCL}$  with  $\text{PhSiH}_3$  (30°C, oDFB/MeCN, after 24 hours).

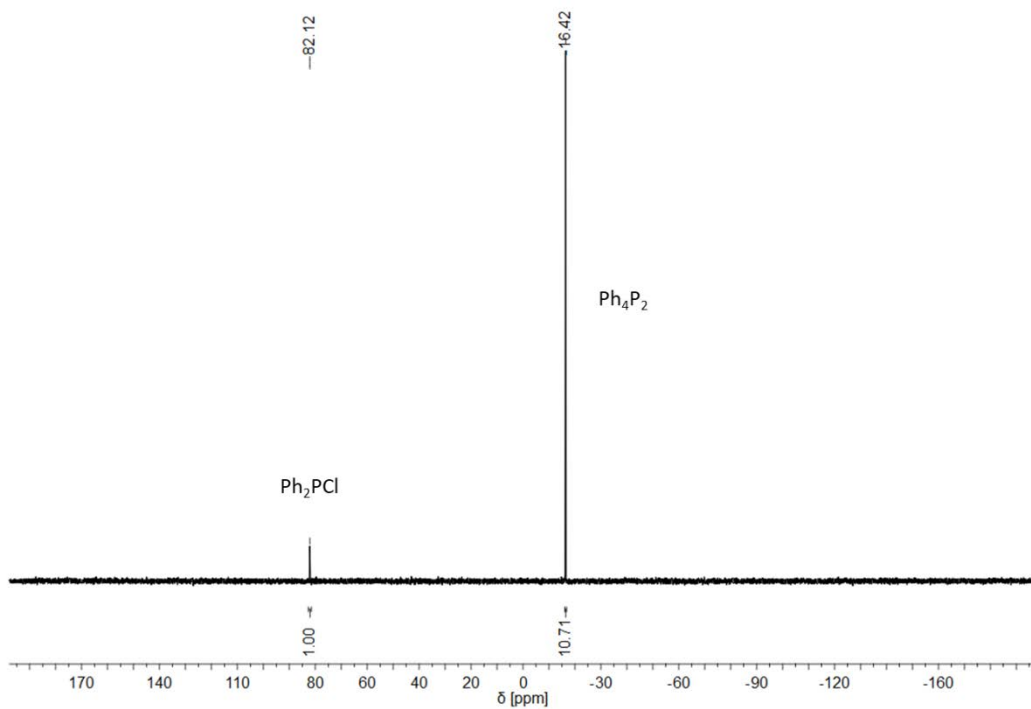

Figure S 46:  $^{31}\text{P}$  NMR spectrum of LiCl catalyzed reaction of  $\text{Ph}_2\text{PCL}$  with  $\text{PhSiH}_3$  and 12-crown-4 (30°C, oDFB/MeCN, after 24 hours).

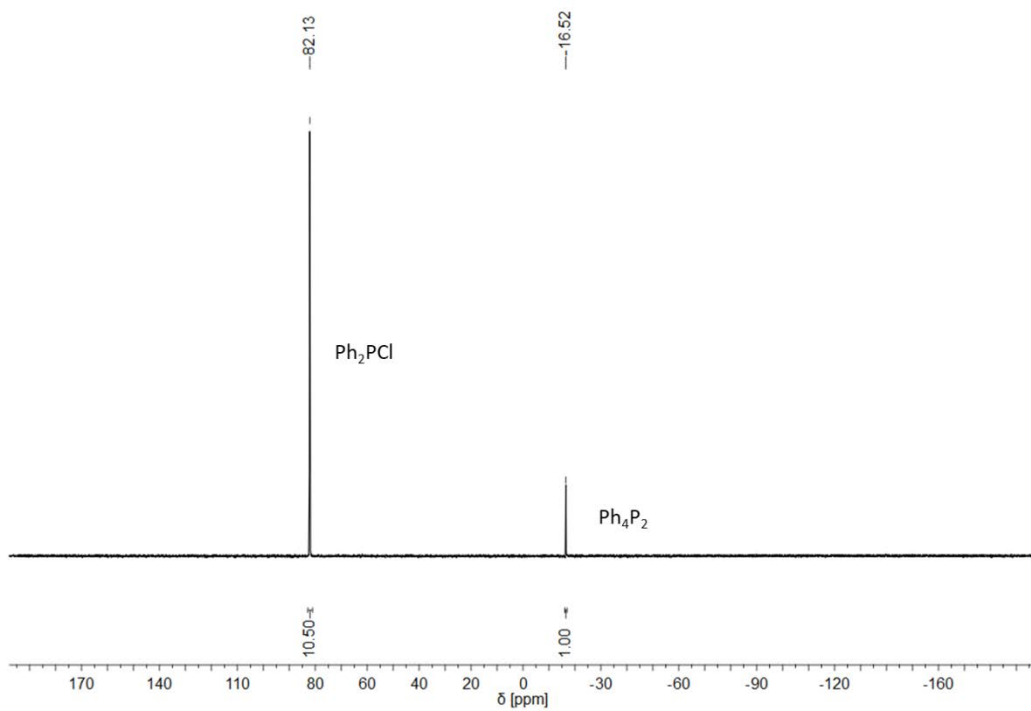

Figure S 47:  $^{31}\text{P}$  NMR spectrum of KCl catalyzed reaction of  $\text{Ph}_2\text{PCL}$  with  $\text{PhSiH}_3$  ( $30^\circ\text{C}$ ,  $\text{oDFB}/\text{MeCN}$ , after 24 hours).

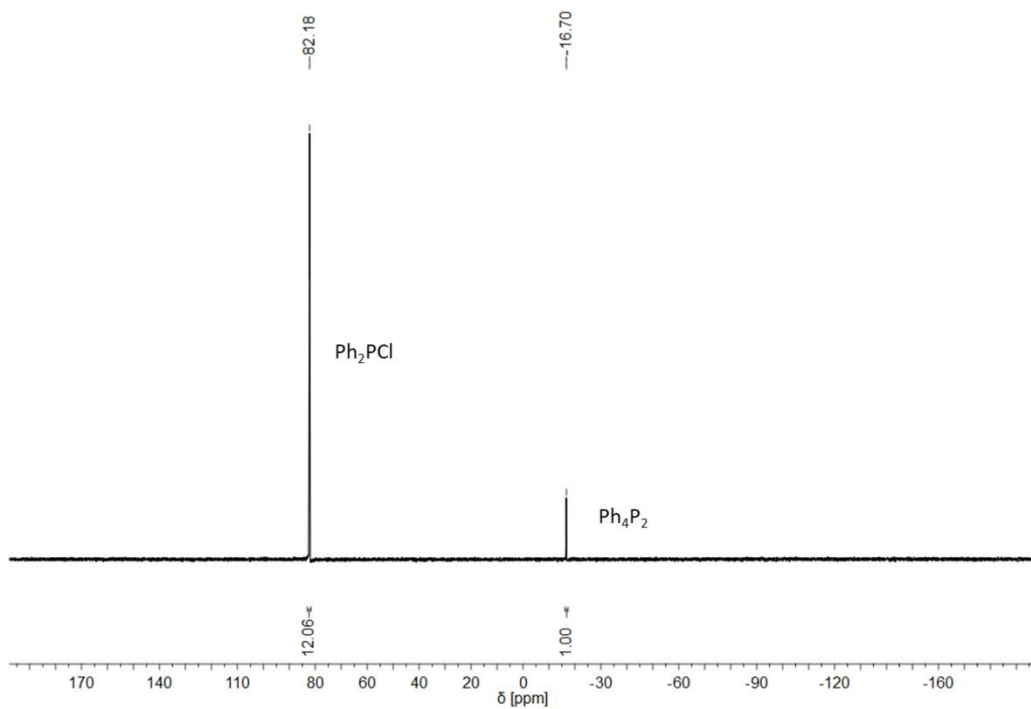

Figure S 48:  $^{31}\text{P}$  NMR spectrum of  $\text{CaCl}_2$  catalyzed reaction of  $\text{Ph}_2\text{PCL}$  with  $\text{PhSiH}_3$  ( $30^\circ\text{C}$ ,  $\text{oDFB}/\text{MeCN}$ , after 24 hours).

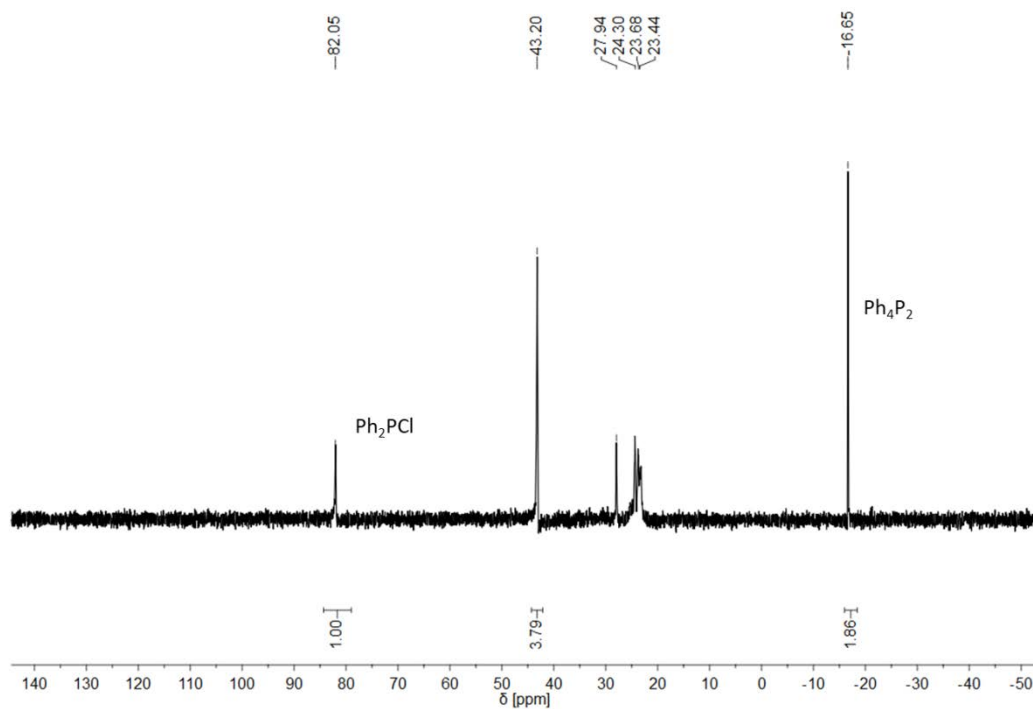

Figure S 49: <sup>31</sup>P NMR spectrum of [nBu<sub>4</sub>N][Br] catalyzed reaction of Ph<sub>2</sub>PCl with PhSiH<sub>3</sub> (30°C, oDFB/MeCN, after 16 hours).

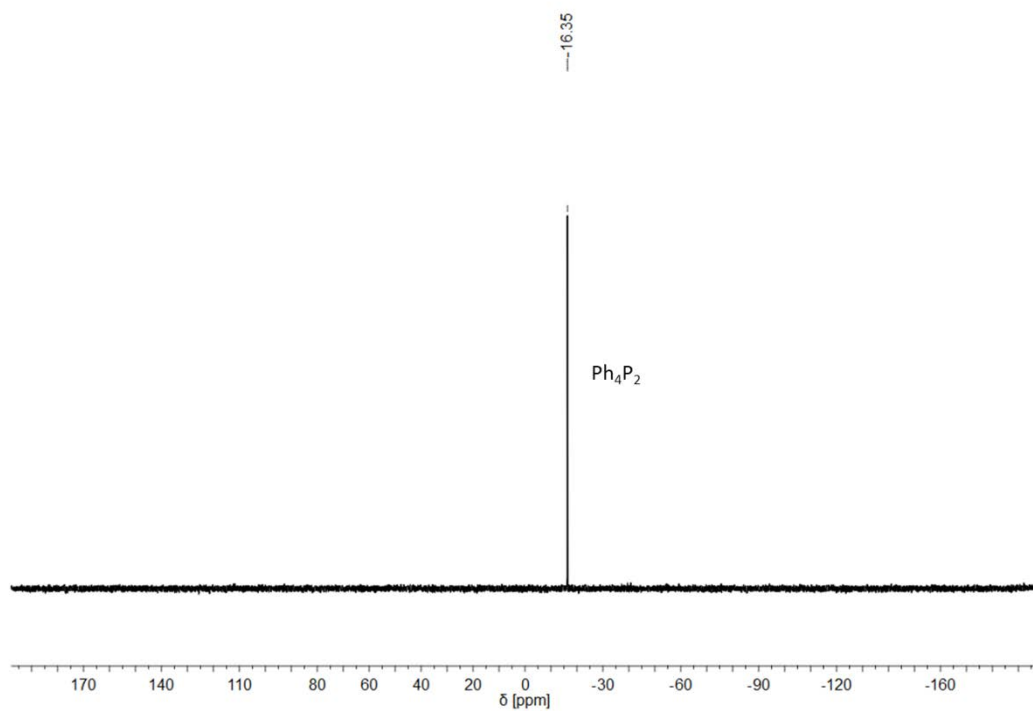

Figure S 50: <sup>31</sup>P NMR spectrum of [nBu<sub>4</sub>N][SiF<sub>2</sub>Ph<sub>3</sub>] catalyzed reaction of Ph<sub>2</sub>PCl with PhSiH<sub>3</sub> (30°C, oDFB/MeCN, after 2 hours).

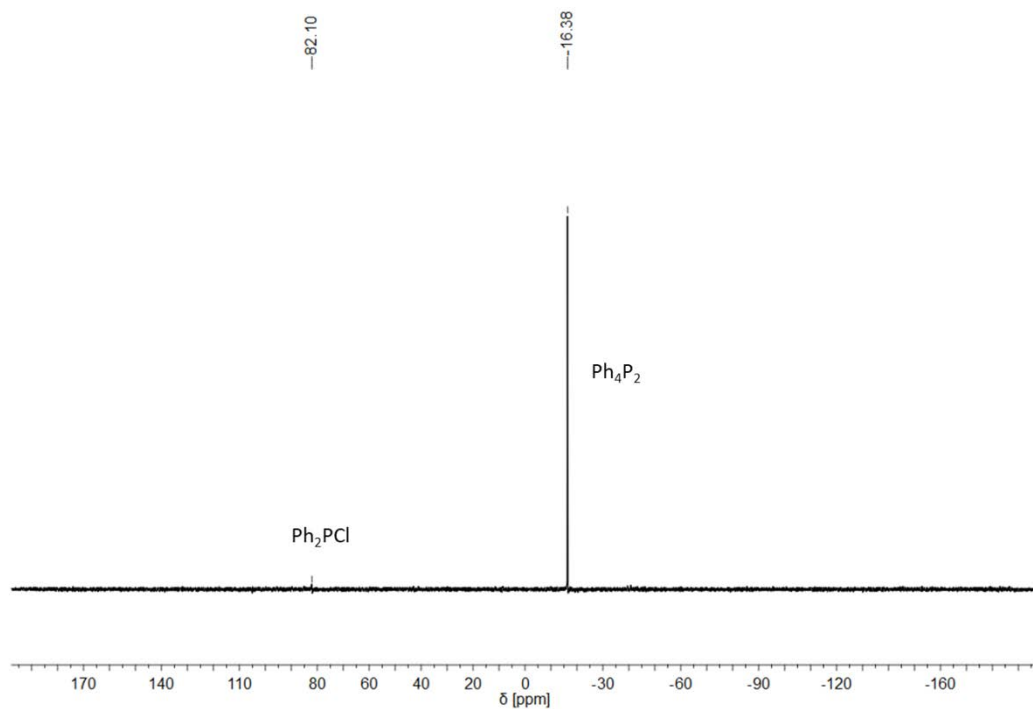

Figure S 51:  $^{31}\text{P}$  NMR spectrum of DBU catalyzed reaction of  $\text{Ph}_2\text{PCL}$  with  $\text{PhSiH}_3$  ( $30^\circ\text{C}$ ,  $o\text{DFB}/\text{MeCN}$ , after 16 hours).

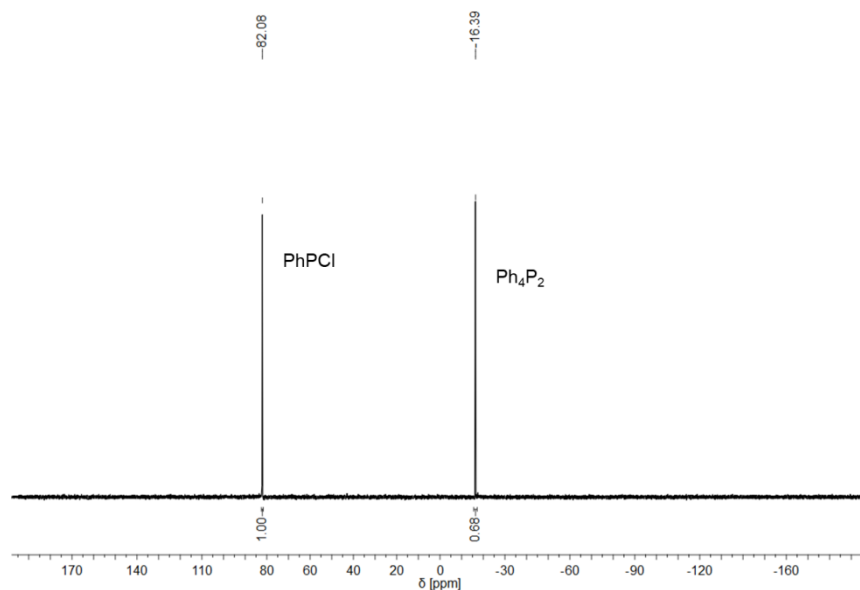

Figure S 52:  $^{31}\text{P}$  NMR spectrum of DBU catalyzed reaction of  $\text{Ph}_2\text{PCL}$  with  $\text{PhSiH}_3$  ( $30^\circ\text{C}$ ,  $o\text{DFB}/\text{MeCN}$ , after 2 hours).

### 2.2.2 Silane screening

Several silanes were screened for their ability to act as reductant in the  $[\text{Et}_4\text{N}]\text{Cl}$  catalyzed reduction of  $\text{Ph}_2\text{PCL}$  to  $\text{P}_2\text{Ph}_4$ .

**General procedure:**  $\text{Ph}_2\text{PCL}$  (19.9 mg, 0.09 mmol, 1 equiv), silane (1 equiv) and  $[\text{nBu}_4\text{N}]\text{Cl}$  (1.3 mg, 0.0045 mmol, 0.05 equiv) were dissolved in a mixture of  $o\text{DFB}/\text{MeCN}$  (0.6 ml, 2/1; V/V) and heated to  $30^\circ\text{C}$ . The reaction progress was monitored by  $^{31}\text{P}$  NMR spectroscopy.

Table S 4: Silane screening. Conversion of  $\text{Ph}_2\text{PCL}$  to  $\text{Ph}_4\text{P}_2$ .

| Silane | Time [h] | Conversion [%] <sup>[a]</sup> |
|--------|----------|-------------------------------|
|--------|----------|-------------------------------|

|                                        |    |        |
|----------------------------------------|----|--------|
| PhSiH <sub>3</sub>                     | 3  | >99    |
| Ph <sub>3</sub> SiH                    | 24 | <1     |
| Me <sub>2</sub> HSiOSiHMe <sub>2</sub> | 16 | 37 [b] |
| Et <sub>3</sub> SiH                    | 24 | 0      |
| iPr <sub>3</sub> SiH                   | 16 | 0      |

Reaction conditions: 0.5 mol% [*n*Bu<sub>4</sub>N][Cl], 30°C, J-Young NMR tube, 0.15 M in Ph<sub>2</sub>PCl, *o*DFB/MeCN, V/V, 2/1. [a] Determined by <sup>31</sup>P NMR spectroscopy. [b] No conversion to Ph<sub>4</sub>P<sub>2</sub>, conversion to two unidentified products.

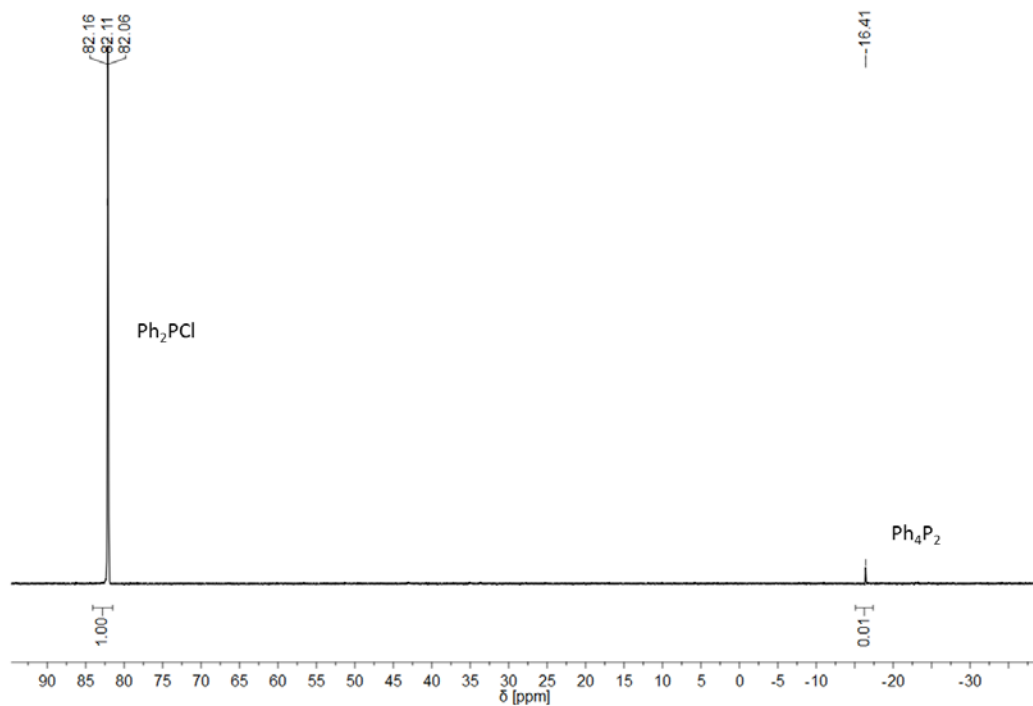

Figure S 53: <sup>31</sup>P NMR spectrum of [*n*Bu<sub>4</sub>N][Cl] catalyzed reaction of Ph<sub>2</sub>PCl with Ph<sub>3</sub>SiH (30°C, *o*DFB/MeCN, after 24 hours).

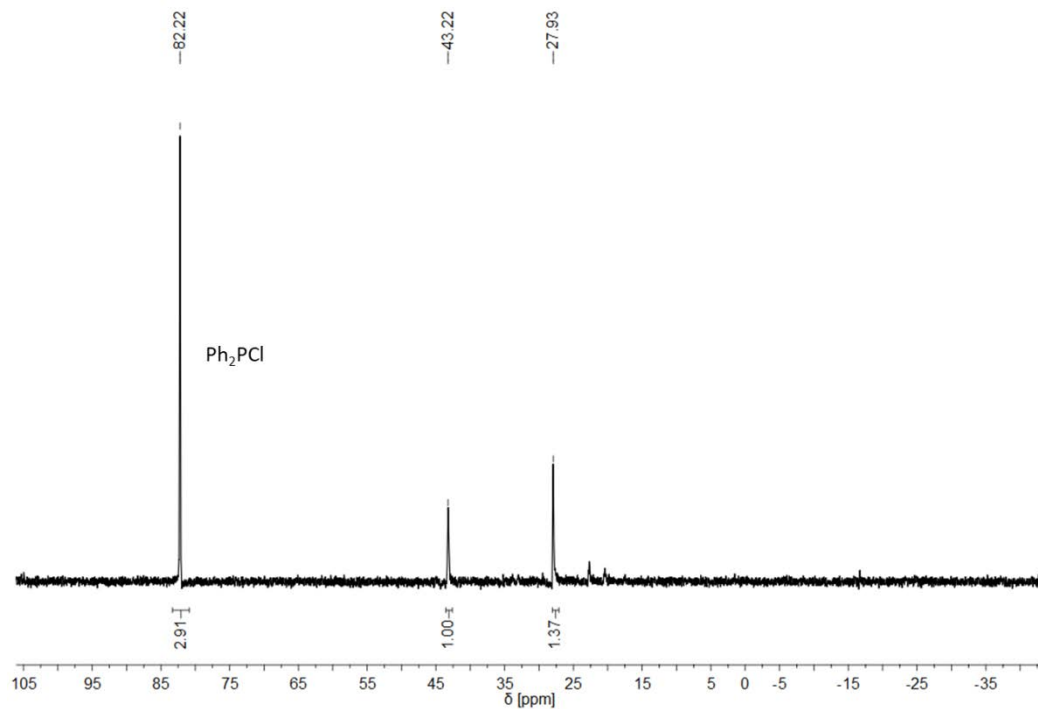

Figure S 54:  $^{31}\text{P}$  NMR spectrum of  $[\text{nBu}_4\text{N}][\text{Cl}]$  catalyzed reaction of  $\text{Ph}_2\text{PCl}$  with  $\text{HMe}_2\text{SiOSiMe}_2\text{H}$  ( $30^\circ\text{C}$ ,  $\text{oDFB}/\text{MeCN}$ , after 16 hours).

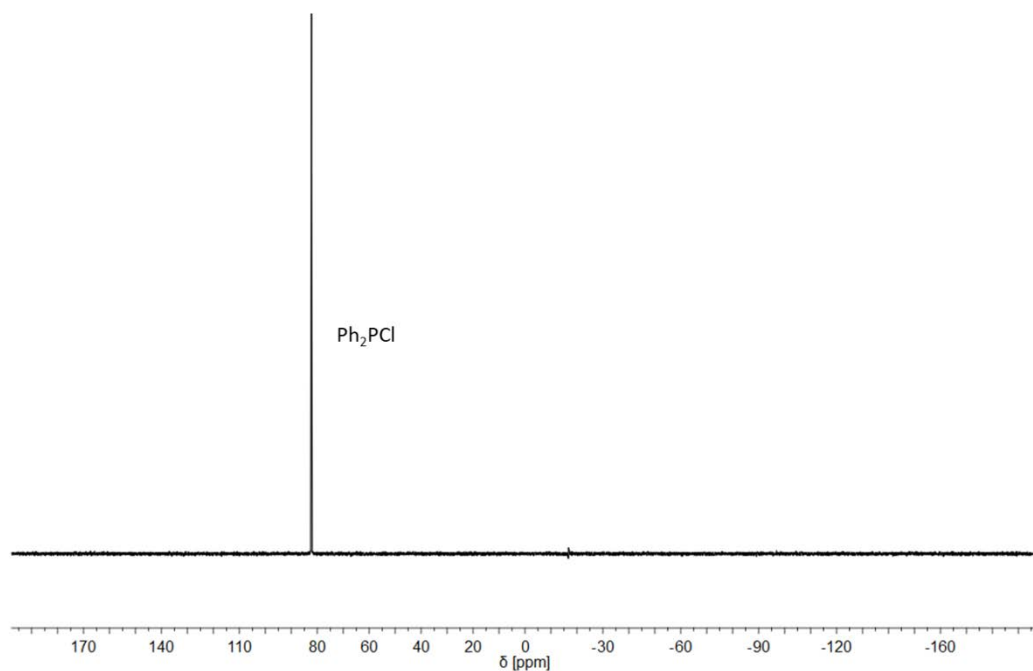

Figure S 55:  $^{31}\text{P}$  NMR spectrum of  $[\text{nBu}_4\text{N}][\text{Cl}]$  catalyzed reaction of  $\text{Ph}_2\text{PCl}$  with  $\text{Et}_3\text{SiH}$  ( $30^\circ\text{C}$ ,  $\text{oDFB}/\text{MeCN}$ , after 24 hours).

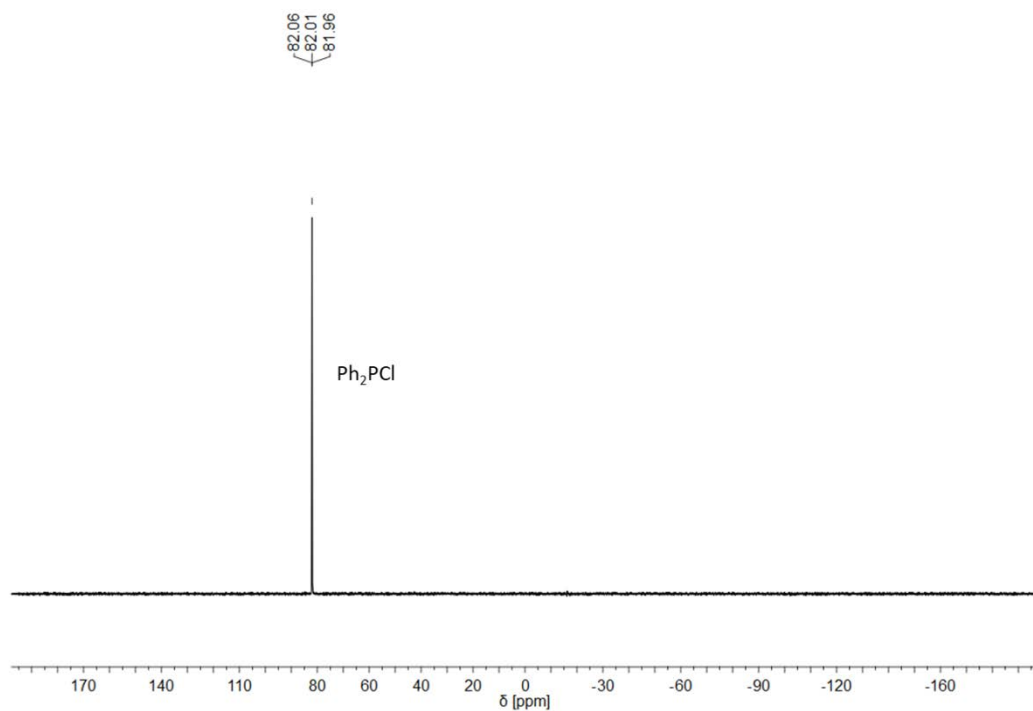

Figure S 56:  $^{31}\text{P}$  NMR spectrum of  $[\text{nBu}_4\text{N}][\text{Cl}]$  catalyzed reaction of  $\text{Ph}_2\text{PCL}$  with  $i\text{Pr}_3\text{SiH}$  ( $30^\circ\text{C}$ ,  $\text{oDFB}/\text{MeCN}$ , after 16 hours).

### 2.2.3 Solvent screening

Table S 5: Solvent screening. Conversion of  $\text{Ph}_2\text{PCL}$  to  $\text{Ph}_4\text{P}_2$ .

| Solvent                   | Time [h] | Conversion [%] <sup>[a]</sup> |
|---------------------------|----------|-------------------------------|
| $\text{oDFB}$             | 2        | 18                            |
| $\text{MeCN}$             | 2        | >99                           |
| toluene                   | 2        | 0 <sup>[b]</sup>              |
| $\text{oDFB}/\text{MeCN}$ | 2        | >99                           |

Reaction conditions: 0.5 mol%  $[\text{Et}_4\text{N}]\text{Cl}$ ,  $30^\circ\text{C}$ , J-Young NMR tube, 0.15 M in  $\text{Ph}_2\text{PCL}$ ,  $\text{oDFB}/\text{MeCN}$ , V/V, 2/1. [a] Determined by  $^{31}\text{P}$  NMR spectroscopy. [b]  $[\text{Et}_4\text{N}]\text{Cl}$  shows low solubility in toluene.



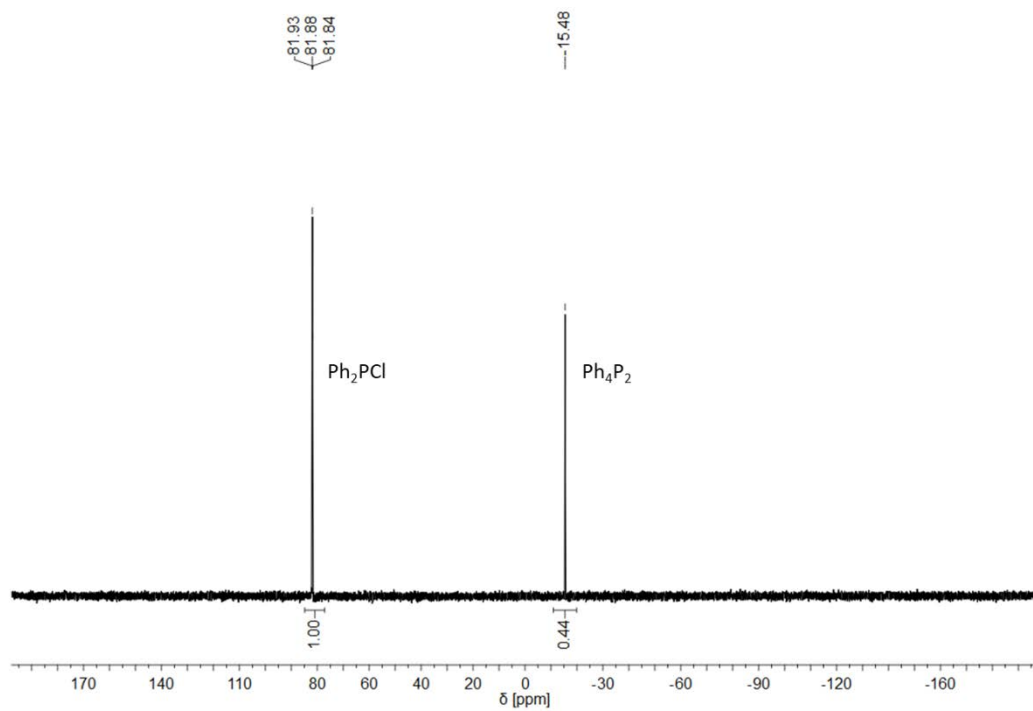

Figure S 57: <sup>31</sup>P NMR spectrum of [Et<sub>4</sub>N]Cl catalyzed reaction of Ph<sub>2</sub>PCL with PhSiH<sub>3</sub> (30°C, oDFB, after 2 hours).

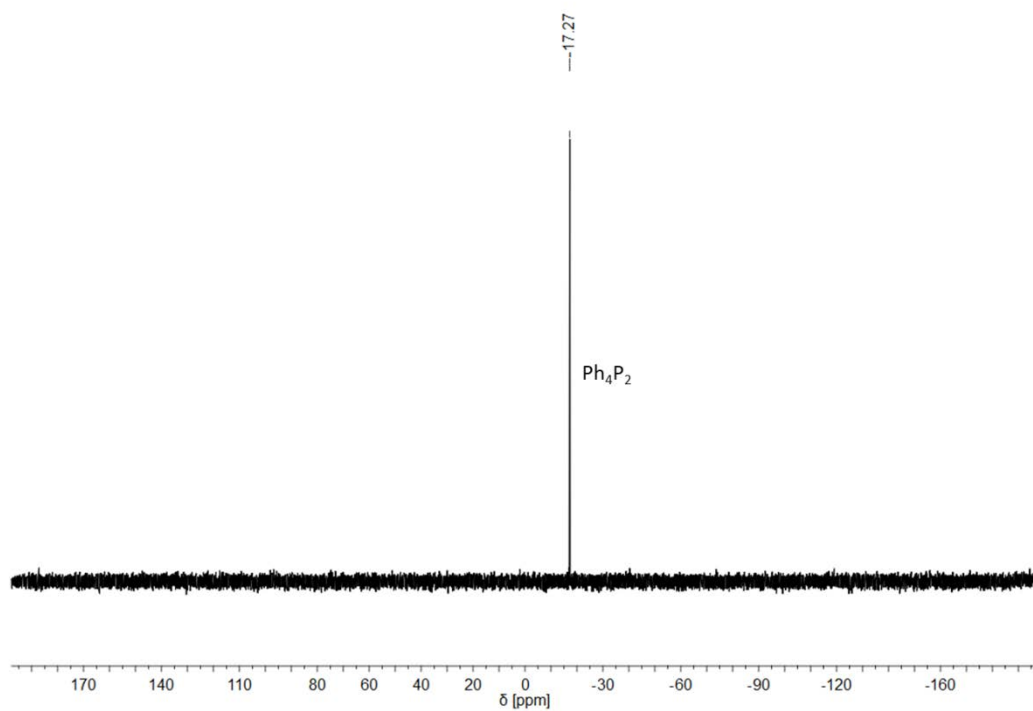

Figure S 58: <sup>31</sup>P NMR spectrum of [Et<sub>4</sub>N]Cl catalyzed reaction of Ph<sub>2</sub>PCL with PhSiH<sub>3</sub> (30°C, MeCN, after 2 hours).

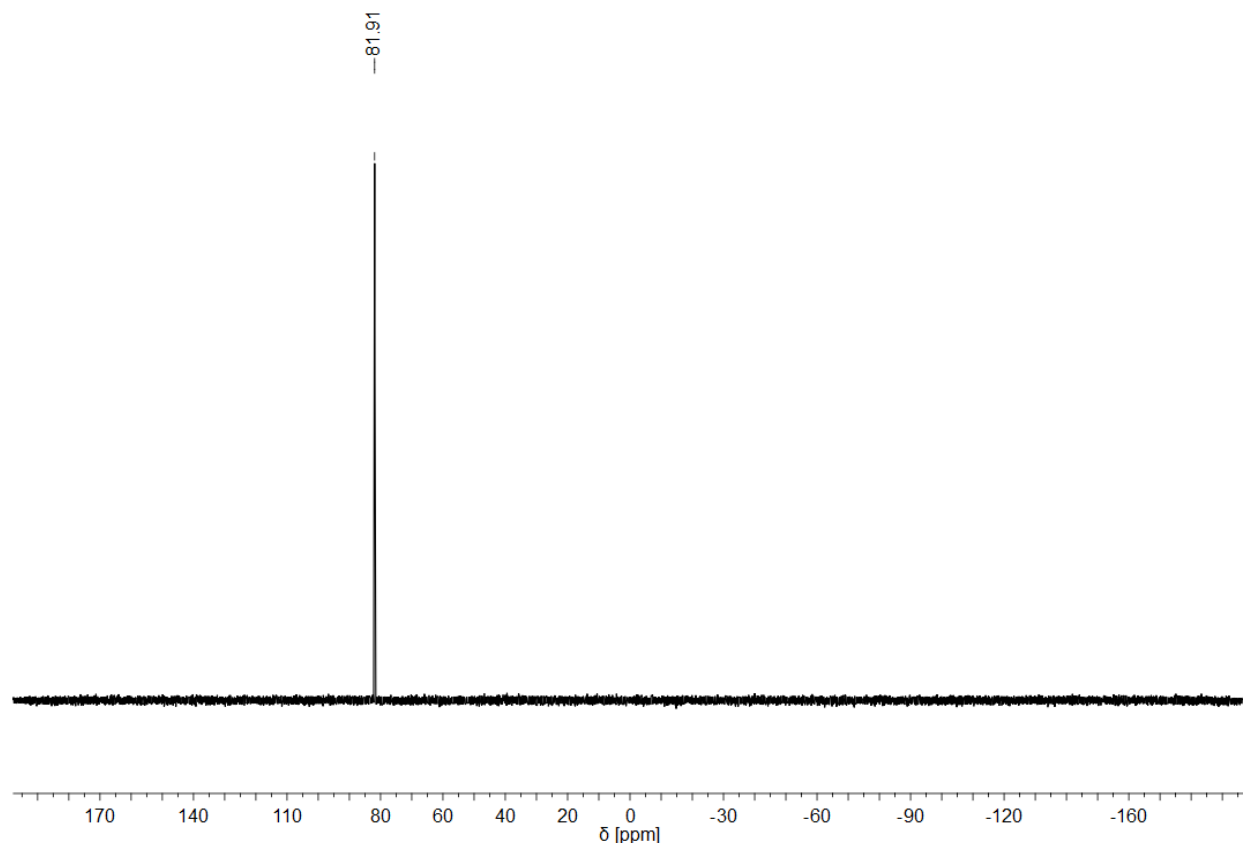

Figure S 59:  $^{31}\text{P}$  NMR spectrum of  $[\text{Et}_4\text{N}]\text{Cl}$  catalyzed reaction of  $\text{Ph}_2\text{PCL}$  with  $\text{PhSiH}_3$  (30°C, toluene, after 2 hours).

#### 2.2.4 Phosphine scope

**General procedure:**  $\text{R}_2\text{PCL}$  (0.09 mmol, 1 equiv), silane (1 equiv) and  $[\text{Et}_4\text{N}]\text{Cl}$  (0.05 equiv) were dissolved in solvent (0.6 ml) and kept at the indicated temperature in a J-Young tube. The reaction progress was monitored by  $^{31}\text{P}$  NMR spectroscopy.

Table S 6: Synthesis of  $\text{R}_2\text{PPR}_2$  from  $\text{R}_2\text{PCL}$  with  $[\text{Et}_4\text{N}]\text{Cl}$  and  $\text{PhSiH}_3$ .

| phosphine                                 | temp. [°C] | time [h] | conv. [%] | product                                                    | $\delta(^{31}\text{P})$ [ppm] (m)                          | literature $\delta(^{31}\text{P})$ [ppm]                                                    |
|-------------------------------------------|------------|----------|-----------|------------------------------------------------------------|------------------------------------------------------------|---------------------------------------------------------------------------------------------|
| $\text{Ph}_2\text{PCL}$                   | 30         | 3        | >99       | $\text{Ph}_2\text{PPPh}_2$                                 | -16.4 (s)                                                  | -16.7 ( $\text{CH}_2\text{Cl}_2$ ) <sup>8</sup>                                             |
| $i\text{Pr}_2\text{PCL}$                  | 60         | 12       | 0         | -                                                          | -16.2 (d, $^1J_{\text{PH}} = 199$ Hz)                      | -16.5 ( $^{31}\text{P}\{^1\text{H}\}$ , $\text{C}_6\text{D}_6$ ) <sup>10</sup>              |
| $\text{Cy}_2\text{PCL}$                   | 60         | 13       | 7         | $\text{Cy}_2\text{PH}$                                     | -28.5 (d, $^1J_{\text{PH}} = 195$ Hz)                      | -28.1 (d, $^1J_{\text{PH}} = 198$ Hz, $\text{CD}_3\text{CN}$ ) <sup>11</sup>                |
| $t\text{Bu}_2\text{PCL}$                  | 80         | 15       | 0         | -                                                          | 19.7 (d, $^1J_{\text{PH}} = 201$ Hz)                       | 19.5 (d, $^1J_{\text{PH}} = 203$ Hz) <sup>8</sup>                                           |
| $t\text{BuPhPCL}$                         | 80         | 15       | 0         | -                                                          | -6.1 (d, $^1J_{\text{PH}} = 212$ Hz);<br>2.4 (s), -4.6 (s) | -5.7 (d, $^1J_{\text{PH}} = 210$ Hz) <sup>8</sup> ; 1.9 <sup>8</sup> ,<br>-4.7 <sup>8</sup> |
| $(o\text{-OMeC}_6\text{H}_4)_2\text{PCL}$ | 30         | 2        | 13        | $(o\text{-OMePh})_2\text{PP}(o\text{-OMeC}_6\text{H}_4)_2$ | -46.4 (s); -73.8 (d, $^1J_{\text{PH}} = 226$ Hz)           | -46.18 ( $\text{CD}_2\text{Cl}_2$ ) <sup>12</sup> ; -                                       |
|                                           |            | 21       | 46        | $\text{OMePh}_2$                                           |                                                            | 73.2 (d, $^1J_{\text{PH}} = 226$ Hz) <sup>11</sup>                                          |
|                                           |            | 23       | 76        | (>99 %) <sup>[a]</sup> ; $(o\text{-OMePh})_2\text{PH}$     |                                                            |                                                                                             |

|                                                                                       |    |                |                 |                                                                                                                                                                                                                                                                         |                                                                                                                  |                                                                                                                                                                                  |  |
|---------------------------------------------------------------------------------------|----|----------------|-----------------|-------------------------------------------------------------------------------------------------------------------------------------------------------------------------------------------------------------------------------------------------------------------------|------------------------------------------------------------------------------------------------------------------|----------------------------------------------------------------------------------------------------------------------------------------------------------------------------------|--|
|                                                                                       |    |                |                 | (0 %) <sup>[a]</sup>                                                                                                                                                                                                                                                    |                                                                                                                  |                                                                                                                                                                                  |  |
| ( <i>o</i> -OMeC <sub>6</sub> H <sub>4</sub> ) <sub>2</sub> PCl                       | 60 | 3<br>15<br>19  | 42<br>92<br>>99 | ( <i>o</i> -OMePh) <sub>2</sub> PP( <i>o</i> -OMePh) <sub>2</sub><br>(>99 %) <sup>[b]</sup> ; ( <i>o</i> -OMePh) <sub>2</sub> PH<br>(0 %) <sup>[b]</sup>                                                                                                                |                                                                                                                  |                                                                                                                                                                                  |  |
| ( <i>o</i> -MeC <sub>6</sub> H <sub>4</sub> ) <sub>2</sub> PCl                        | 30 | 23             | 76              | ( <i>o</i> -tol) <sub>2</sub> PP( <i>o</i> -tol) <sub>2</sub><br>(>99 %) <sup>[b]</sup> ; ( <i>o</i> -tol) <sub>2</sub> PH (0 %) <sup>[b]</sup>                                                                                                                         | -37.8 (s); -56.0 (d, <sup>1</sup> J <sub>PH</sub> = 223 Hz)                                                      | -37.2 (s) <sup>12</sup> ; -59.1 (d, <sup>1</sup> J <sub>PH</sub> = 222 Hz, THF-d <sub>8</sub> ) <sup>13</sup>                                                                    |  |
| ( <i>o</i> -MeC <sub>6</sub> H <sub>4</sub> ) <sub>2</sub> PCl                        | 60 | 3<br>15        | 73<br>>99       | ( <i>o</i> -tol) <sub>2</sub> PP( <i>o</i> -tol) <sub>2</sub><br>(>99 %) <sup>[c]</sup> ; ( <i>o</i> -tol) <sub>2</sub> PH (0 %) <sup>[c]</sup>                                                                                                                         |                                                                                                                  |                                                                                                                                                                                  |  |
| (2,4,6-Me <sub>3</sub> C <sub>6</sub> H <sub>2</sub> ) <sub>2</sub> PCl               | 60 | 15<br>18<br>23 | 63<br>69<br>87  | Mes <sub>2</sub> PPMes <sub>2</sub><br>(1 %) <sup>[b]</sup> ; Mes <sub>2</sub> PH<br>(99 %) <sup>[b]</sup>                                                                                                                                                              | -30.3 (s); -94.1 (d, <sup>1</sup> J <sub>PH</sub> = 231 Hz)                                                      | -30.3 (CD <sub>2</sub> Cl <sub>2</sub> ) <sup>12</sup> ; -92.9 (d, <sup>1</sup> J <sub>PH</sub> = 229 Hz, C <sub>6</sub> D <sub>6</sub> ) <sup>14</sup>                          |  |
| ( <i>p</i> -FC <sub>6</sub> H <sub>4</sub> ) <sub>2</sub> PCl                         | 60 | 3              | >99             | ( <i>p</i> -FC <sub>6</sub> H <sub>4</sub> ) <sub>2</sub> PP( <i>p</i> -FC <sub>6</sub> H <sub>4</sub> ) <sub>2</sub> (91 %); ( <i>p</i> -FC <sub>6</sub> H <sub>4</sub> ) <sub>2</sub> PH (9 %)                                                                        | -18.77 (s); -43.9 (d, <sup>1</sup> J <sub>PH</sub> = 221 Hz)                                                     | -16.8 (C <sub>6</sub> D <sub>6</sub> ) <sup>15</sup> ; -44.2 ( <sup>1</sup> J <sub>PH</sub> = 221 Hz, CD <sub>3</sub> CN) <sup>11</sup>                                          |  |
| ( <i>p</i> -FC <sub>6</sub> H <sub>4</sub> ) <sub>2</sub> PCl                         | 30 | 2              | >99             | ( <i>p</i> -FC <sub>6</sub> H <sub>4</sub> ) <sub>2</sub> PP( <i>p</i> -FC <sub>6</sub> H <sub>4</sub> ) <sub>2</sub> (>99); ( <i>p</i> -FC <sub>6</sub> H <sub>4</sub> ) <sub>2</sub> PH (-)                                                                           |                                                                                                                  |                                                                                                                                                                                  |  |
| ( <i>p</i> -CF <sub>3</sub> C <sub>6</sub> H <sub>4</sub> ) <sub>2</sub> PCl          | 60 | 3              | >99             | ( <i>p</i> -CF <sub>3</sub> C <sub>6</sub> H <sub>4</sub> ) <sub>2</sub> PP( <i>p</i> -CF <sub>3</sub> C <sub>6</sub> H <sub>4</sub> ) <sub>2</sub> (77%); ( <i>p</i> -CF <sub>3</sub> C <sub>6</sub> H <sub>4</sub> ) <sub>2</sub> PH (23%)                            | -14.5 (s), -41.3 (d, <sup>1</sup> J <sub>PH</sub> = 222 Hz)                                                      | -13.2 (C <sub>6</sub> D <sub>6</sub> ) <sup>15</sup> ; -42.7 ( <sup>31</sup> P{ <sup>1</sup> H}) <sup>16</sup>                                                                   |  |
| ( <i>p</i> -CF <sub>3</sub> C <sub>6</sub> H <sub>4</sub> ) <sub>2</sub> PCl          | 30 | 2              | >99             | ( <i>p</i> -CF <sub>3</sub> C <sub>6</sub> H <sub>4</sub> ) <sub>2</sub> PP( <i>p</i> -CF <sub>3</sub> C <sub>6</sub> H <sub>4</sub> ) <sub>2</sub> (76 %); ( <i>p</i> -CF <sub>3</sub> C <sub>6</sub> H <sub>4</sub> ) <sub>2</sub> PH (24 %)                          |                                                                                                                  |                                                                                                                                                                                  |  |
| (3,5-(CF <sub>3</sub> ) <sub>2</sub> C <sub>6</sub> H <sub>4</sub> ) <sub>2</sub> PCl | 60 | 2              | >99             | (3,5-(CF <sub>3</sub> ) <sub>2</sub> C <sub>6</sub> H <sub>4</sub> ) <sub>2</sub> PP(3,5-(CF <sub>3</sub> ) <sub>2</sub> C <sub>6</sub> H <sub>4</sub> ) <sub>2</sub> (21%); (3,5-(CF <sub>3</sub> ) <sub>2</sub> C <sub>6</sub> H <sub>4</sub> ) <sub>2</sub> PH (79%) | -12.9 (s), -41.5 (d, <sup>1</sup> J <sub>PH</sub> = 227 Hz)                                                      | -12.6 (THF-d <sub>8</sub> ) <sup>19</sup> ; -40.4 (d, <sup>1</sup> J <sub>PH</sub> = 229 Hz, CDCl <sub>3</sub> ) <sup>13</sup>                                                   |  |
| (3,5-(CF <sub>3</sub> ) <sub>2</sub> C <sub>6</sub> H <sub>4</sub> ) <sub>2</sub> PCl | 30 | 2              | >99             | (3,5-(CF <sub>3</sub> ) <sub>2</sub> C <sub>6</sub> H <sub>4</sub> ) <sub>2</sub> PP(3,5-(CF <sub>3</sub> ) <sub>2</sub> C <sub>6</sub> H <sub>4</sub> ) <sub>2</sub> (23%); (3,5-(CF <sub>3</sub> ) <sub>2</sub> C <sub>6</sub> H <sub>4</sub> ) <sub>2</sub> PH (77%) | -14.5 (s), -41.3 (d, <sup>1</sup> J <sub>PH</sub> = 222 Hz)                                                      | -13.2 (C <sub>6</sub> D <sub>6</sub> ) <sup>15</sup> ; -42.7 ( <sup>31</sup> P{ <sup>1</sup> H}) <sup>16</sup>                                                                   |  |
| PhPCl <sub>2</sub>                                                                    | 30 | 2              | >99             | Ph <sub>5</sub> P <sub>5</sub> (83%)<br>Ph <sub>4</sub> P <sub>4</sub> (15%)<br>Ph <sub>6</sub> P <sub>6</sub> (2%)                                                                                                                                                     | Ph <sub>5</sub> P <sub>5</sub> -4 (m) Ph <sub>4</sub> P <sub>4</sub> -48.8; Ph <sub>6</sub> P <sub>6</sub> -22.4 | Ph <sub>5</sub> P <sub>5</sub> -3 (m) <sup>18</sup> ; Ph <sub>4</sub> P <sub>4</sub> -48 (CH <sub>2</sub> Cl <sub>2</sub> ) <sup>18</sup> ; Ph <sub>6</sub> P <sub>6</sub> -21.2 |  |

Reaction conditions: 5 mol%  $[Et_4N]Cl$ , 1 equiv  $PhSiH_3$ , 0.15 M  $(R_2)PCl$  in  $oDFB/MeCN$  (2/1;V/V). [a] Values after 21 hours. [b] Values after 19 hours. [c] Values after 15 hours.

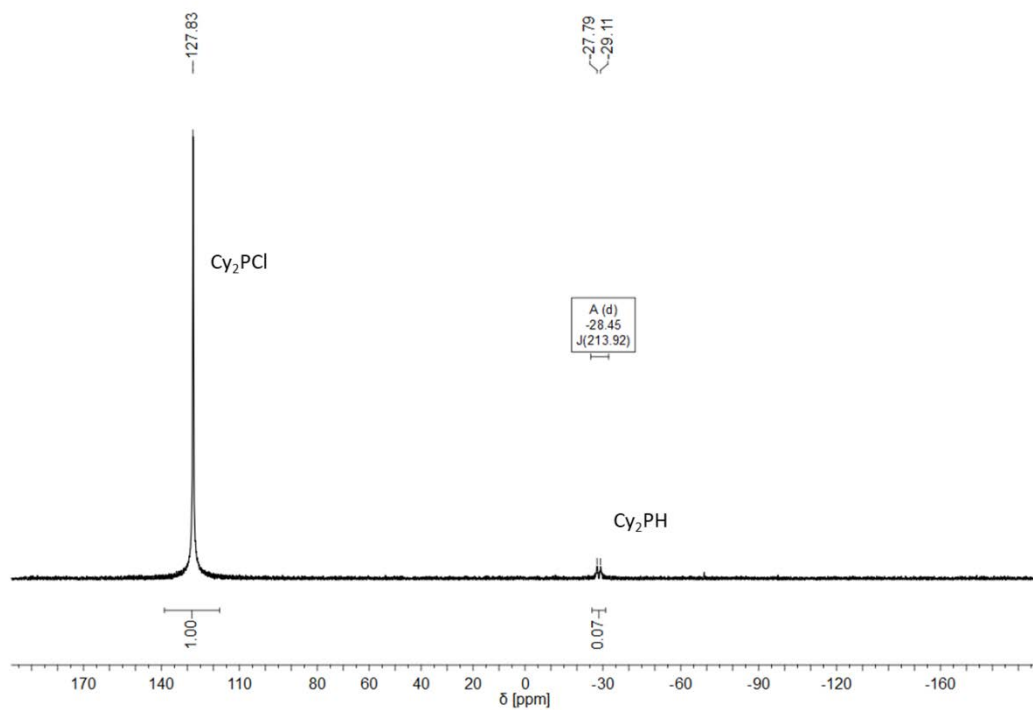

Figure S 60:  $^{31}P$  NMR spectrum of  $[Et_4N]Cl$  catalyzed reaction of  $Cy_2PCl$  with  $PhSiH_3$  ( $60^\circ C$ ,  $oDFB/MeCN$ , after 13 hours).

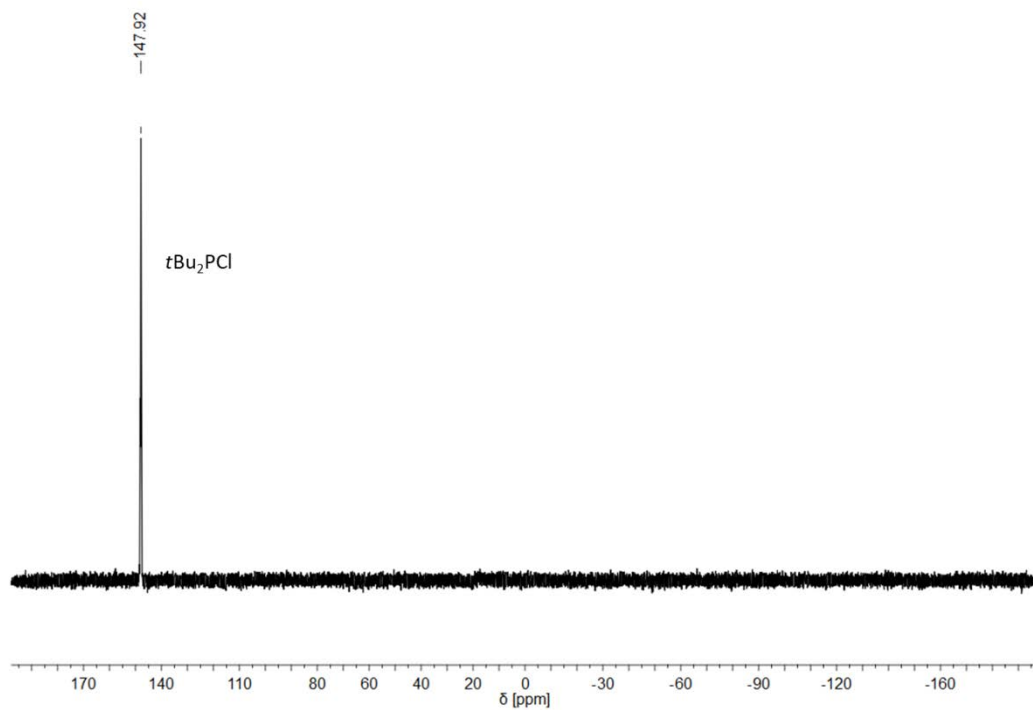

Figure S 61:  $^{31}P$  NMR spectrum of  $[Et_4N]Cl$  catalyzed reaction of  $tBu_2PCl$  with  $PhSiH_3$  ( $80^\circ C$ ,  $oDFB/MeCN$ , after 15 hours).

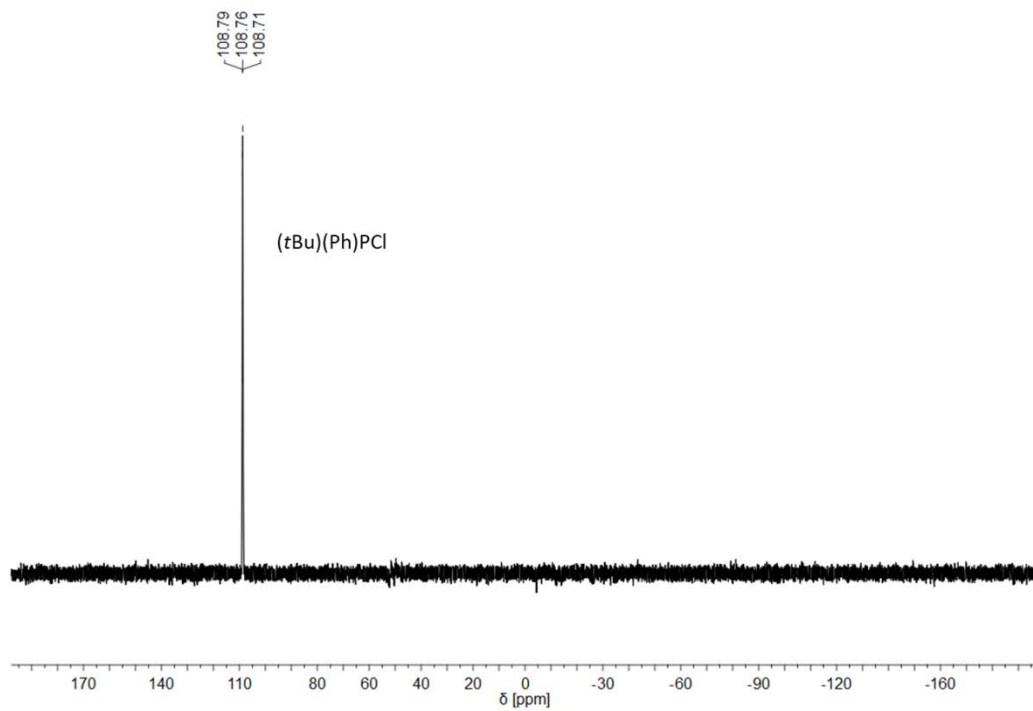

Figure S 62:  $^{31}\text{P}$  NMR spectrum of  $[\text{Et}_4\text{N}]\text{Cl}$  catalyzed reaction of  $(\text{Ph})(\text{tBu})\text{P}(\text{Ph})\text{Cl}$  with  $\text{PhSiH}_3$  ( $80^\circ\text{C}$ ,  $o\text{DFB}/\text{MeCN}$ , after 15 hours).

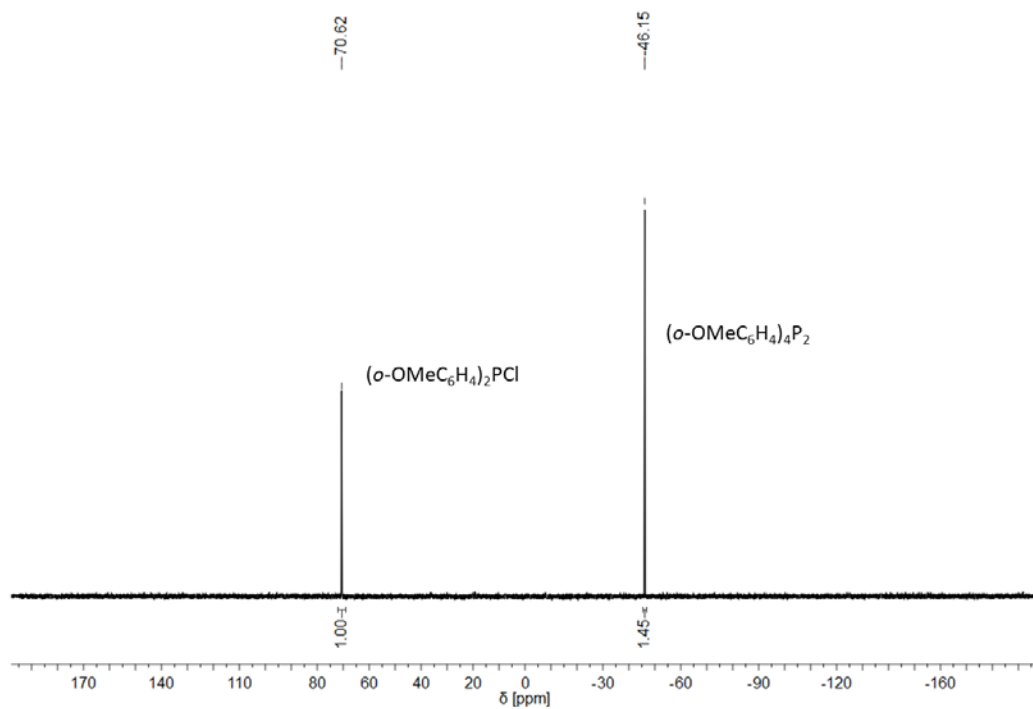

Figure S 63:  $^{31}\text{P}$  NMR spectrum of  $[\text{Et}_4\text{N}]\text{Cl}$  catalyzed reaction of  $(o\text{-OMeC}_6\text{H}_4)_2\text{P}(\text{Ph})\text{Cl}$  with  $\text{PhSiH}_3$  ( $60^\circ\text{C}$ ,  $o\text{DFB}/\text{MeCN}$ , after 3 hours).

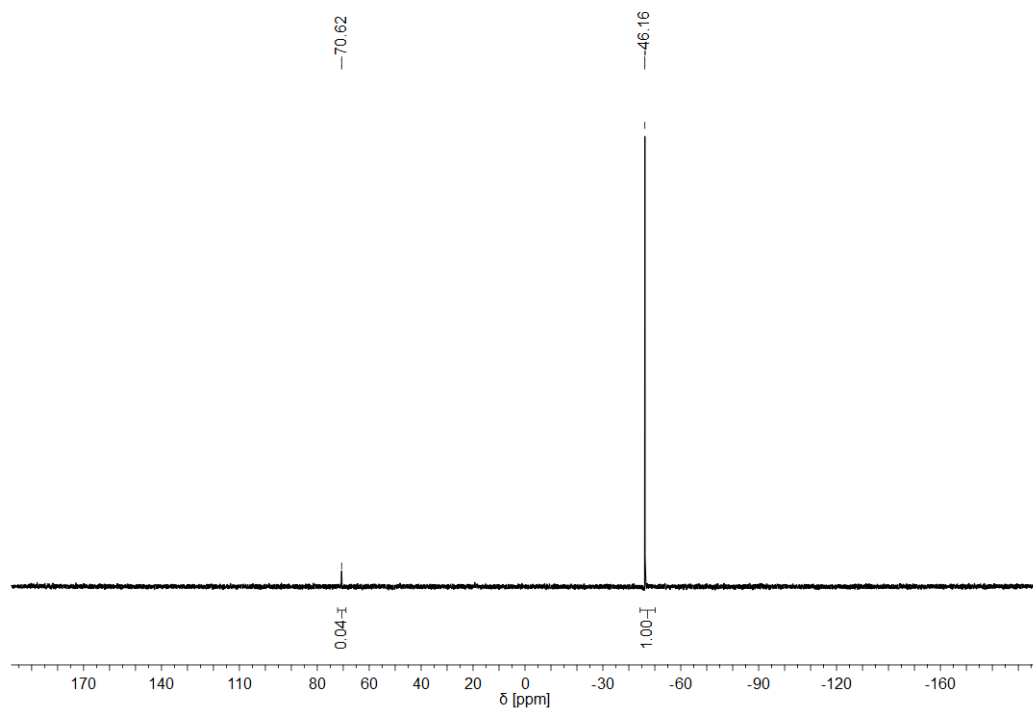

Figure S 64:  $^{31}\text{P}$  NMR spectrum of  $[\text{Et}_4\text{N}]\text{Cl}$  catalyzed reaction of  $(o\text{-OMeC}_6\text{H}_4)_2\text{PCl}$  with  $\text{PhSiH}_3$  ( $60^\circ\text{C}$ ,  $o\text{DFB}/\text{MeCN}$ , after 15 hours).

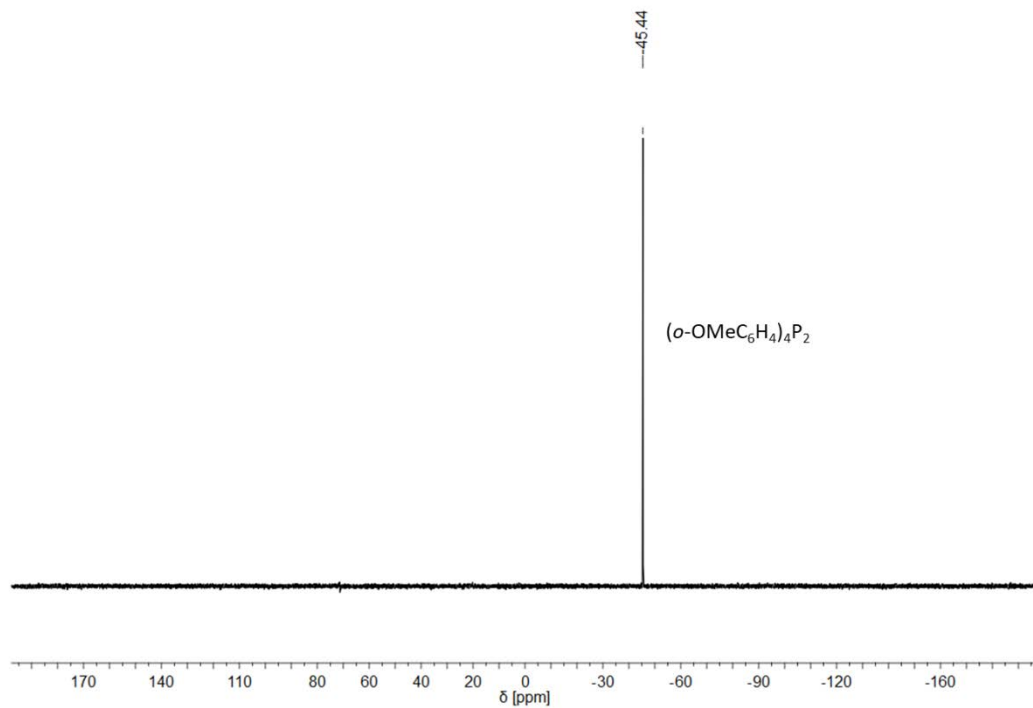

Figure S 65:  $^{31}\text{P}$  NMR spectrum of  $[\text{Et}_4\text{N}]\text{Cl}$  catalyzed reaction of  $(o\text{-OMeC}_6\text{H}_4)_2\text{PCl}$  with  $\text{PhSiH}_3$  ( $60^\circ\text{C}$ ,  $o\text{DFB}/\text{MeCN}$ , after 19 hours).

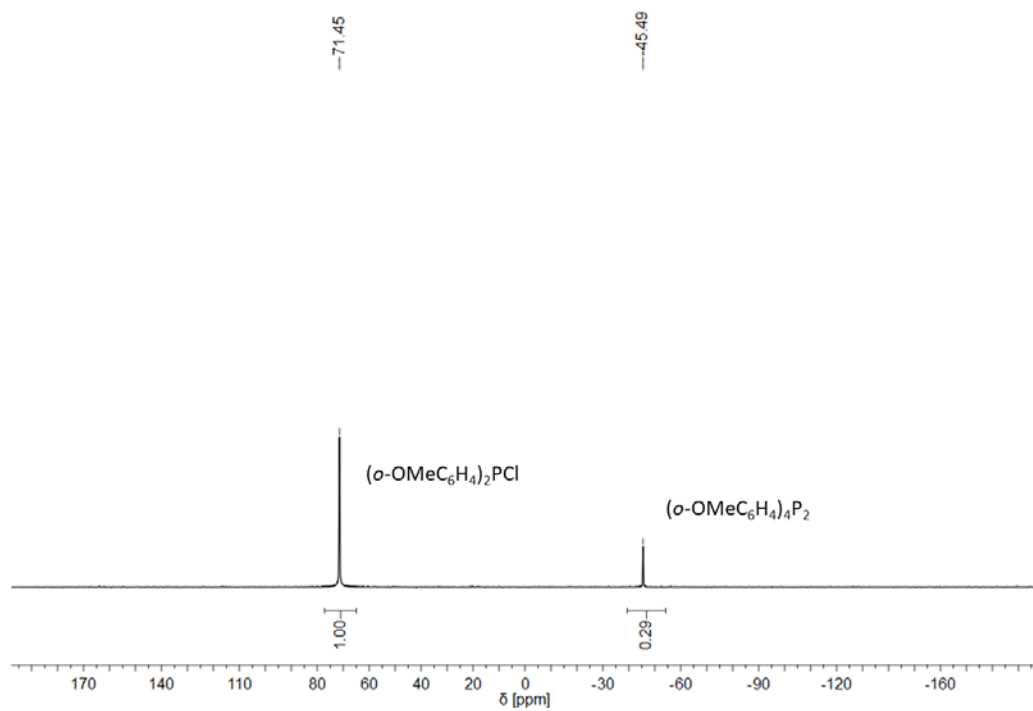

Figure S 66:  $^{31}\text{P}$  NMR spectrum of  $[\text{Et}_4\text{N}]\text{Cl}$  catalyzed reaction of  $(o\text{-OMeC}_6\text{H}_4)_2\text{PCl}$  with  $\text{PhSiH}_3$  ( $30^\circ\text{C}$ ,  $o\text{DFB}/\text{MeCN}$ , after 2 hours).

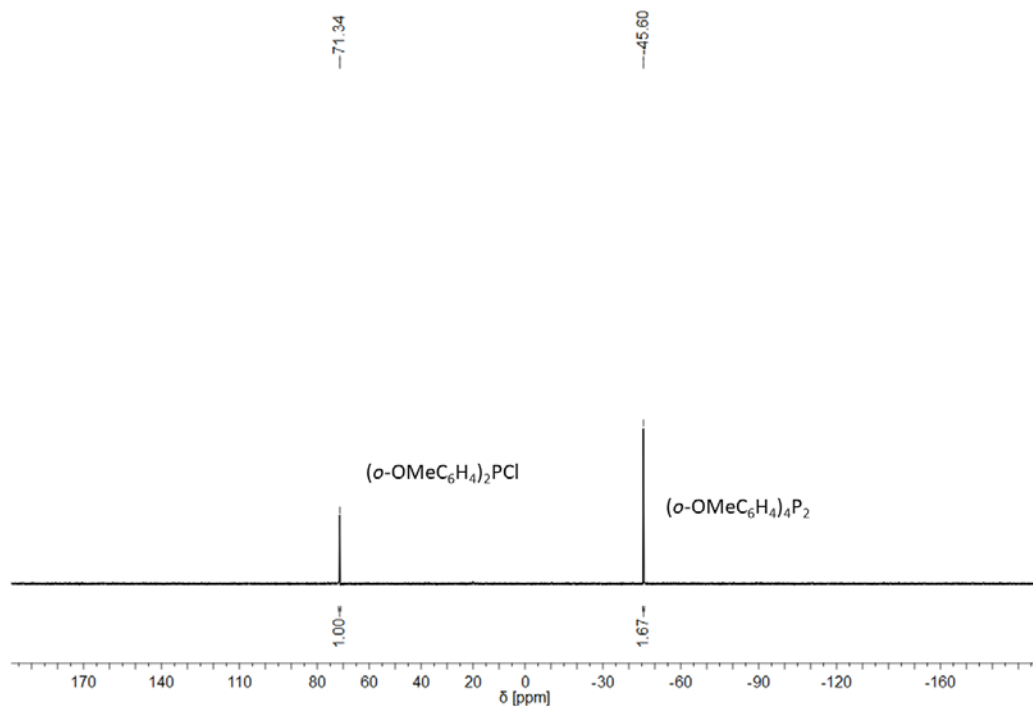

Figure S 67:  $^{31}\text{P}$  NMR spectrum of  $[\text{Et}_4\text{N}]\text{Cl}$  catalyzed reaction of  $(o\text{-OMeC}_6\text{H}_4)_2\text{PCl}$  with  $\text{PhSiH}_3$  ( $30^\circ\text{C}$ ,  $o\text{DFB}/\text{MeCN}$ , after 21 hours).

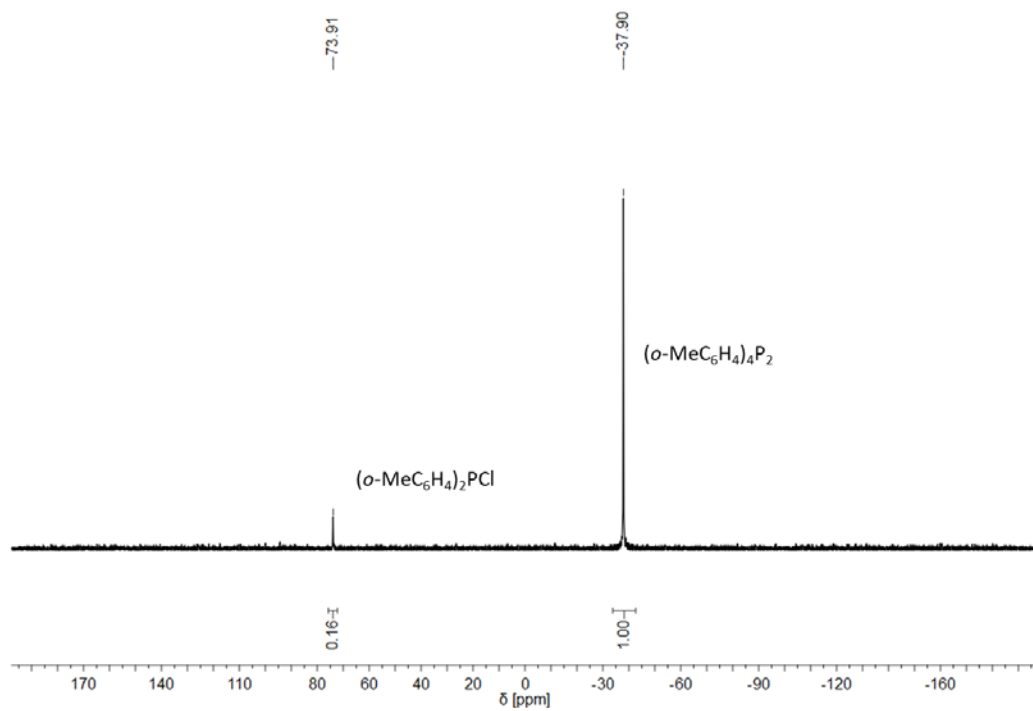

Figure S 68:  $^{31}\text{P}$  NMR spectrum of  $[\text{Et}_4\text{N}]\text{Cl}$  catalyzed reaction of  $(o\text{-MeC}_6\text{H}_4)_2\text{PCl}$  with  $\text{PhSiH}_3$  ( $30^\circ\text{C}$ ,  $o\text{DFB}/\text{MeCN}$ , after 23 hours).

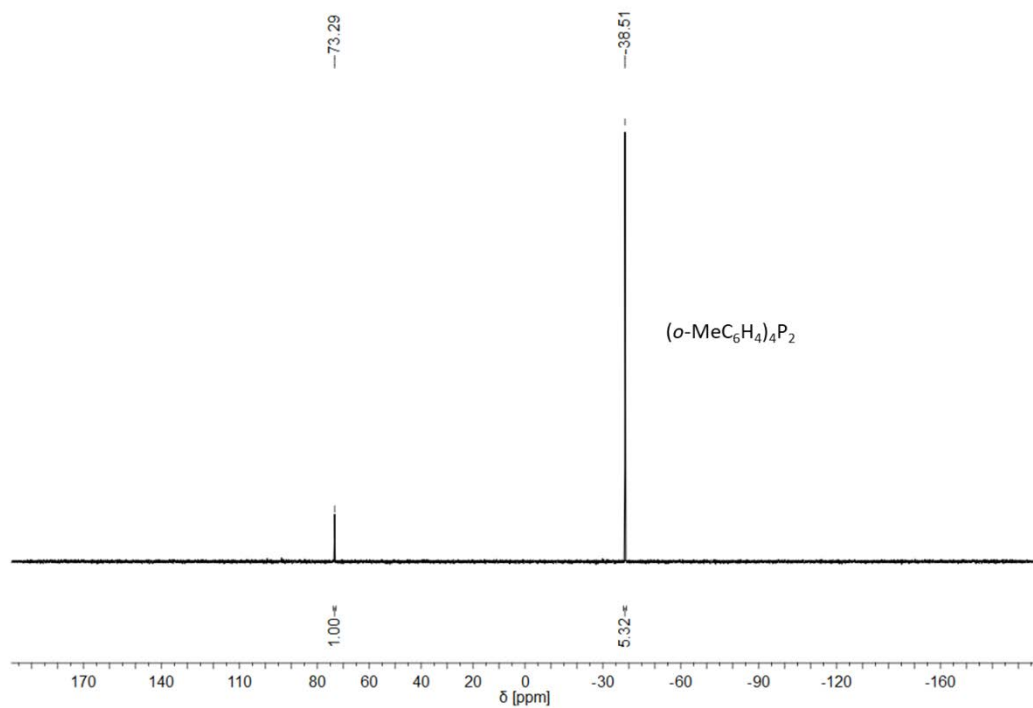

Figure S 69:  $^{31}\text{P}$  NMR spectrum of  $[\text{Et}_4\text{N}]\text{Cl}$  catalyzed reaction of  $(o\text{-MeC}_6\text{H}_4)_2\text{PCl}$  with  $\text{PhSiH}_3$  ( $60^\circ\text{C}$ ,  $o\text{DFB}/\text{MeCN}$ , after 3 hours).



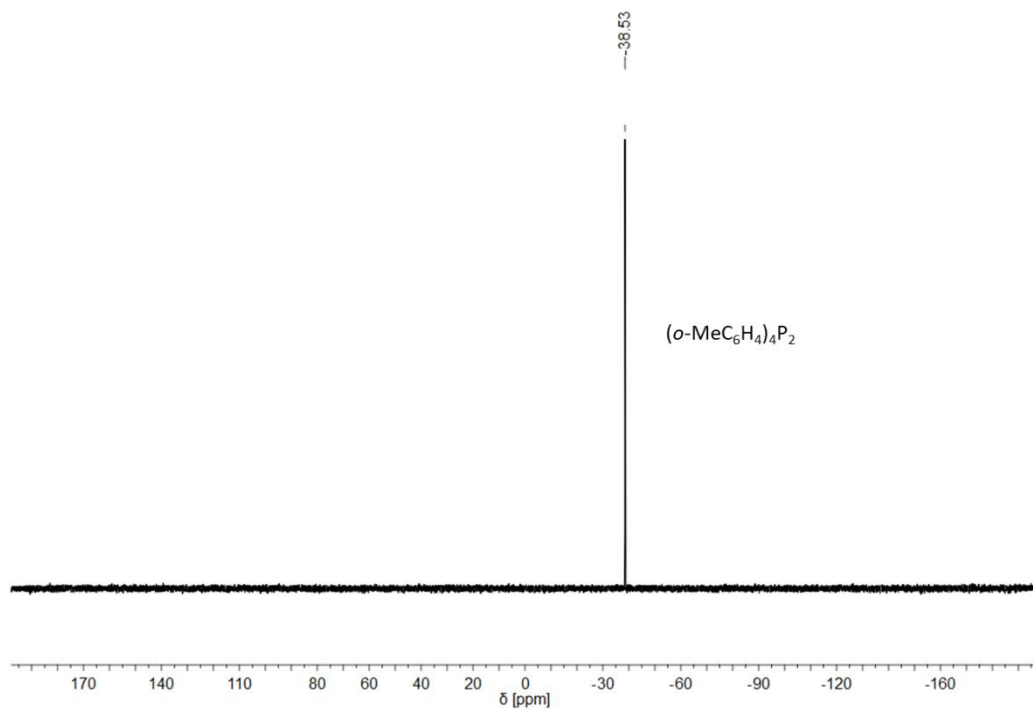

Figure S 70:  $^{31}\text{P}$  NMR spectrum of  $[\text{Et}_4\text{N}]\text{Cl}$  catalyzed reaction of  $(o\text{-MeC}_6\text{H}_4)_2\text{PCl}$  with  $\text{PhSiH}_3$  ( $60^\circ\text{C}$ ,  $o\text{DFB}/\text{MeCN}$ , after 15 hours).

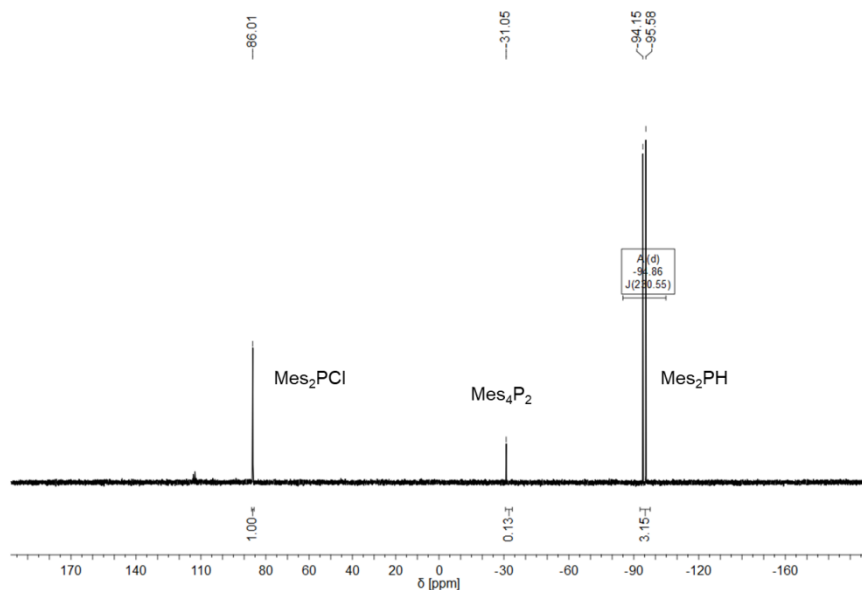

Figure S 71:  $^{31}\text{P}$  NMR spectrum of  $[\text{Et}_4\text{N}]\text{Cl}$  catalyzed reaction of  $(\text{Mes})_2\text{PCl}$  with  $\text{PhSiH}_3$  ( $60^\circ\text{C}$ ,  $o\text{DFB}/\text{MeCN}$ , after 15 hours).

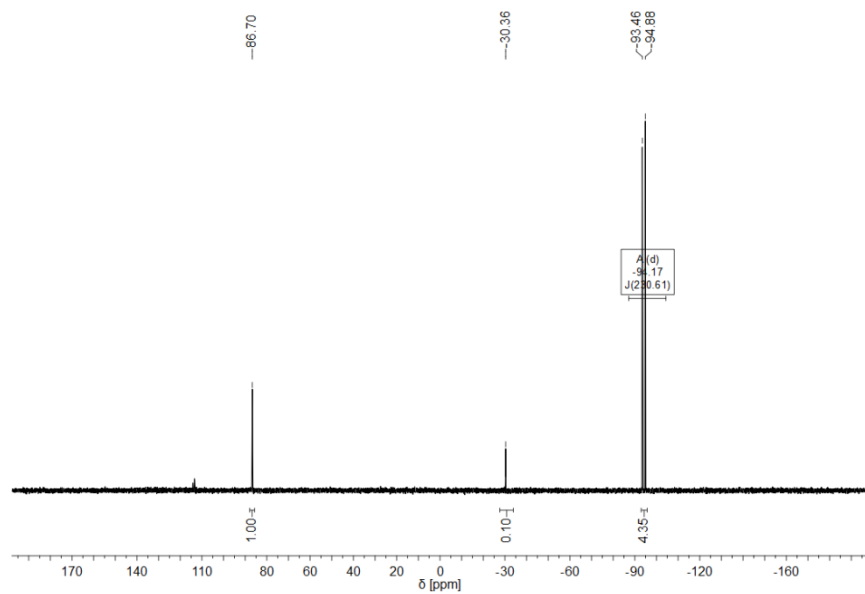

Figure S 72:  $^{31}\text{P}$  NMR spectrum of  $[\text{Et}_4\text{N}]\text{Cl}$  catalyzed reaction of  $(\text{Mes})_2\text{PCl}$  with  $\text{PhSiH}_3$  ( $60^\circ\text{C}$ ,  $o\text{DFB}/\text{MeCN}$ , after 18 hours).

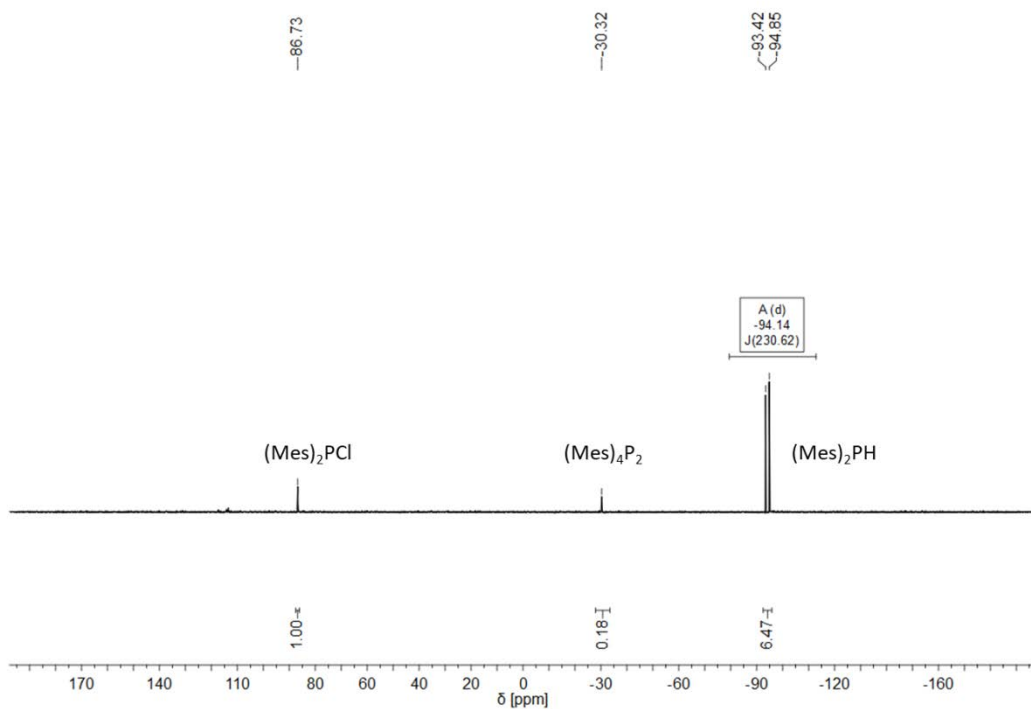

Figure S 73:  $^{31}\text{P}$  NMR spectrum of  $[\text{Et}_4\text{N}]\text{Cl}$  catalyzed reaction of  $(\text{Mes})_2\text{PCl}$  with  $\text{PhSiH}_3$  ( $60^\circ\text{C}$ ,  $o\text{DFB}/\text{MeCN}$ , after 23 hours).

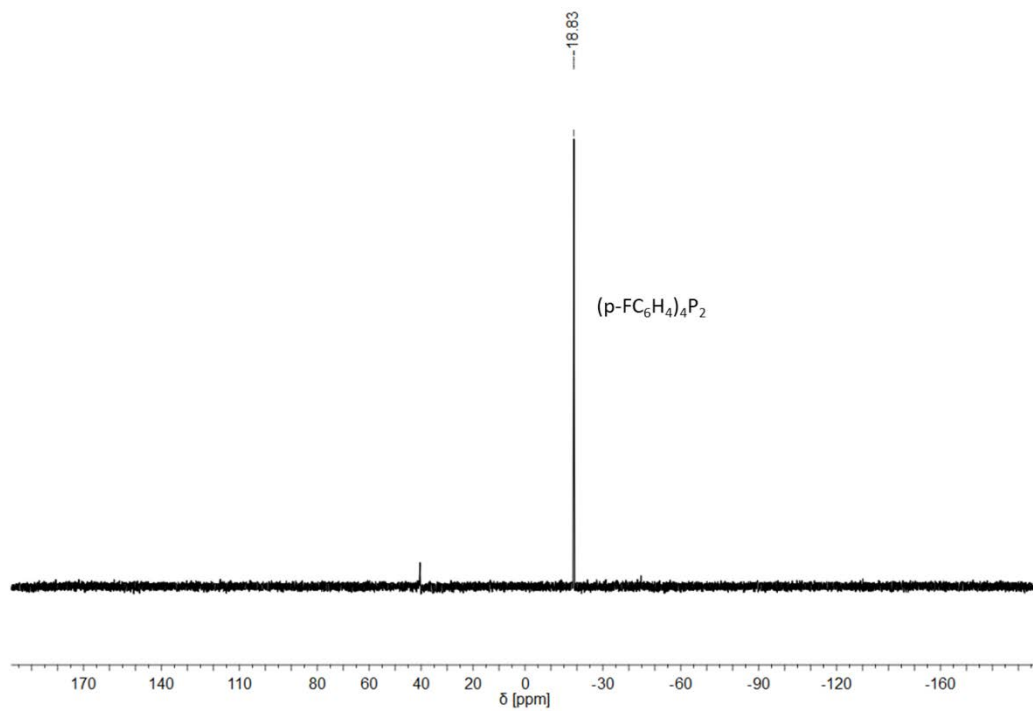

Figure S 74:  $^{31}\text{P}$  NMR spectrum of  $[\text{Et}_4\text{N}]\text{Cl}$  catalyzed reaction of  $(p\text{-FC}_6\text{H}_4)_2\text{PCl}$  with  $\text{PhSiH}_3$  ( $30^\circ\text{C}$ ,  $o\text{DFB}/\text{MeCN}$ , after 2 hours).

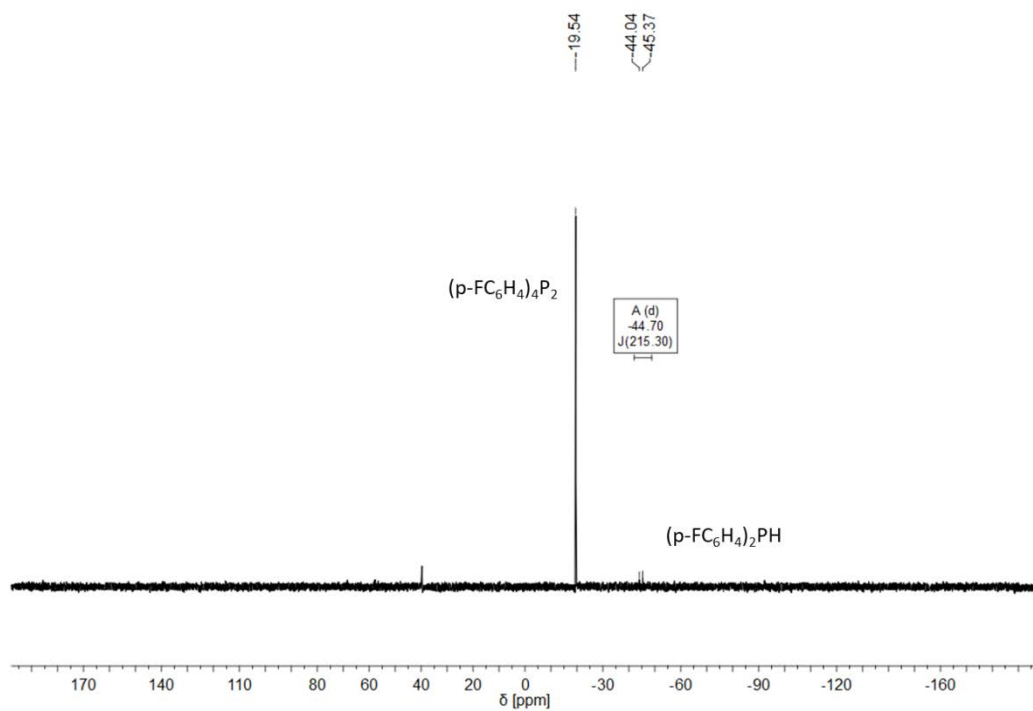

Figure S 75:  $^{31}\text{P}$  NMR spectrum of  $[\text{Et}_4\text{N}]\text{Cl}$  catalyzed reaction of  $(p\text{-FC}_6\text{H}_4)_2\text{PCl}$  with  $\text{PhSiH}_3$  ( $60^\circ\text{C}$ ,  $o\text{DFB}/\text{MeCN}$ , after 3 hours).

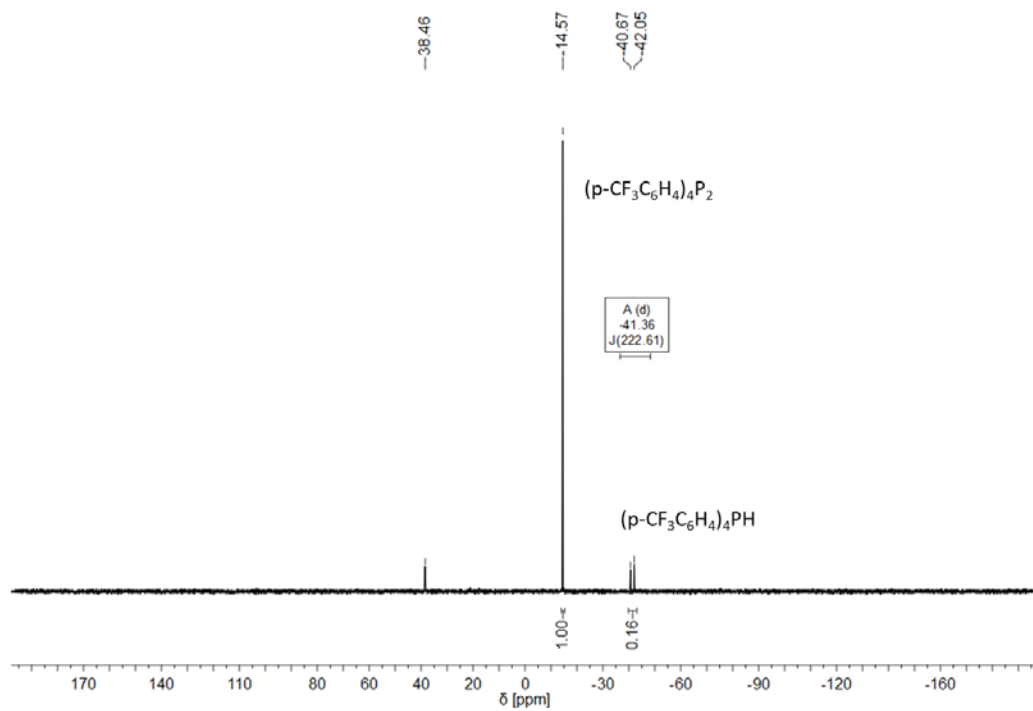

Figure S 76:  $^{31}\text{P}$  NMR spectrum of  $[\text{Et}_4\text{N}]\text{Cl}$  catalyzed reaction of  $(p\text{-CF}_3\text{C}_6\text{H}_4)_2\text{PCl}$  with  $\text{PhSiH}_3$  ( $30^\circ\text{C}$ ,  $o\text{DFB}/\text{MeCN}$ , after 2 hours).

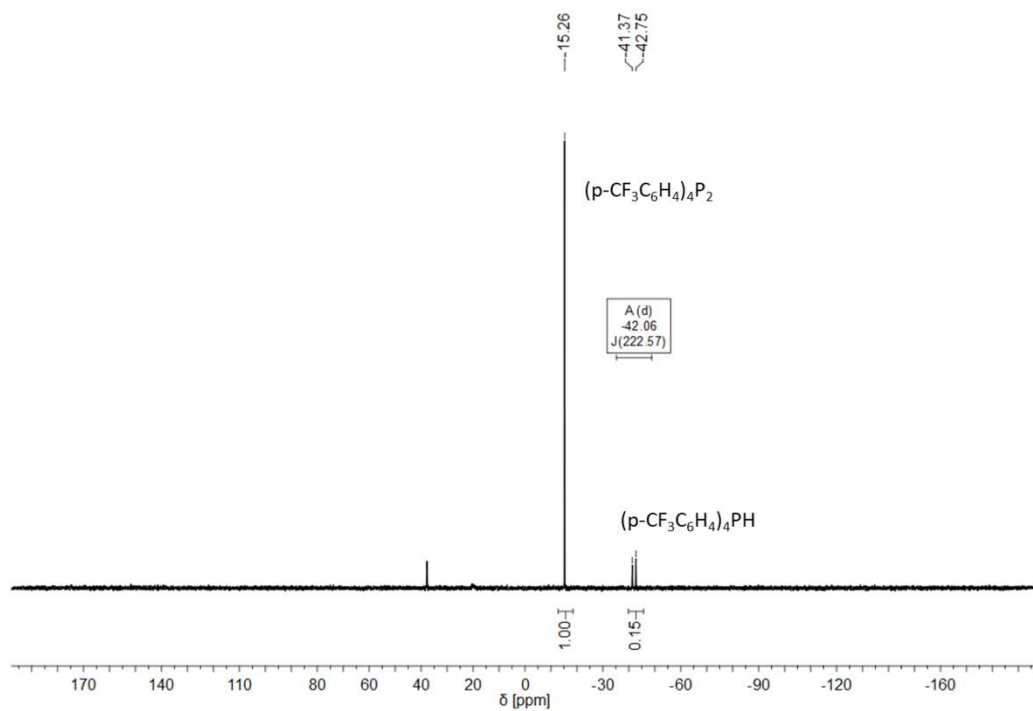

Figure S 77:  $^{31}\text{P}$  NMR spectrum of  $[\text{Et}_4\text{N}]\text{Cl}$  catalyzed reaction of  $(p\text{-CF}_3\text{C}_6\text{H}_4)_2\text{PCl}$  with  $\text{PhSiH}_3$  ( $60^\circ\text{C}$ ,  $o\text{DFB}/\text{MeCN}$ , after 3 hours).

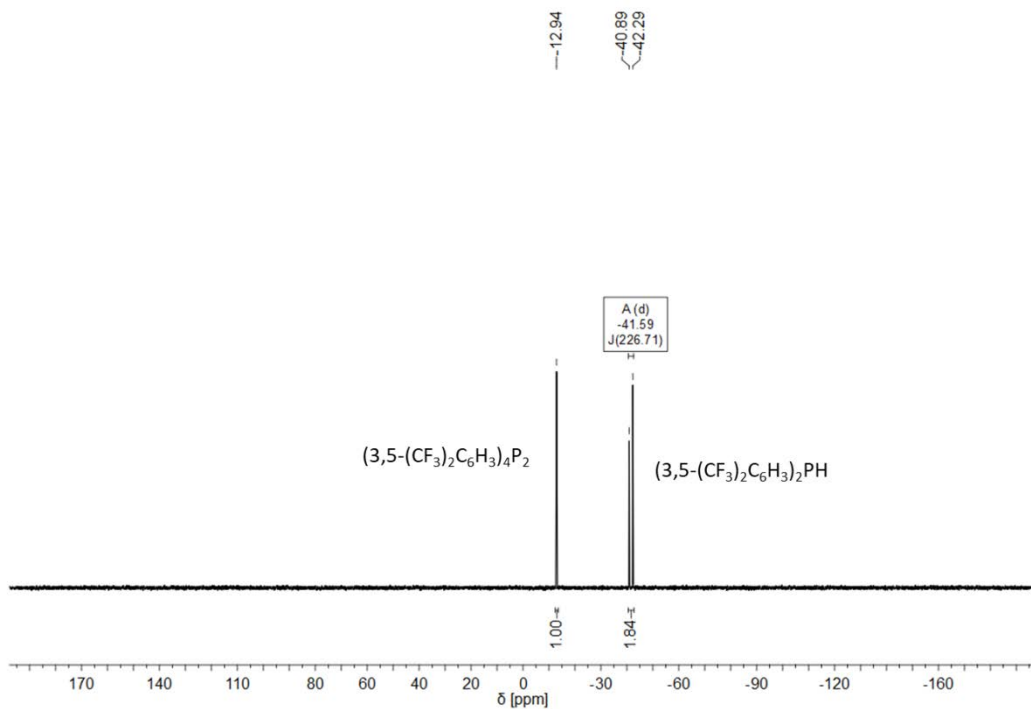

Figure S 78:  $^{31}\text{P}$  NMR spectrum of  $[\text{Et}_4\text{N}]\text{Cl}$  catalyzed reaction of  $(3,5\text{-(CF}_3)_2\text{C}_6\text{H}_3)_2\text{PCl}$  with  $\text{PhSiH}_3$  ( $30^\circ\text{C}$ ,  $o\text{DFB}/\text{MeCN}$ , after 2 hours).

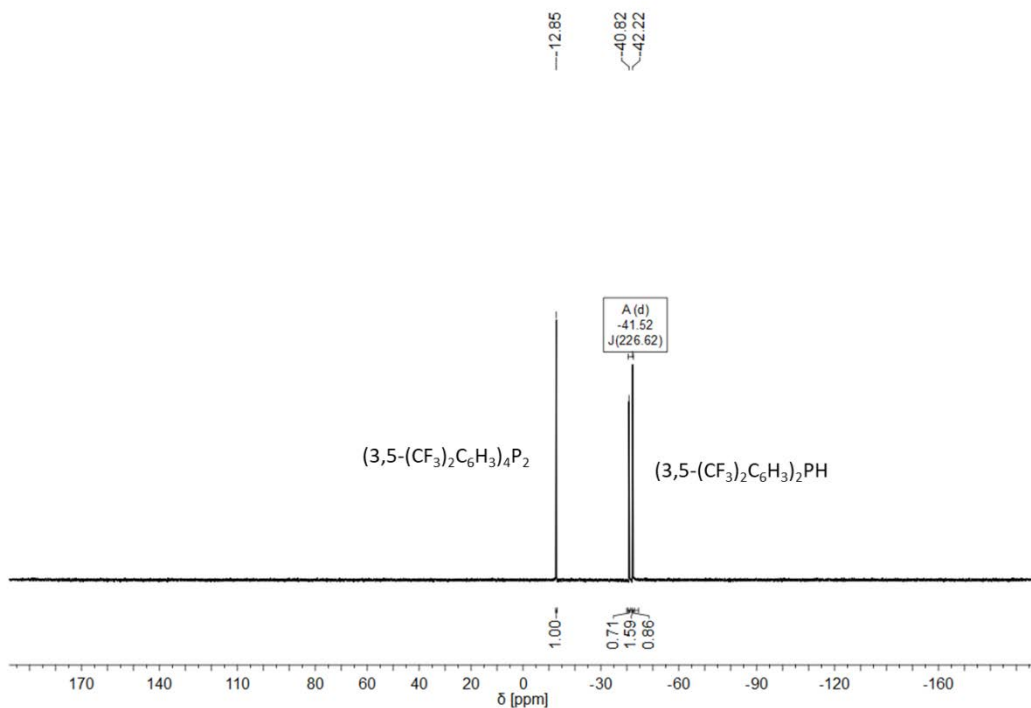

Figure S 79:  $^{31}\text{P}$  NMR spectrum of  $[\text{Et}_4\text{N}]\text{Cl}$  catalyzed reaction of  $(3,5\text{-(CF}_3)_2\text{C}_6\text{H}_3)_2\text{PCl}$  with  $\text{PhSiH}_3$  ( $60^\circ\text{C}$ ,  $o\text{DFB}/\text{MeCN}$ , after 2 hours).

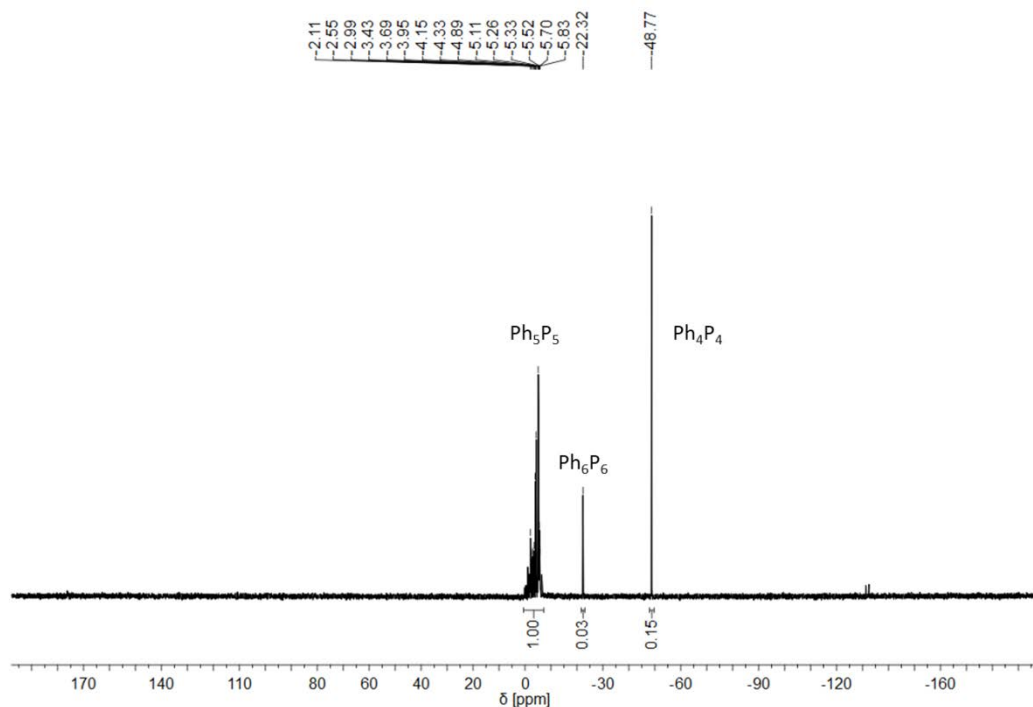

Figure S 80:  $^{31}\text{P}$  NMR spectrum of  $[\text{Et}_4\text{N}]\text{Cl}$  catalyzed reaction of  $\text{Ph}_2\text{PCl}_2$  with  $\text{PhSiH}_3$  ( $30^\circ\text{C}$ ,  $o\text{DFB}/\text{MeCN}$ , after 2 hours).

### 2.3 Two-component catalysis with 9-BBN and $[\text{Et}_4\text{N}]\text{Cl}$

**General procedure:**  $\text{R}_2\text{PCl}$  (0.09 mmol, 1 equiv), silane (1 equiv),  $[\text{Et}_4\text{N}]\text{Cl}$  (0.7 mg, 0.0045 mmol, 0.05 equiv) and 9-BBN (0.5 mg, 0.0045 mmol, 0.05 equiv) were dissolved in a mixture of  $o\text{DFB}/\text{MeCN}$  (0.6 ml, 2/1; V/V) and heated to the indicated temperature. The reaction progress was monitored by  $^{31}\text{P}$  NMR spectroscopy.

Table S 7: Synthesis of  $\text{R}_4\text{P}_2$  and  $\text{R}_2\text{PH}$  from  $\text{R}_2\text{PCl}$  with  $[\text{Et}_4\text{N}]\text{Cl}$  /9-BBN and  $\text{PhSiH}_3$ .

| $\text{R}_2\text{PCl}$                                        | T<br>[ $^\circ\text{C}$ ] | t [h] | conv.<br>[%] | product             |
|---------------------------------------------------------------|---------------------------|-------|--------------|---------------------|
| $\text{Ph}_2\text{PCl}$                                       | 30                        | 2     | >99          | PP (89 %) PH (11 %) |
| $i\text{Pr}_2\text{PCl}$                                      | 30                        | 2     | 0            | -                   |
|                                                               | 60                        | 2     | >99          | PP (2 %) PH (98 %)  |
| $t\text{Bu}_2\text{PCl}$                                      | 80                        | 5 d   | 97           | PH (>99 %)          |
| $t\text{BuPhPCl}$                                             | 30                        | 72    | 98           | PP (89 %) PH (11 %) |
| $t\text{BuPhPCl}$                                             | 60                        | 8     | >99          | PP (78 %) PH (22 %) |
| $(o\text{-OMeC}_6\text{H}_4)_2\text{PCl}$                     | 30                        | 2     | >99          | PP (>99) PH (-)     |
| $(o\text{-MeC}_6\text{H}_4)_2\text{PCl}$                      | 30                        | 2     | >99          | PP (89 %) PH (11 %) |
| (2,4,6-<br>$\text{Me}_3\text{C}_6\text{H}_2$ ) $_2\text{PCl}$ | 30                        | 2     | >99          | PP (<1%) PH (>99%)  |
| $(p\text{-FC}_6\text{H}_4)_2\text{PCl}$                       | 30                        | 2     | >99          | PP (85 %) PH (15 %) |
| $(p\text{-CF}_3\text{C}_6\text{H}_4)_2\text{PCl}$             | 30                        | 2     | 99           | PP (66 %) PH (33 %) |

|                                                                                        |    |   |     |                                                                                                                                                                                                                                                                                                                                                                                                                     |
|----------------------------------------------------------------------------------------|----|---|-----|---------------------------------------------------------------------------------------------------------------------------------------------------------------------------------------------------------------------------------------------------------------------------------------------------------------------------------------------------------------------------------------------------------------------|
| (3,5-(CF <sub>3</sub> ) <sub>2</sub> C <sub>6</sub> H <sub>3</sub> ) <sub>2</sub> PCl  | 30 | 2 | >99 | PP (17 %) PH (83 %)                                                                                                                                                                                                                                                                                                                                                                                                 |
| ( <i>o</i> -NMe <sub>2</sub> C <sub>6</sub> H <sub>4</sub> ) <sub>2</sub> PCl          | 30 | 4 | >99 | PP (98%), PH (2%)                                                                                                                                                                                                                                                                                                                                                                                                   |
| ( <i>p</i> -Cl-C <sub>6</sub> H <sub>4</sub> ) <sub>2</sub> PCl                        | 30 | 2 | >99 | PP (55%) ( $\delta(^{31}\text{P}) = -18.1 \text{ ppm}$ ; lit <sup>20</sup> : $\delta(^{31}\text{P}, \text{CD}_2\text{Cl}_2) = -17.7 \text{ ppm}$ (d, $^1J_{\text{PH}} = 219 \text{ Hz}$ ), PH (45%) ( $\delta(^{31}\text{P}) = -43.4 \text{ ppm}$ (d, $^1J_{\text{PH}} = 214 \text{ Hz}$ ); lit <sup>13</sup> : $\delta(^{31}\text{P}, \text{THF-d8}) = -45.6 \text{ ppm}$ (d, $^1J_{\text{PH}} = 219 \text{ Hz}$ ) |
| ( <i>m</i> -Me-C <sub>6</sub> H <sub>4</sub> ) <sub>2</sub> PCl                        | 30 | 2 | >99 | PP (98%), PH (2%) ( $\delta(^{31}\text{P}) = -39.7 \text{ ppm}$ (d, $^1J_{\text{PH}} = 215 \text{ Hz}$ ); lit <sup>21</sup> : $\delta(^{31}\text{P}, \text{C}_6\text{D}_6) = -40.3 \text{ ppm}$ (d, $^1J_{\text{PH}} = 215 \text{ Hz}$ )                                                                                                                                                                            |
| (2,4,6-(CF <sub>3</sub> ) <sub>2</sub> C <sub>6</sub> H <sub>2</sub> )PCl <sub>2</sub> | 30 | 4 | >99 | (2,4,6-(CF <sub>3</sub> ) <sub>2</sub> C <sub>6</sub> H <sub>2</sub> )PH <sub>2</sub> (99 %) ( $\delta(^{31}\text{P}\{^1\text{H}\}) = -139.4 \text{ ppm}$ (sept, $^4J_{\text{PF}} = 29 \text{ Hz}$ ); lit <sup>5</sup> : $\delta(^{31}\text{P}\{^1\text{H}\}, \text{C}_6\text{D}_6) = -139.1 \text{ ppm}$ (sept q, $^4J_{\text{PF}} = 29$ ; $^6J_{\text{PF}} = 2.3 \text{ Hz}$ )                                    |
| PhPCl <sub>2</sub> <sup>[a]</sup>                                                      | 30 | 2 | >99 | PP (>99) Ph <sub>5</sub> P <sub>5</sub> (64 %) Ph <sub>4</sub> P <sub>4</sub> (35 %) Ph <sub>6</sub> P <sub>6</sub> (1 %)                                                                                                                                                                                                                                                                                           |

Reaction conditions: 5 mol% [Et<sub>4</sub>N]Cl and 9-BBN, 1 equiv PhSiH<sub>3</sub>, 0.15 M (R<sub>2</sub>PCl) in *o*DFB/MeCN (2/1;V/V). [a] 2 equiv of PhSiH<sub>3</sub> were used.

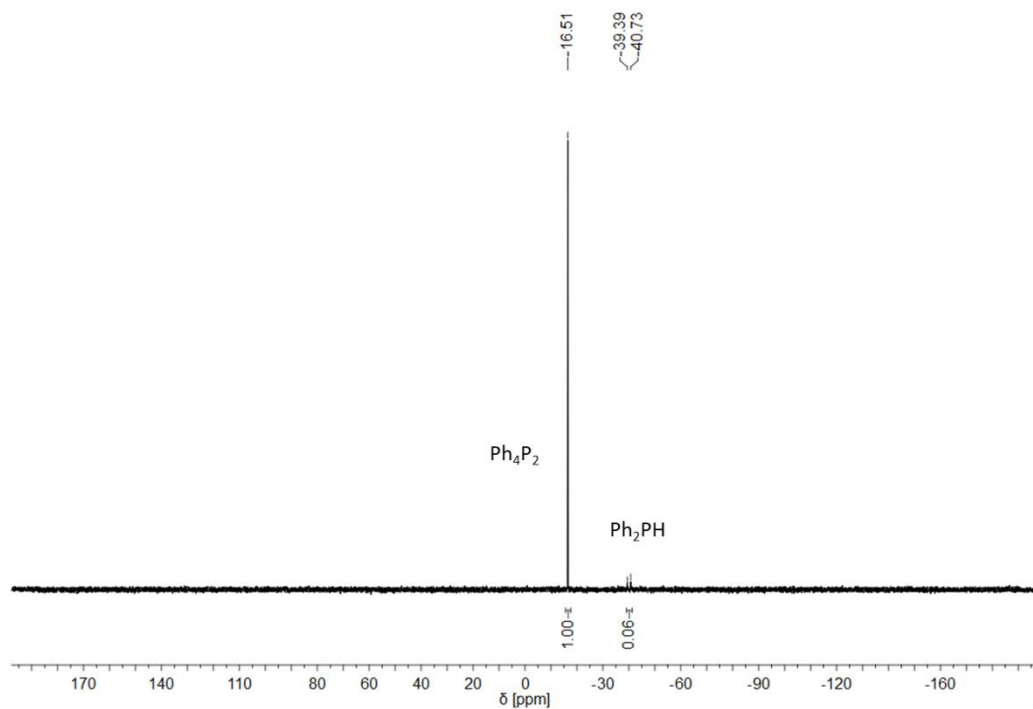

Figure S 81: <sup>31</sup>P NMR spectrum of [Et<sub>4</sub>N]Cl /9-BBN catalyzed reaction of Ph<sub>2</sub>PCl with PhSiH<sub>3</sub> (30°C, *o*DFB/MeCN, after 2 hours).

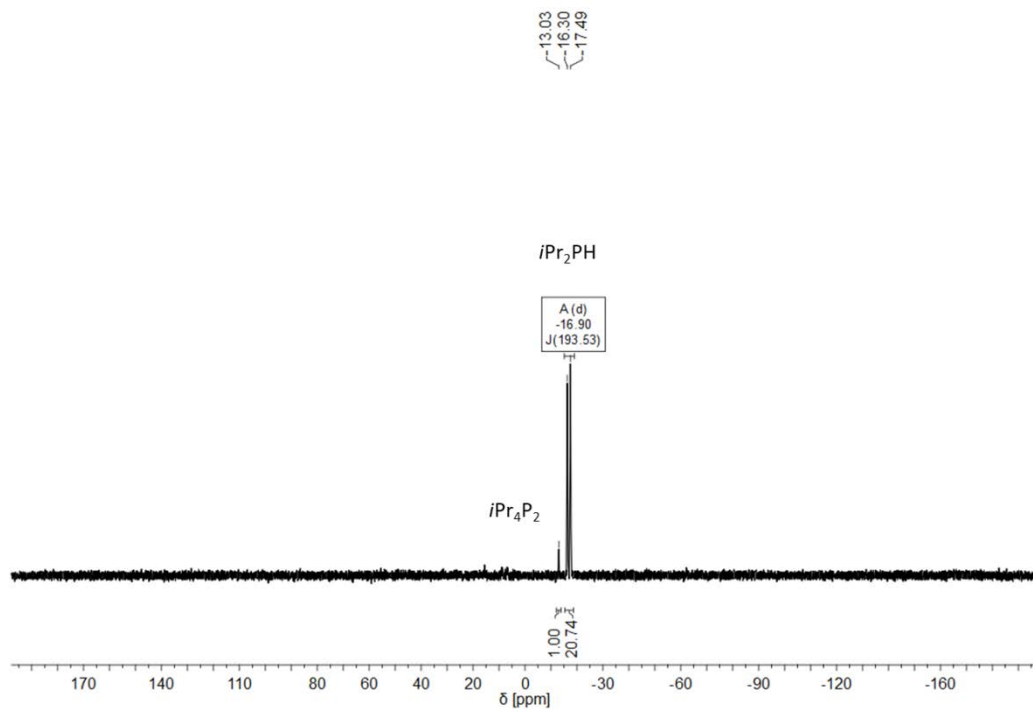

Figure S 82:  $^{31}\text{P}$  NMR spectrum of  $[\text{Et}_4\text{N}]\text{Cl}$  /9-BBN catalyzed reaction of  $i\text{Pr}_2\text{PCL}$  with  $\text{PhSiH}_3$  ( $30^\circ\text{C}$ ,  $o\text{DFB}/\text{MeCN}$ , after 2 hours).

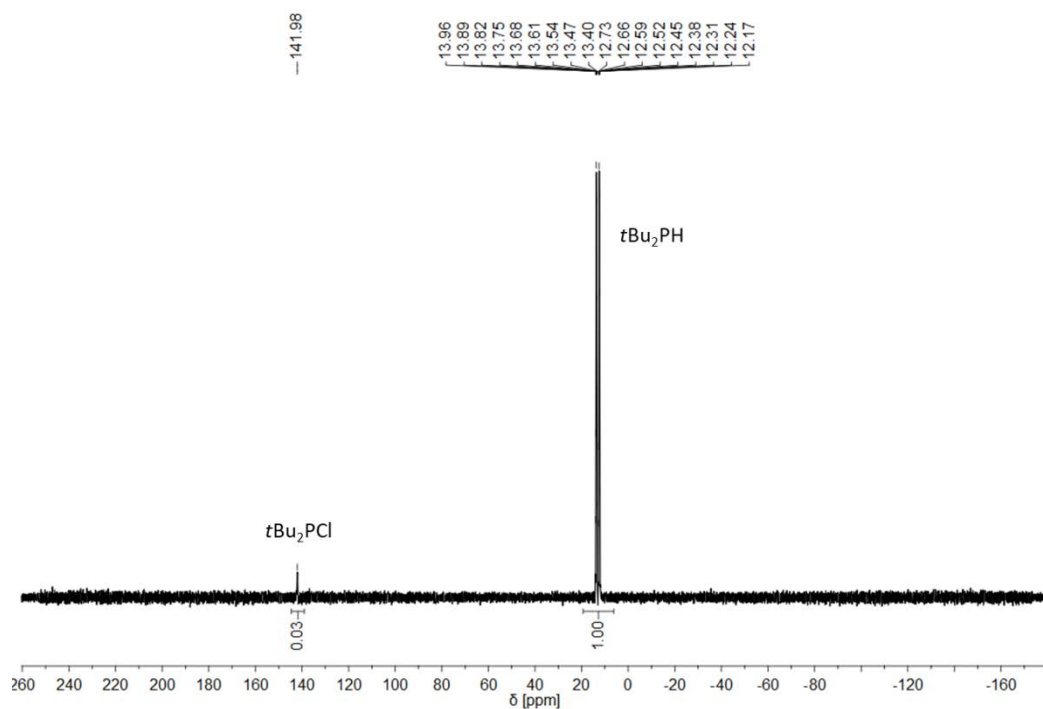

Figure S 83:  $^{31}\text{P}$  NMR spectrum of  $[\text{Et}_4\text{N}]\text{Cl}$  /9-BBN catalyzed reaction of  $t\text{Bu}_2\text{PCL}$  with  $\text{PhSiH}_3$  ( $80^\circ\text{C}$ ,  $o\text{DFB}/\text{MeCN}$ , after 5 days).



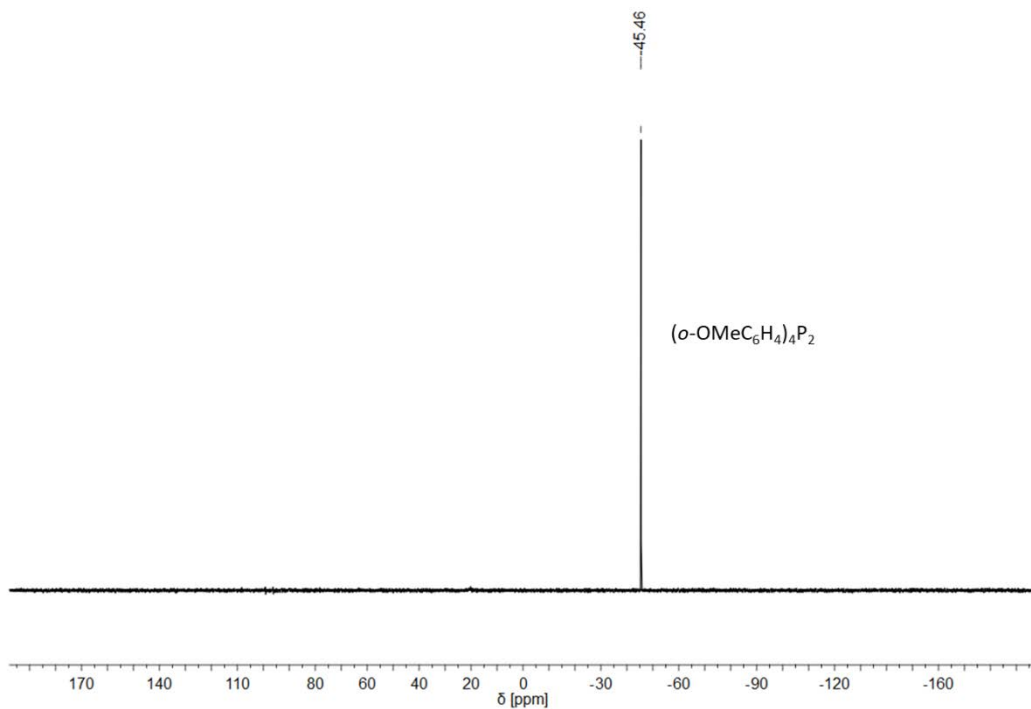

Figure S 84:  $^{31}\text{P}$  NMR spectrum of  $[\text{Et}_4\text{N}]\text{Cl}$  /9-BBN catalyzed reaction of  $(o\text{-OMeC}_6\text{H}_4)_2\text{PCl}$  with  $\text{PhSiH}_3$  ( $30^\circ\text{C}$ ,  $o\text{DFB}/\text{MeCN}$ , after 2 hours).

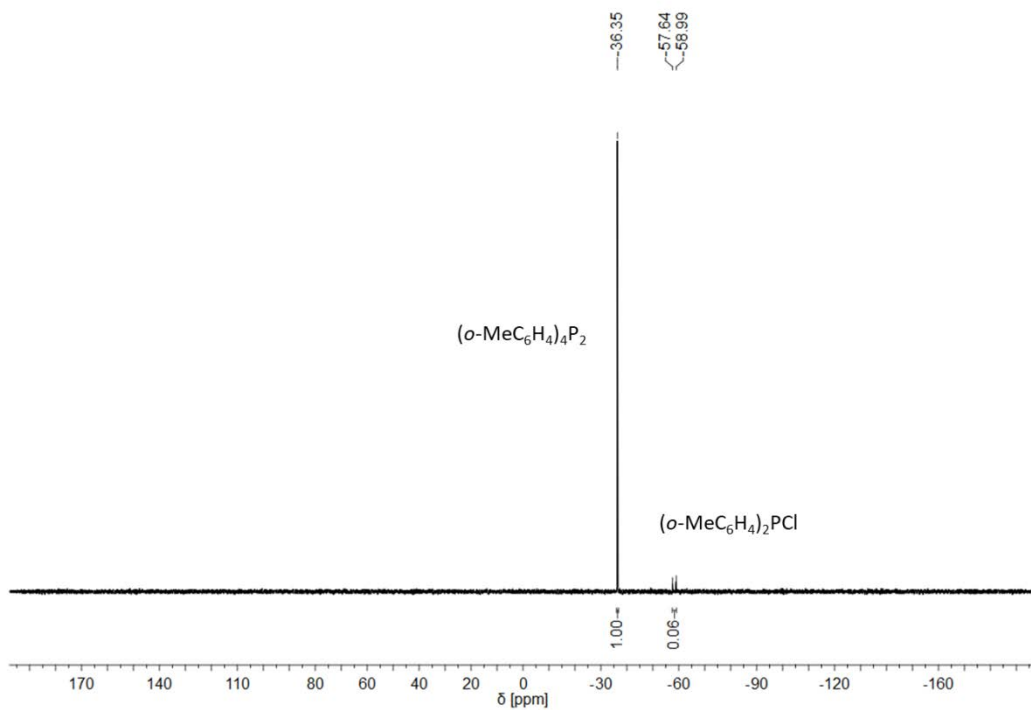

Figure S 85:  $^{31}\text{P}$  NMR spectrum of  $[\text{Et}_4\text{N}]\text{Cl}$  /9-BBN catalyzed reaction of  $(o\text{-MeC}_6\text{H}_4)_2\text{PCl}$  with  $\text{PhSiH}_3$  ( $30^\circ\text{C}$ , reaction run in  $o\text{DFB}/\text{MeCN}$ , NMR measured in  $\text{C}_6\text{D}_6$ , after 2 hours).

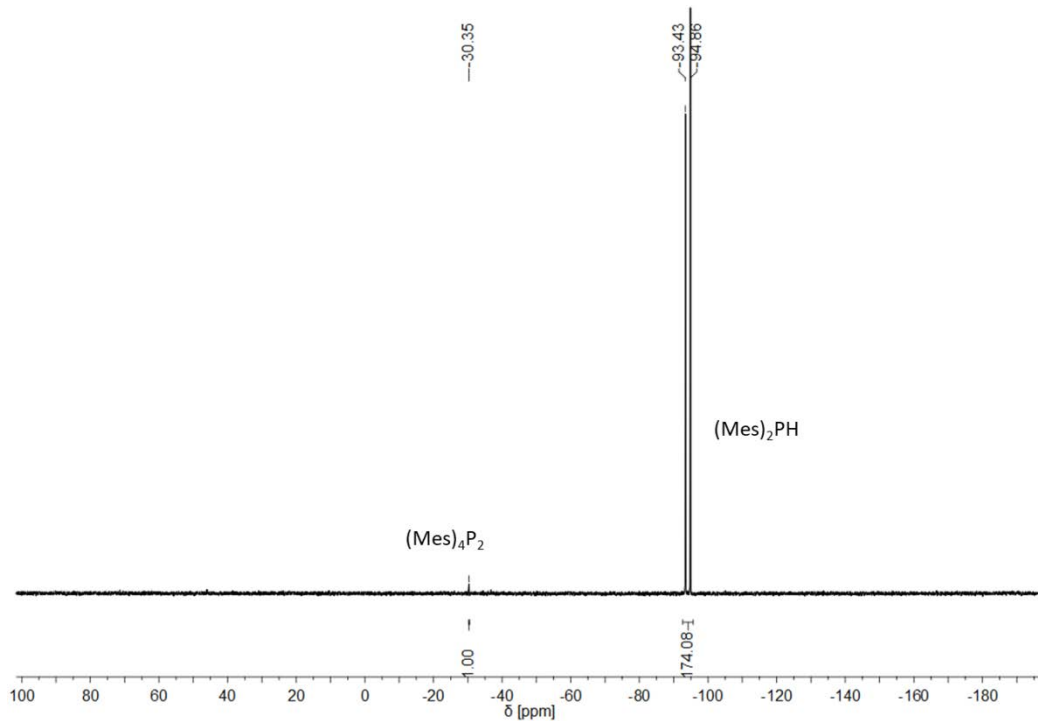

Figure S 86:  $^{31}\text{P}$  NMR spectrum of  $[\text{Et}_4\text{N}]\text{Cl}$  9-BBN catalyzed reaction of  $(\text{Mes})_2\text{PCl}$  with  $\text{PhSiH}_3$  ( $30^\circ\text{C}$ ,  $o\text{DFB}/\text{MeCN}$ , after 2 hours).

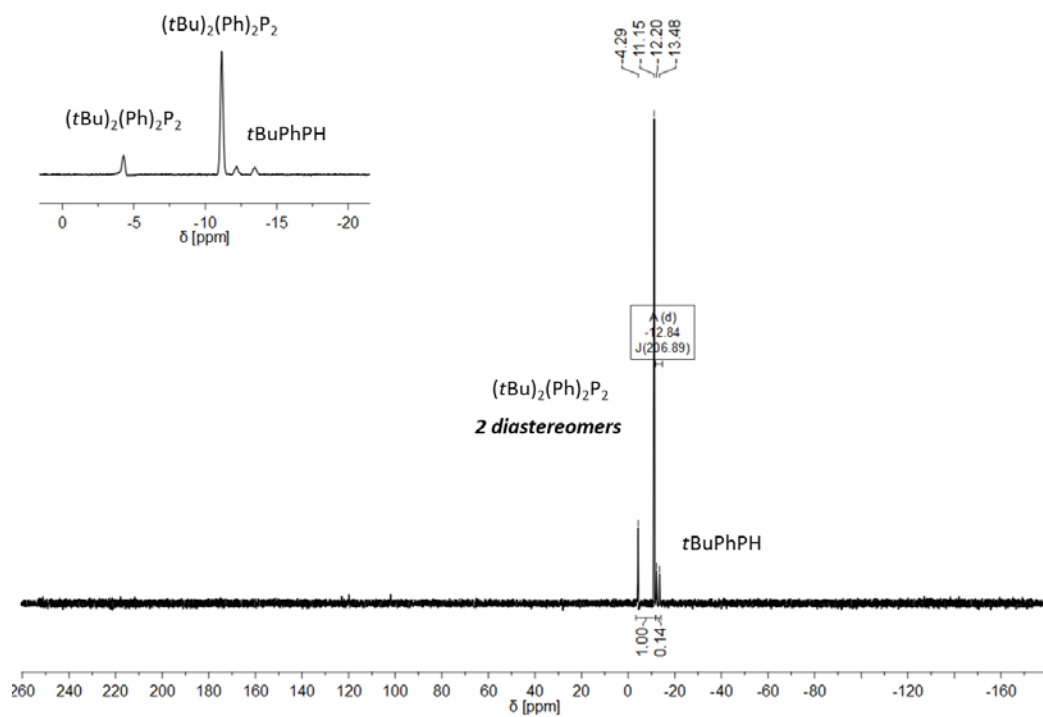

Figure S 87:  $^{31}\text{P}$  NMR spectrum of  $[\text{Et}_4\text{N}]\text{Cl}$  /9-BBN catalyzed reaction of  $(\text{tBu})(\text{Ph})\text{PCl}$  with  $\text{PhSiH}_3$  ( $60^\circ\text{C}$ ,  $o\text{DFB}/\text{MeCN}$ , after 8 hours).

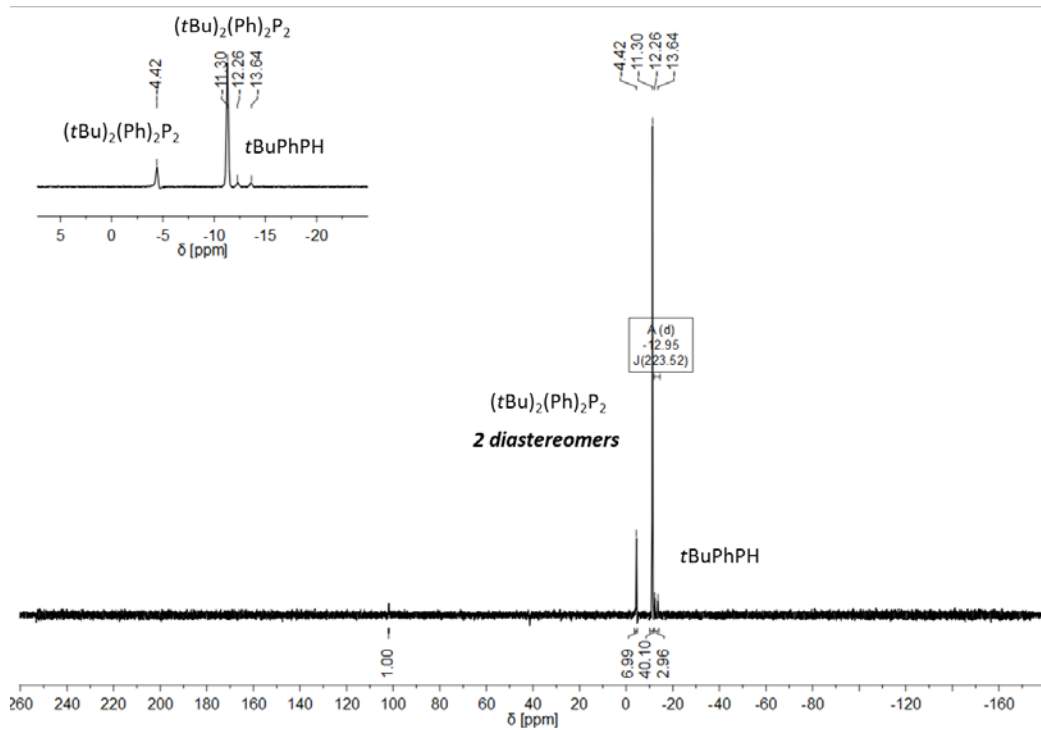

Figure S 88:  $^{31}\text{P}$  NMR spectrum of  $[\text{Et}_4\text{N}]\text{Cl}$  / 9-BBN catalyzed reaction of  $(t\text{Bu})(\text{Ph})\text{PCl}$  with  $\text{PhSiH}_3$  ( $30^\circ\text{C}$ ,  $o\text{DFB}/\text{MeCN}$ , after 72 hours).

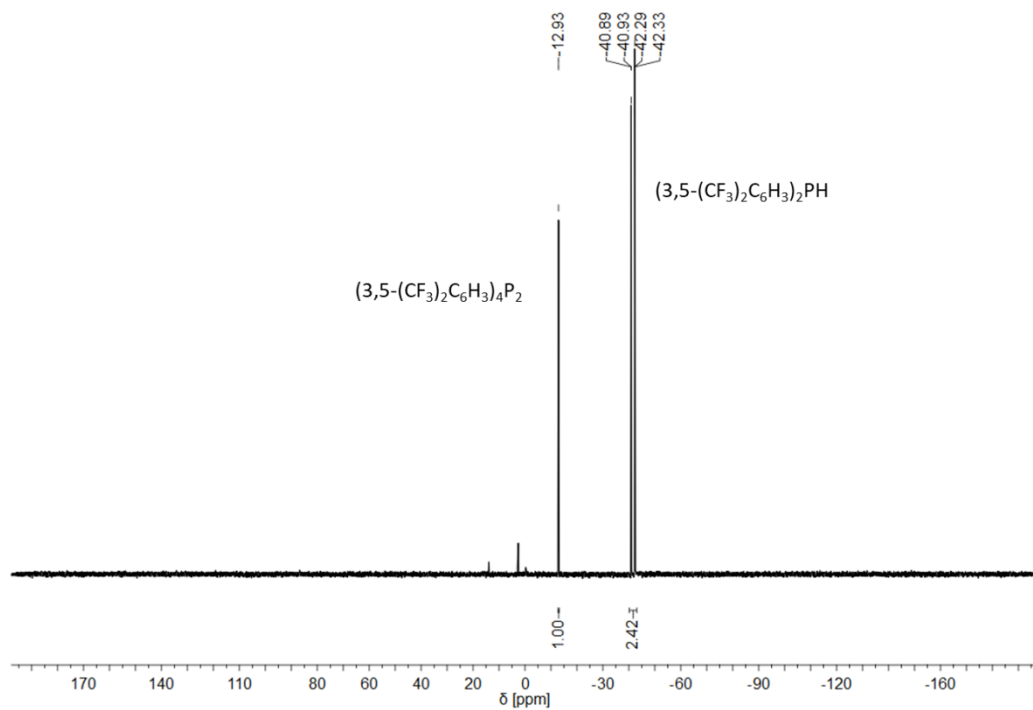

Figure S 89:  $^{31}\text{P}$  NMR spectrum of  $[\text{Et}_4\text{N}]\text{Cl}$  / 9-BBN catalyzed reaction of  $(3,5\text{-(CF}_3)_2\text{C}_6\text{H}_3)_2\text{PCl}$  with  $\text{PhSiH}_3$  ( $30^\circ\text{C}$ ,  $o\text{DFB}/\text{MeCN}$ , after 2 hours).

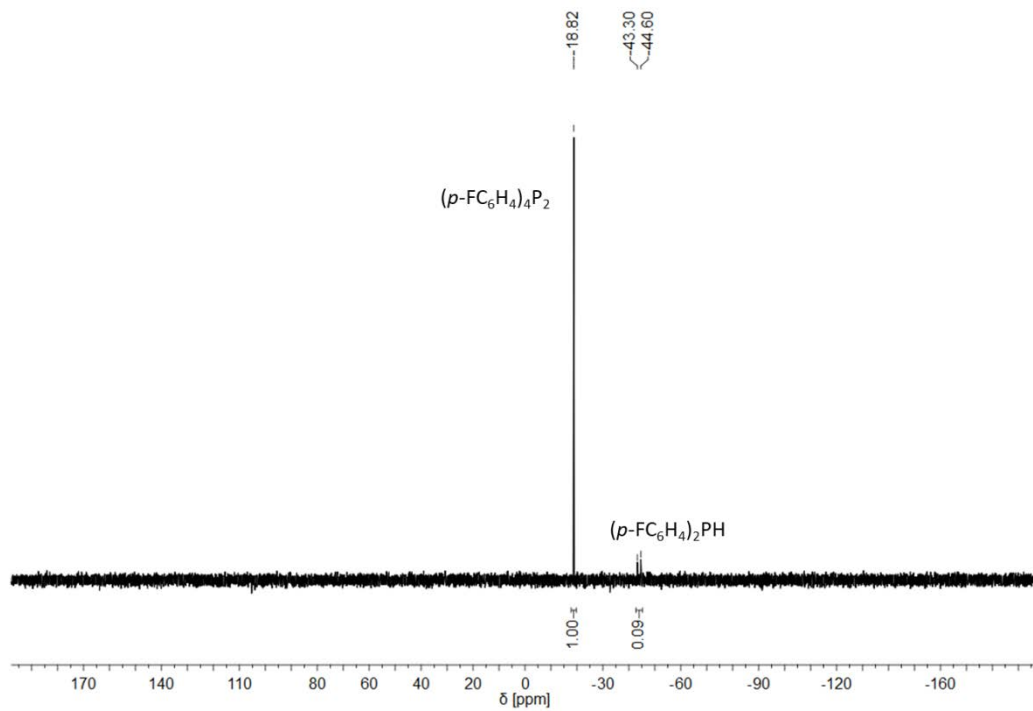

Figure S 90:  $^{31}\text{P}$  NMR spectrum of  $[\text{Et}_4\text{N}]\text{Cl}$  /9-BBN catalyzed reaction of  $(p\text{-FC}_6\text{H}_4)_2\text{P}_2$  with  $\text{PhSiH}_3$  ( $30^\circ\text{C}$ , *o*DFB/MeCN, after 2 hours).

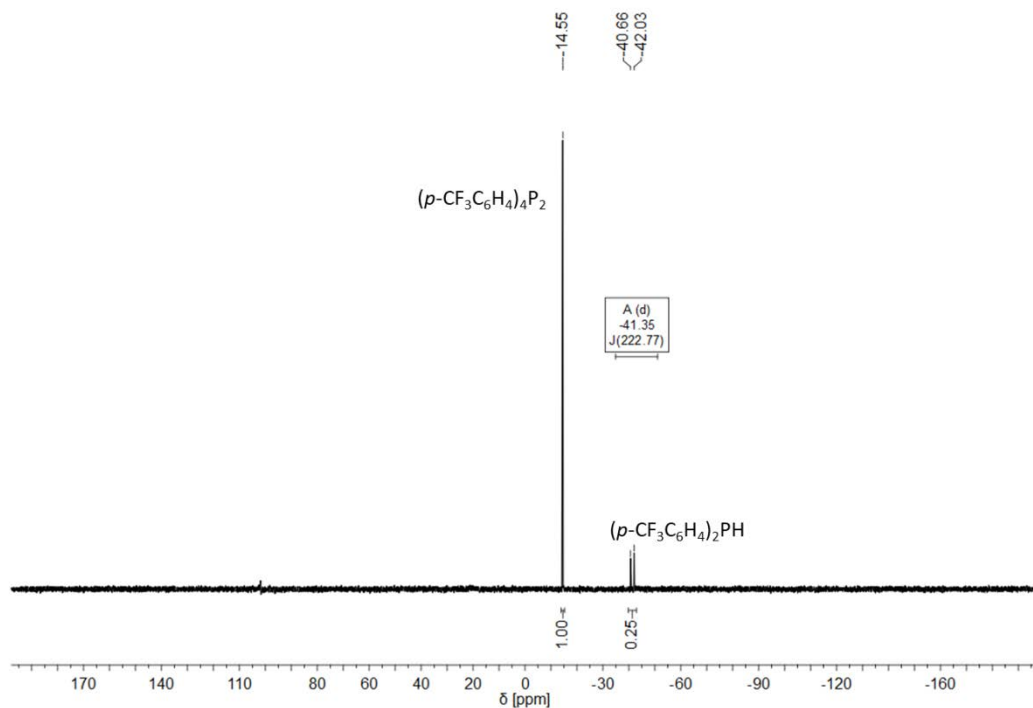

Figure S 91:  $^{31}\text{P}$  NMR spectrum of  $[\text{Et}_4\text{N}]\text{Cl}$  /9-BBN catalyzed reaction of  $(p\text{-CF}_3\text{C}_6\text{H}_4)_2\text{P}_2$  with  $\text{PhSiH}_3$  ( $30^\circ\text{C}$ , *o*DFB/MeCN, after 2 hours).

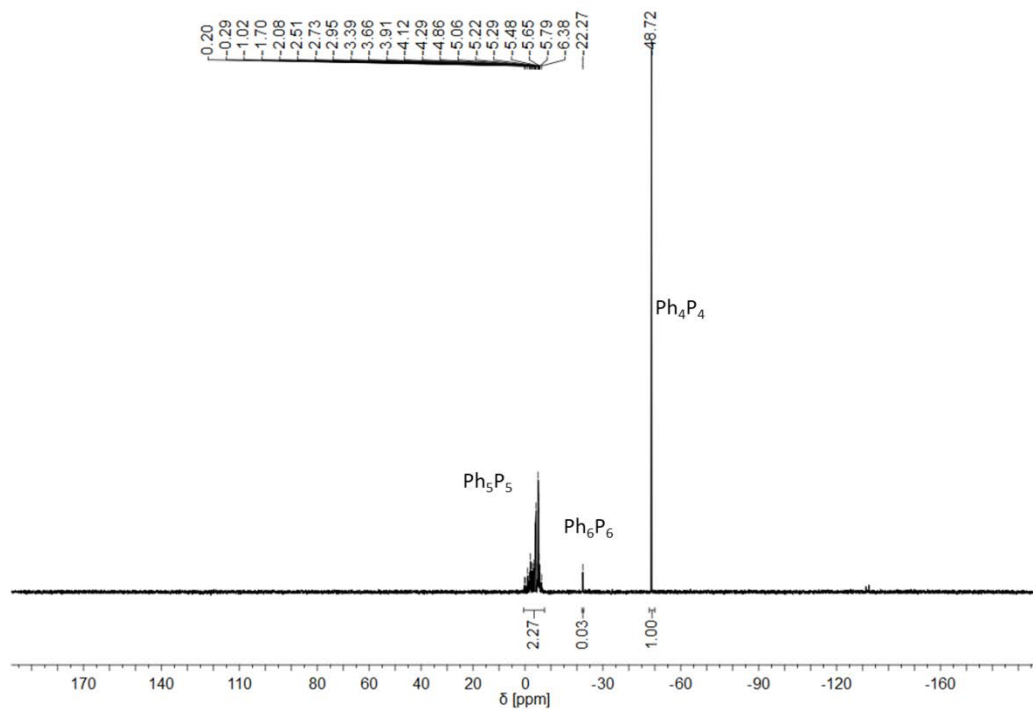

Figure S 92:  $^{31}\text{P}$  NMR spectrum of  $[\text{Et}_4\text{N}]\text{Cl}$  / 9-BBN catalyzed reaction of  $\text{PhCl}_2$  with  $\text{PhSiH}_3$  ( $30^\circ\text{C}$ ,  $o\text{DFB}/\text{MeCN}$ , after 2 hours).

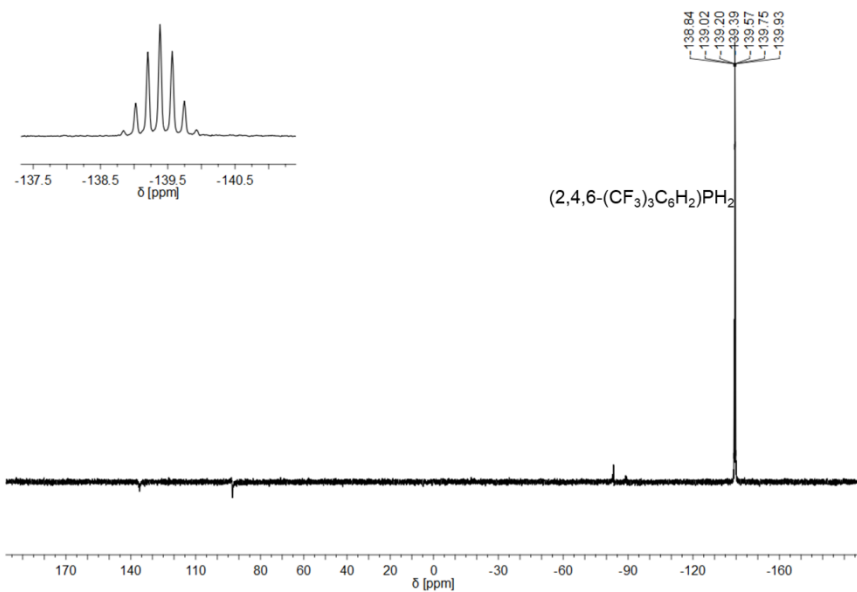

Figure S 93:  $^{31}\text{P}\{^1\text{H}\}$  NMR spectrum of  $[\text{Et}_4\text{N}]\text{Cl}$  / 9-BBN catalyzed reaction of  $(2,4,6\text{-(CF}_3)_3\text{C}_6\text{H}_4)\text{PCl}_2$  with  $\text{PhSiH}_3$  ( $30^\circ\text{C}$ ,  $o\text{DFB}/\text{MeCN}$ , after 4 hours).

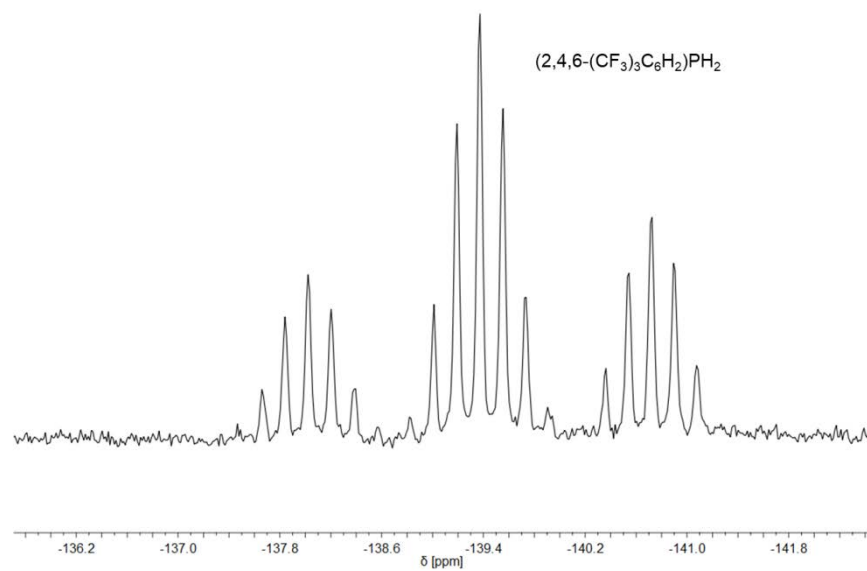

Figure S 94: <sup>31</sup>P NMR spectrum of [Et<sub>4</sub>N]Cl /9-BBN catalyzed reaction of (2,4,6-(CF<sub>3</sub>)<sub>3</sub>C<sub>6</sub>H<sub>4</sub>)PCl<sub>2</sub> with PhSiH<sub>3</sub> (30°C, oDFB/MeCN, after 4 hours).

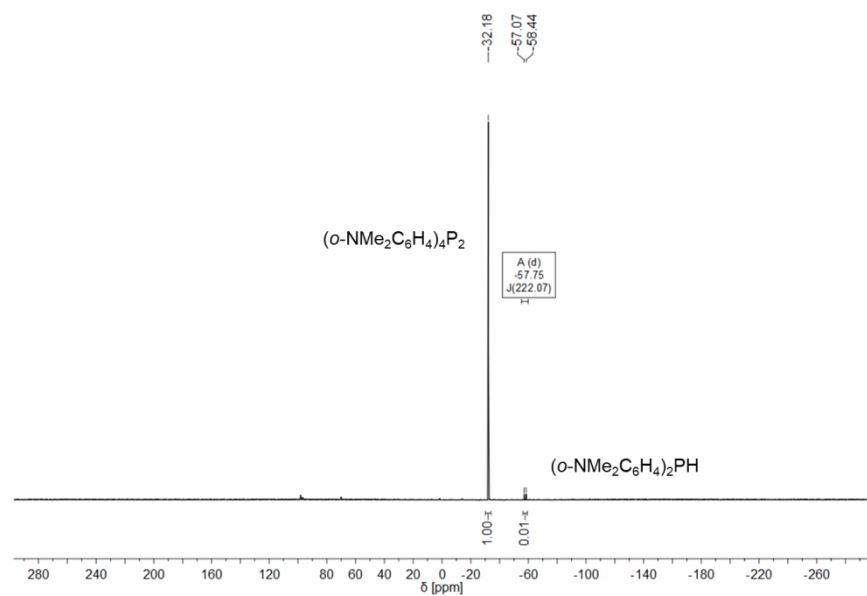

Figure S 95: <sup>31</sup>P NMR spectrum of [Et<sub>4</sub>N]Cl /9-BBN catalyzed reaction of (o-NMe<sub>2</sub>C<sub>6</sub>H<sub>4</sub>)<sub>2</sub>PCl with PhSiH<sub>3</sub> (30°C, oDFB/MeCN, after 4 hours).

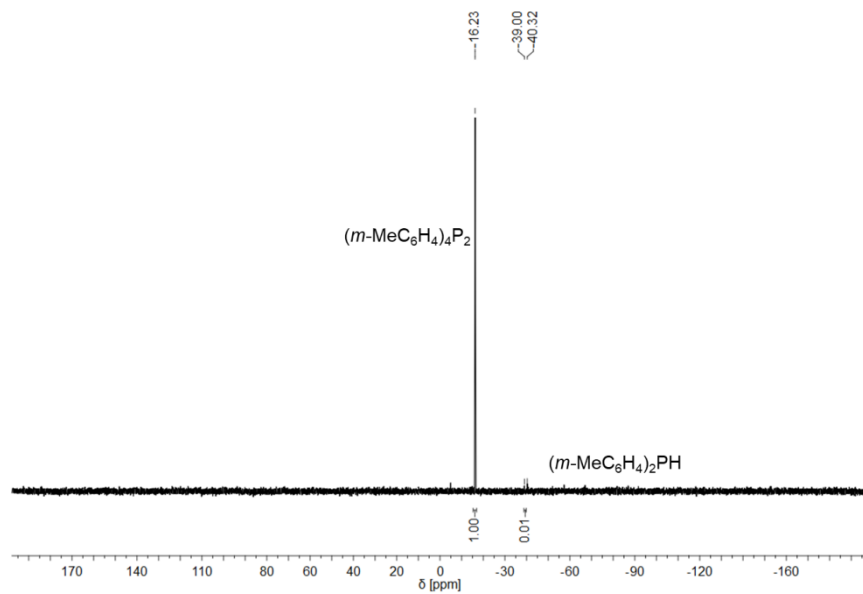

Figure S 96:  $^{31}\text{P}$  NMR spectrum of  $[\text{Et}_4\text{N}]\text{Cl}$  / 9-BBN catalyzed reaction of  $(m\text{-MeC}_6\text{H}_4)_2\text{PCl}$  with  $\text{PhSiH}_3$  ( $30^\circ\text{C}$ ,  $o\text{DFB}/\text{MeCN}$ , after 2 hours).

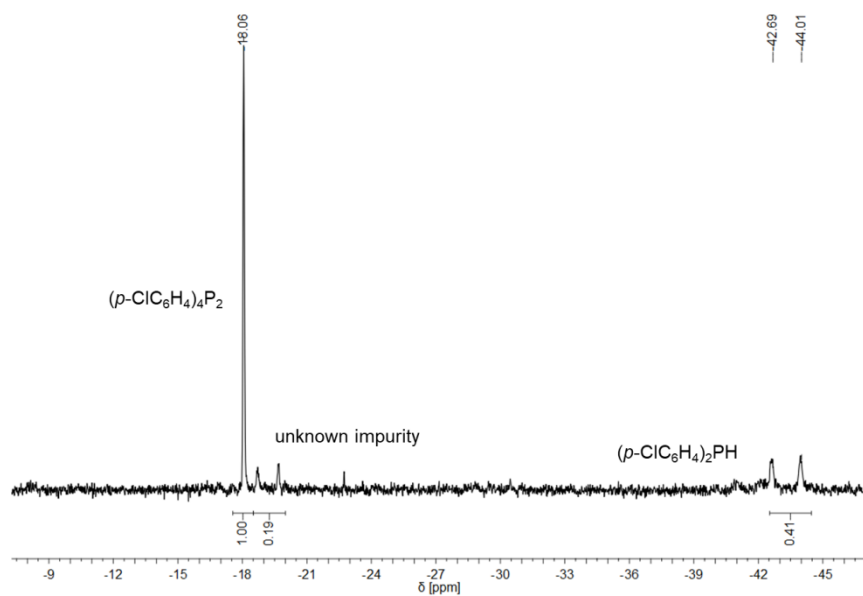

Figure S 97:  $^{31}\text{P}$  NMR spectrum of  $[\text{Et}_4\text{N}]\text{Cl}$  / 9-BBN catalyzed reaction of  $(p\text{-ClC}_6\text{H}_4)_2\text{PCl}$  with  $\text{PhSiH}_3$  ( $30^\circ\text{C}$ ,  $o\text{DFB}/\text{MeCN}$ , after 2 hours).

### 3. Mechanistic investigations

To investigate the mechanism of PH and PP bond formation with 9-BBN several reactions were performed. Reaction of equimolar amounts of 9-BBN with  $\text{Ph}_2\text{PCl}/i\text{Pr}_2\text{PCl}$  and regeneration of 9-BBN from  $\text{Cl-9-BBN}$  and  $\text{PhSiH}_3$  were independently performed to demonstrate feasibility of the proposed catalytic cycle for formation of  $\text{R}_2\text{PH}$  from  $\text{R}_2\text{PCl}$ . The influence of  $[\text{Et}_4\text{N}][\text{Cl}]$  on regeneration of 9-BBN from  $\text{Cl-9-BBN}$  and  $\text{PhSiH}_3$  was investigated. Furthermore dehydrogenative coupling of  $\text{Ph}_2\text{PH}$  by 9-BBN and  $\text{Cl-9-BBN}$  was investigated to probe the mechanism for PP bond formation. Reaction of  $\text{Ph}_2\text{PCl}$  with  $\text{Ph}_2\text{PH}$  was performed in different solvents to demonstrate that  $\text{P}_2\text{Ph}_4$  can be formed under such circumstances.

### 3.1 Reaction of 9-BBN with Ph<sub>2</sub>PCI

9-BBN (11 mg, 0.45 mmol, 1 equiv) and Ph<sub>2</sub>PCI (19.9 mg, 0.45 mmol, 1 equiv) were dissolved in 1,2-dichloroethane (0.6 mL) and stirred at room temperature for 18 hours. The volatiles were removed and the resulting residue washed with *n*-pentane (2x2 mL). The resulting colourless solid was dried under vacuum to afford the Ph<sub>2</sub>PCI Cl-9-BBN adduct in 94% yield (145 mg, 0.042 mmol). NMR data show broad signals, indicating a dynamic adduct. <sup>1</sup>H NMR (CDCl<sub>3</sub>) δ = 7.82-7.76 (m, 4H, Ph<sub>2</sub>PH), 7.56-7.52 (m, 2H, Ph<sub>2</sub>PH), 7.49-7.44 (m, 4H, Ph<sub>2</sub>PH), 6.66 (d, <sup>1</sup>J<sub>HP</sub> = 358 Hz, 1H, PH), 1.99-1.87 (m, 6H, Cl-9-BBN), 1.77 (br s, Cl-9-BBN), 1.64-1.59 (m, 2H, Cl-9-BBN), 1.06 (br s, 2H, Cl-9-BBN) ppm. <sup>31</sup>P NMR (CDCl<sub>3</sub>) δ = -18.9 (d, <sup>1</sup>J<sub>HP</sub> = 358 Hz, 1H, PH) ppm. <sup>11</sup>B NMR (CDCl<sub>3</sub>) δ = 4.8 (br s) ppm. <sup>13</sup>C NMR (CDCl<sub>3</sub>) δ = 134.3 (d, J<sub>CP</sub> = 8.2 Hz), 132.0 (d, J<sub>CP</sub> = 2.5 Hz), 129.3 (d, J<sub>CP</sub> = 10 Hz), 122.7 (d, J<sub>CP</sub> = 54.8 Hz), 31.4 (br s), 24.6-24.7 (br s), 24.8 ppm.

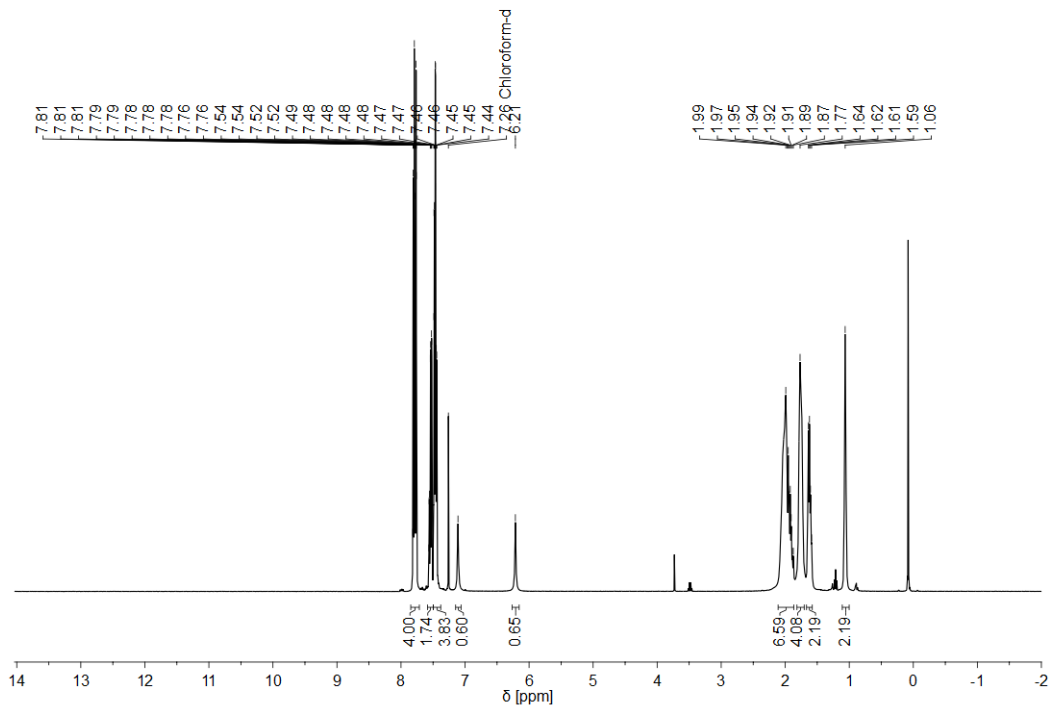

Figure S 98: <sup>1</sup>H NMR spectrum of dynamic adduct of Ph<sub>2</sub>PH and Cl-9-BBN (CDCl<sub>3</sub>).



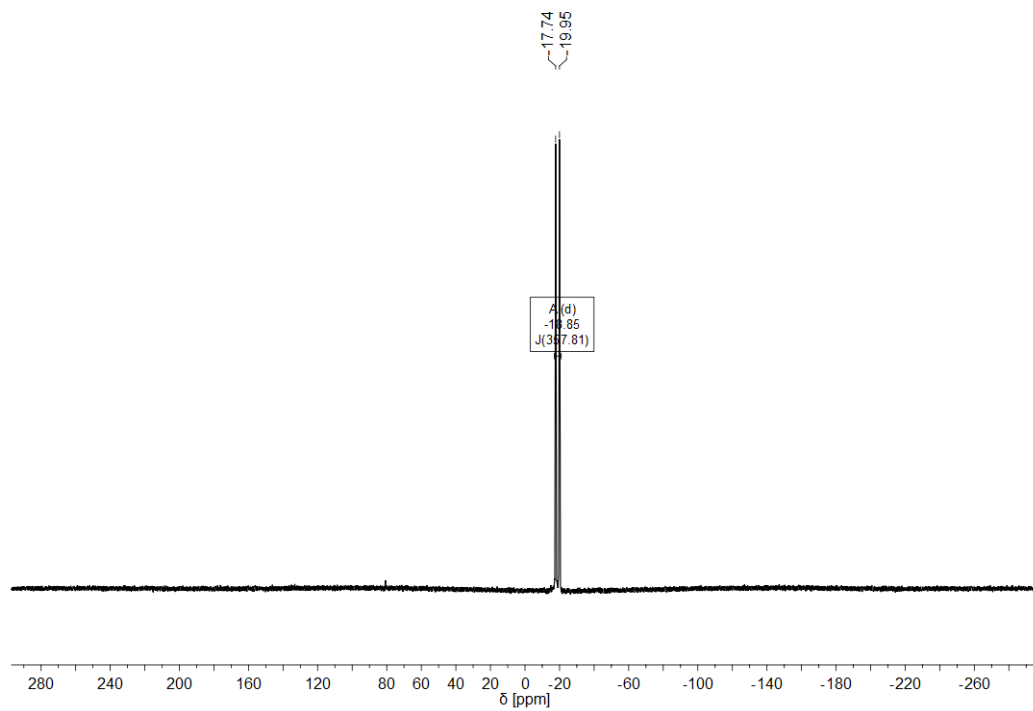

Figure S 99: <sup>31</sup>P NMR spectrum of dynamic adduct of Ph<sub>2</sub>PH and Cl-9-BBN (CDCl<sub>3</sub>).

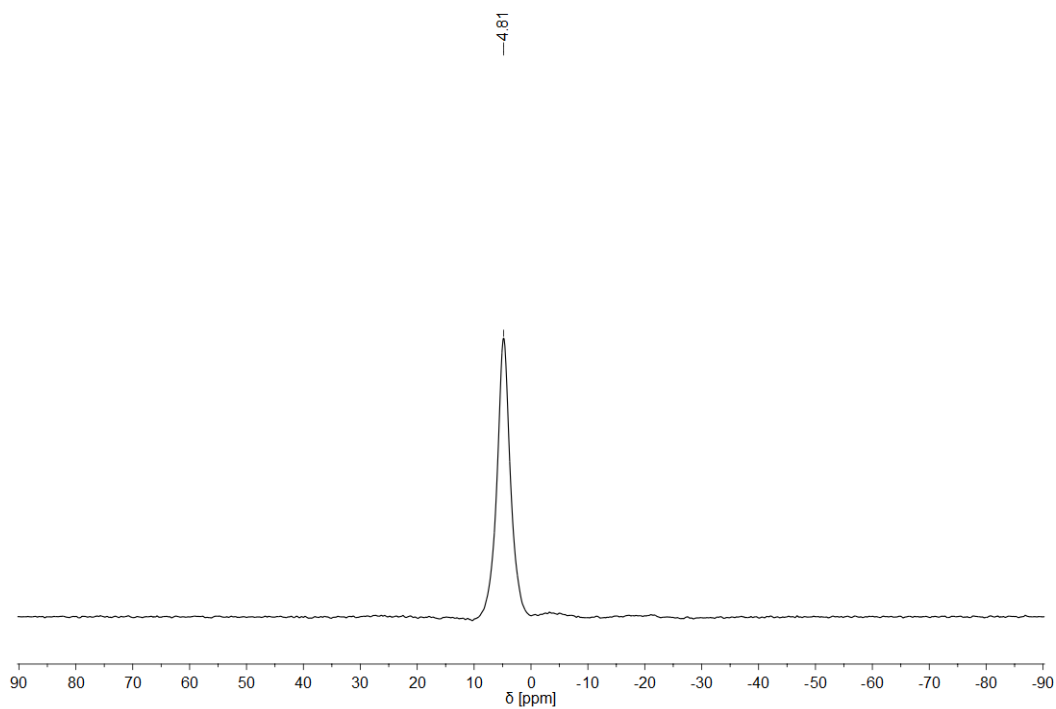

Figure S 100: <sup>11</sup>B NMR spectrum of dynamic adduct of Ph<sub>2</sub>PH and Cl-9-BBN (CDCl<sub>3</sub>).

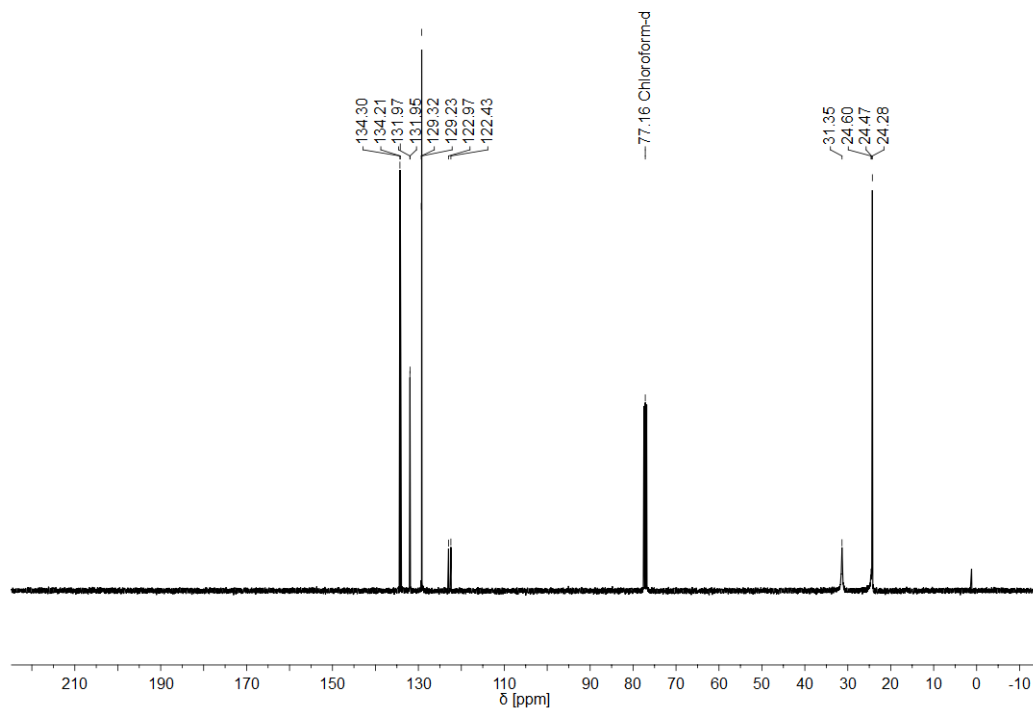

Figure S 101:  $^{13}\text{C}$  NMR spectrum of dynamic adduct of  $\text{Ph}_2\text{PH}$  and  $\text{Cl-9-BBN}$  ( $\text{CDCl}_3$ ).

### 3.2 Reaction of $\text{Cl-9-BBN}$ with $\text{PhSiH}_3$

#### 3.2.1 Without catalyst

$\text{Cl-9-BBN}$  (14.1 mg, 0.09 mmol, 1 equiv) and  $\text{PhSiH}_3$  (10.5 mg, 0.09 mmol, 1 equiv) were dissolved in  $o\text{DFB}$  (0.6 mL) and heated at  $30^\circ\text{C}$  in a J-Young NMR tube. The reaction was monitored by  $^{11}\text{B}$  NMR spectroscopy for 14 h. After 30 minutes mainly  $\text{Cl-9-BBN}$  starting material and hydrolysis-derived  $9\text{-OH-9-BBN}$  were observed in the  $^{11}\text{B}$  NMR spectrum. After 14 hours  $9\text{-BBN}$  product and hydrolysis-derived  $9\text{-OH-9-BBN}$  were observed in the  $^{11}\text{B}$  NMR spectrum.  $9\text{-OH-9-BBN}$  resonance was assigned in accordance with literature.<sup>22</sup>

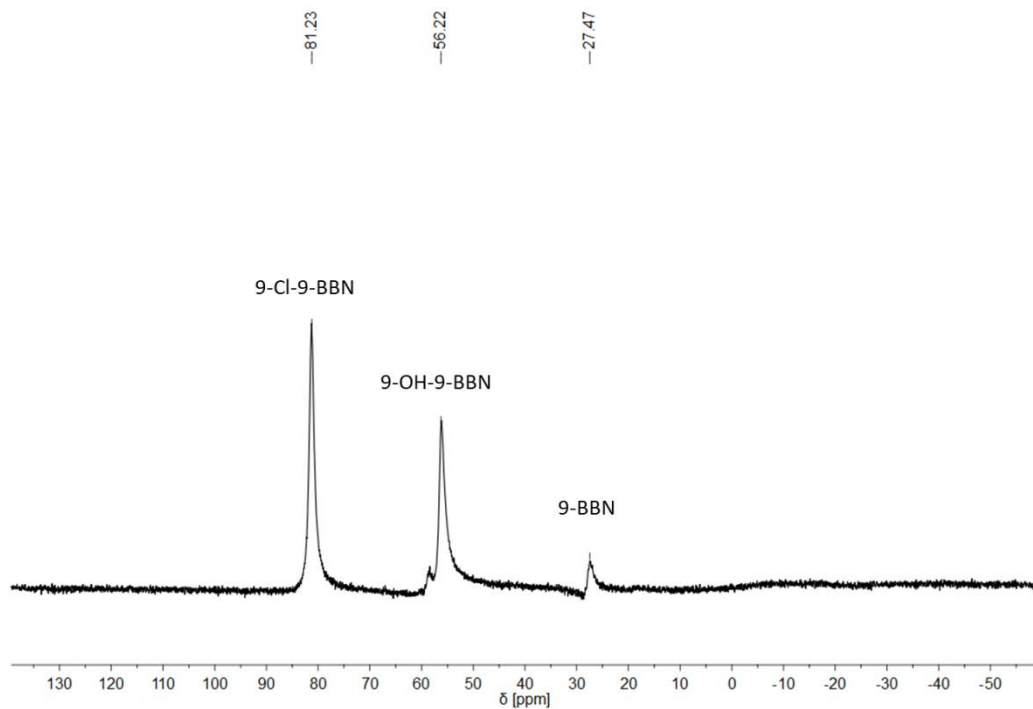

Figure S 102:  $^{11}\text{B}$  NMR spectrum of reaction of Cl-9-BBN with  $\text{PhSiH}_3$  in oDFB after 30 minutes at  $30^\circ\text{C}$ . 9-OH-9-BBN stems from glove box atmosphere-related hydrolysis of Cl-9-BBN.

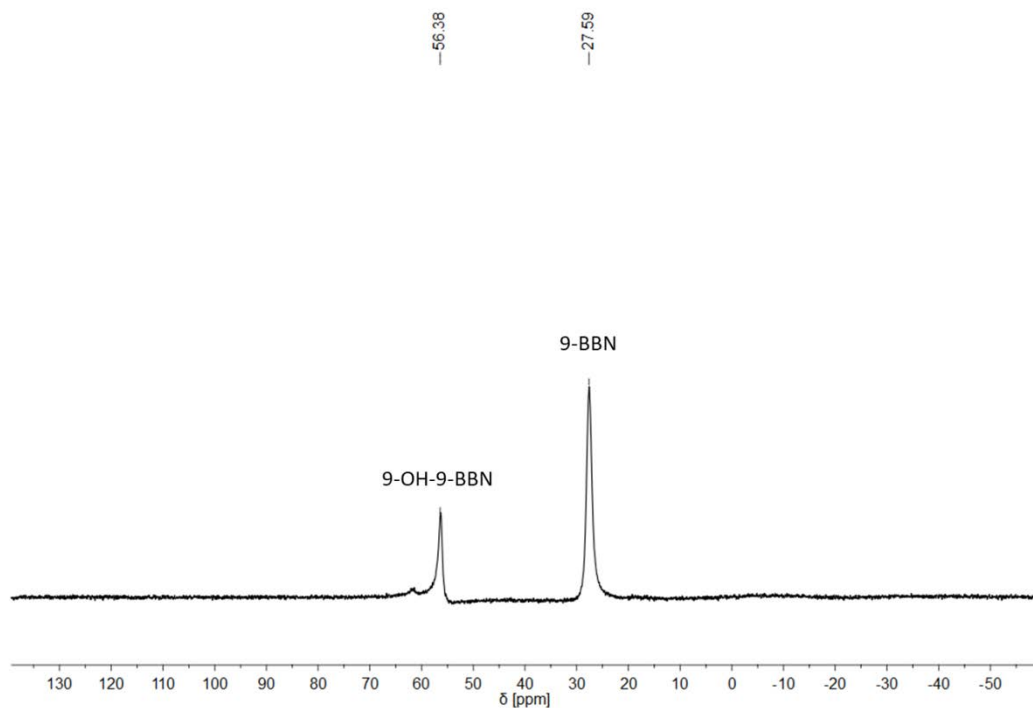

Figure S 103:  $^{11}\text{B}$  NMR spectrum of reaction of Cl-9-BBN with  $\text{PhSiH}_3$  in oDFB after 14 hours at  $30^\circ\text{C}$ . 9-OH-9-BBN stems from glove box atmosphere-related hydrolysis of Cl-9-BBN.

### 3.2.2 With $[\text{Et}_4\text{N}]\text{Cl}$ catalyst

Cl-9-BBN (14.1 mg, 0.09 mmol, 1 equiv),  $\text{PhSiH}_3$  (9.7 mg, 0.09 mmol, 1 equiv) and  $[\text{Et}_4\text{N}]\text{Cl}$  (0.7 mg, 0.005 mmol, 0.05 equiv) were dissolved in oDFB (0.6 mL) and placed in a J-Young NMR tube. The reaction was monitored by  $^{11}\text{B}$  NMR spectroscopy. After 10 minutes at room temperature only 9-BBN and

hydrolysis-derived 9-OH-9-BBN were observed in the  $^{11}\text{B}$  NMR spectrum. 9-OH-9-BBN resonance was assigned in accordance with literature.<sup>22</sup> This accounts for a substantial acceleration compared to the reaction without  $[\text{Et}_4\text{N}]\text{Cl}$ .

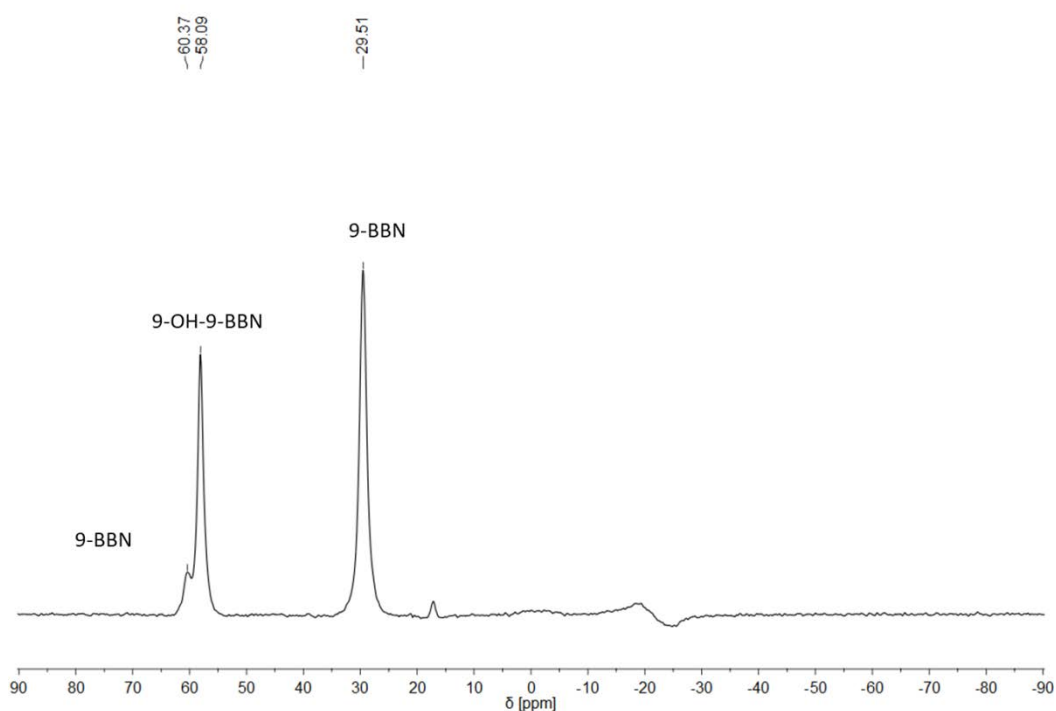

Figure S 104:  $^{11}\text{B}$  NMR spectrum of reaction of Cl-9-BBN with  $\text{PhSiH}_3$  with  $[\text{Et}_4\text{N}]\text{Cl}$  catalyst in oDFB after 10 minutes. 9-OH-9-BBN stems from glove box atmosphere-related hydrolysis of Cl-9-BBN.

### 3.3 Attempted dehydrogenative coupling of $\text{R}_2\text{PH}$ with 9-BBN and Cl-9-BBN

**General procedure:**  $\text{Ph}_2\text{PH}$  (16.8 mg, 0.09 mmol) and the respective boron compound (0.005 mmol, 0.5 equiv) were dissolved in MeCN/oDFB (0.6 mL, 1/2, V/V) and heated to 30 °C in a J-Young tube. The reaction progress was monitored via  $^{31}\text{P}$  NMR spectroscopy.

*In case of Cl-9-BBN:* After 20 hours of reaction time  $\text{Ph}_2\text{PCl}$  (19.9 mg, 0.09 mmol, 1 equiv compared to  $\text{Ph}_2\text{PH}$ ) was added to the reaction mixture and the reaction progress was monitored by  $^{31}\text{P}$  NMR spectroscopy.

### 3.3.1 With Cl-9-BBN

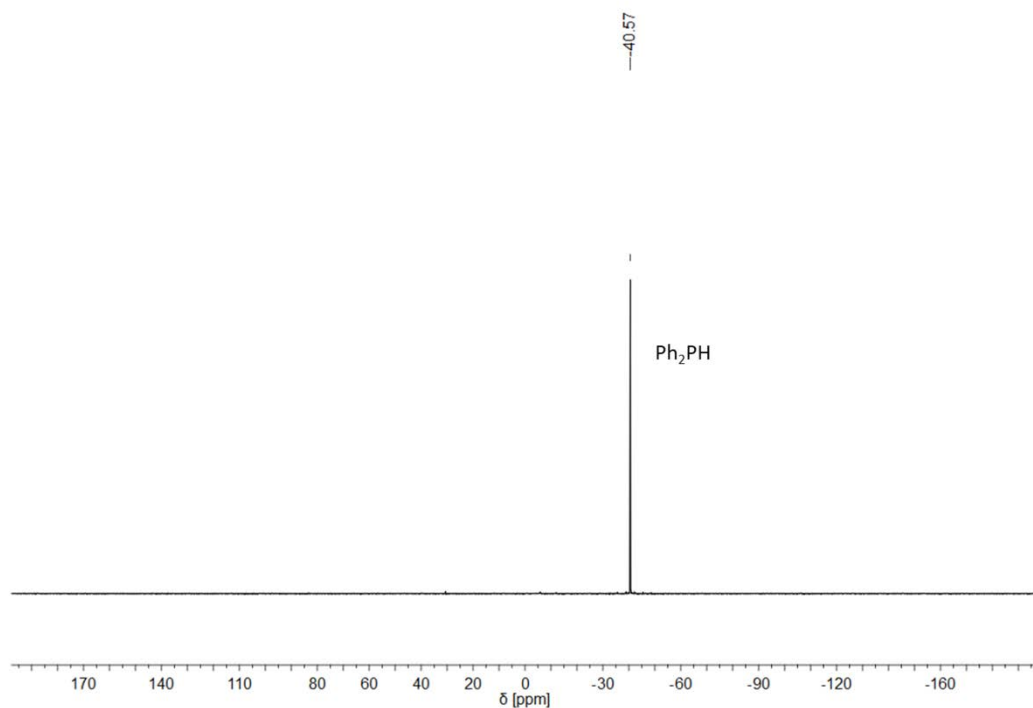

Figure S 105:  $^{31}\text{P}\{^1\text{H}\}$  NMR spectrum of the attempted dehydrogenative coupling of  $\text{Ph}_2\text{PH}$  with catalytic amounts of Cl-9-BBN in oDFB/MeCN at 30 °C after 16 hours.

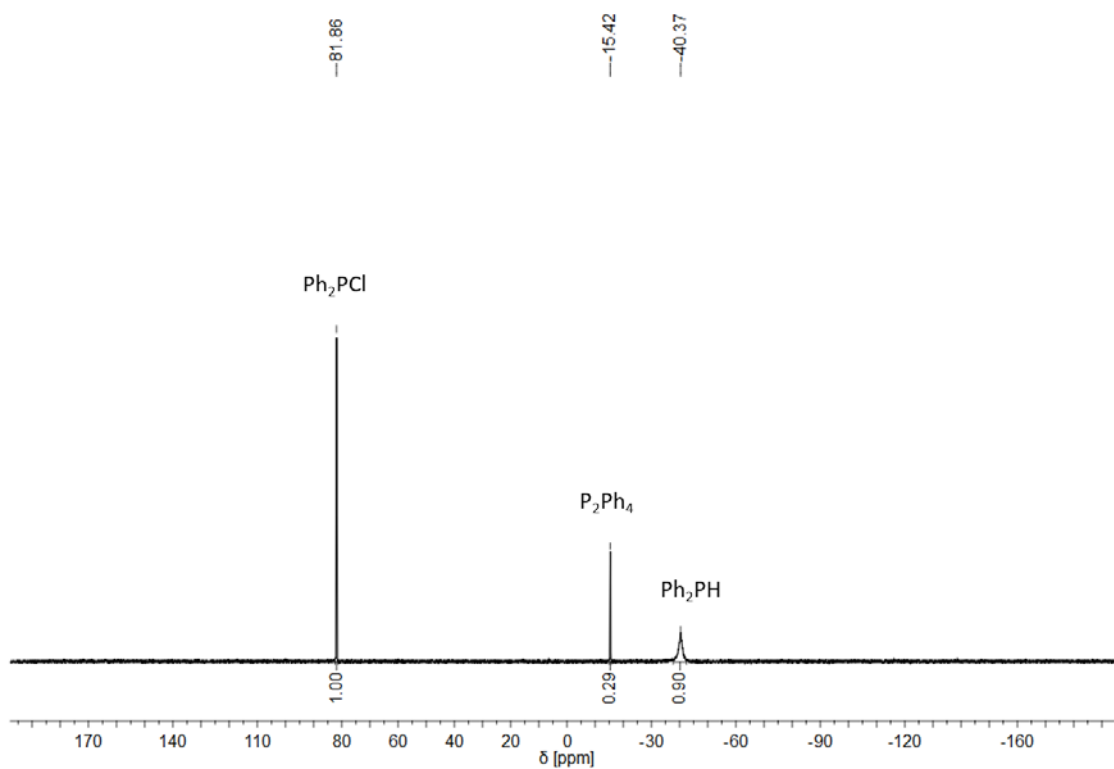

Figure S 106:  $^{31}\text{P}\{^1\text{H}\}$  NMR spectrum of the addition of  $\text{Ph}_2\text{PCL}$  to the reaction mixture of the attempted dehydrogenative coupling of  $\text{Ph}_2\text{PH}$  with catalytic amounts of Cl-9-BBN in oDFB/MeCN at 30 °C; 30 min after the addition of  $\text{Ph}_2\text{PCL}$ .

### 3.3.2 With 9-BBN

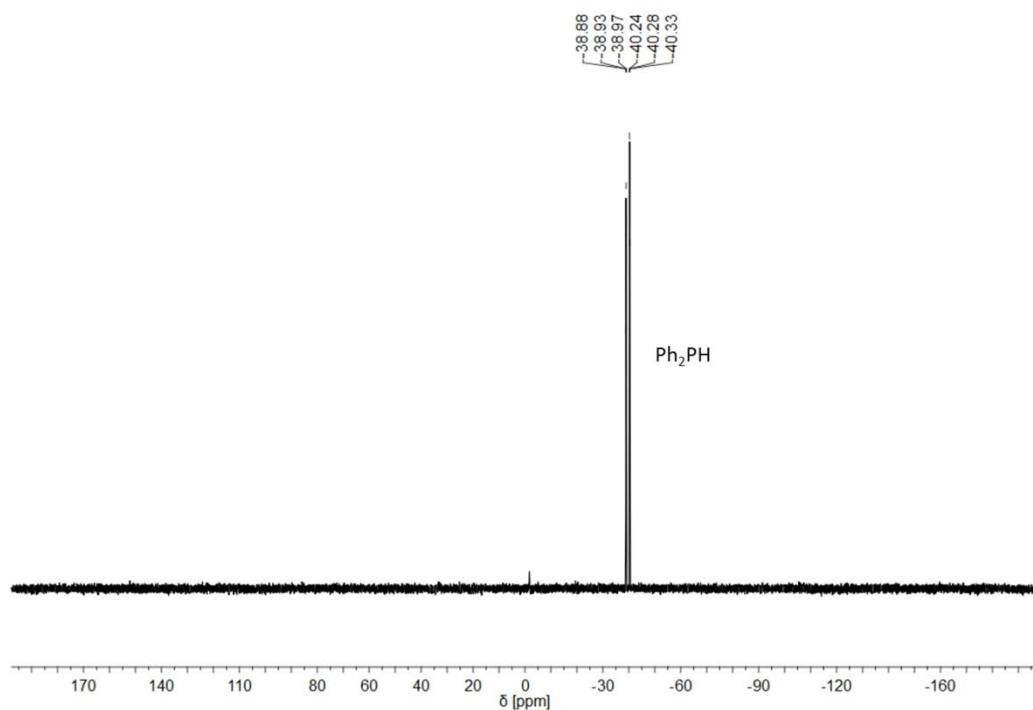

Figure S 107:  $^{31}\text{P}$  NMR spectrum of attempted dehydrogenative coupling of  $\text{Ph}_2\text{PH}$  with catalytic amounts of 9-BBN in  $\text{oDFB}/\text{MeCN}$  at  $30\text{ }^\circ\text{C}$  after 20 hours.

### 3.4 Reaction of $\text{Ph}_2\text{PH}$ with $\text{Ph}_2\text{PCl}$

$\text{Ph}_2\text{PCl}$  (19.9 mg, 0.09 mmol, 1 equiv) and  $\text{Ph}_2\text{PH}$  (16.8 mg, 0.09 mmol, 1 equiv) were dissolved in the respective solvent (0.6 mL) and heated to  $30\text{ }^\circ\text{C}$  in a J-Young tube. After 3 hours a  $^{31}\text{P}$  NMR spectrum was recorded.

### 3.4.1 In toluene

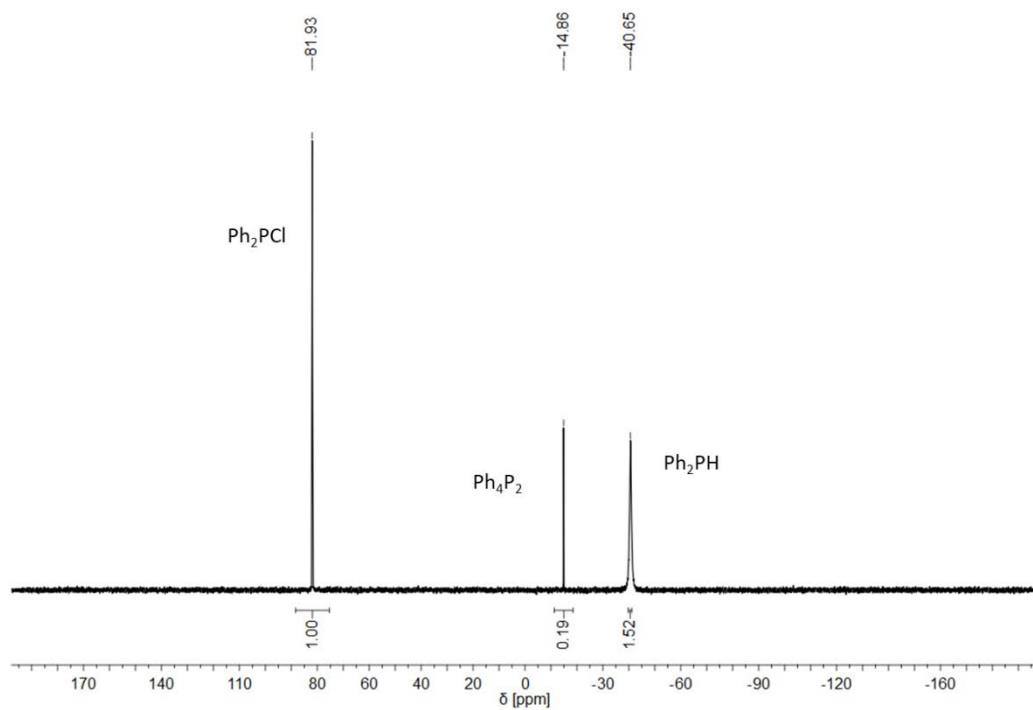

Figure S 108:  $^{31}\text{P}$  NMR spectrum of the reaction of  $\text{Ph}_2\text{PCl}$  with  $\text{Ph}_2\text{PH}$  at  $30^\circ\text{C}$  in toluene after 3 hours.

### 3.4.2 In oDCB

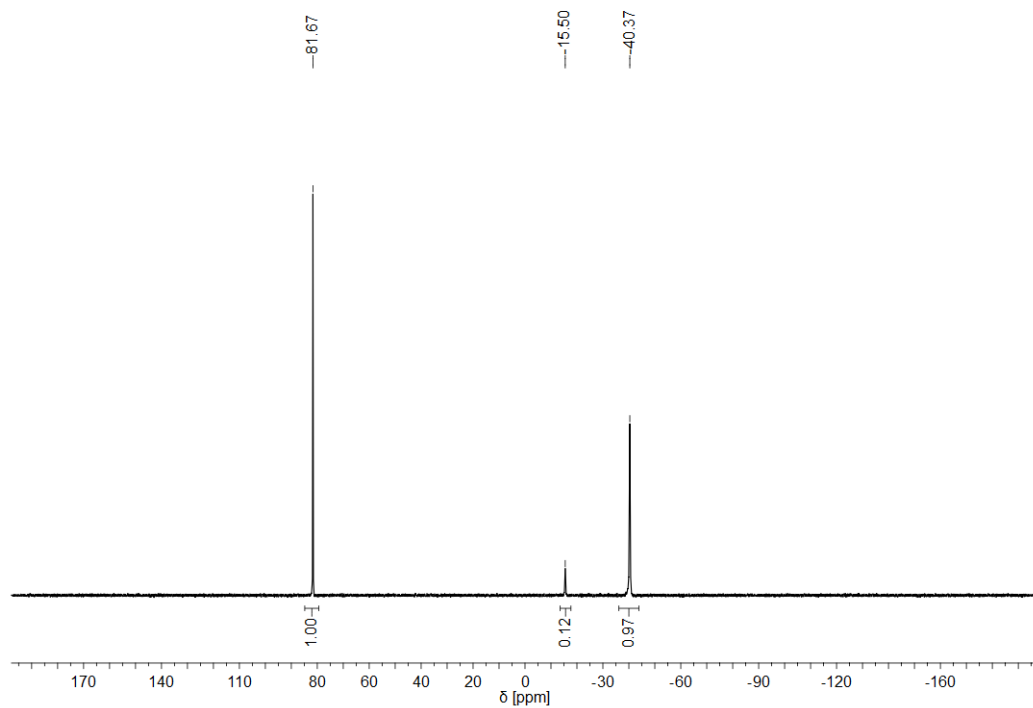

Figure S 109:  $^{31}\text{P}$  NMR spectrum of the reaction of  $\text{Ph}_2\text{PCl}$  with  $\text{Ph}_2\text{PH}$  at  $30^\circ\text{C}$  in oDCB after 3 hours.

### 3.4.3 In oDFB

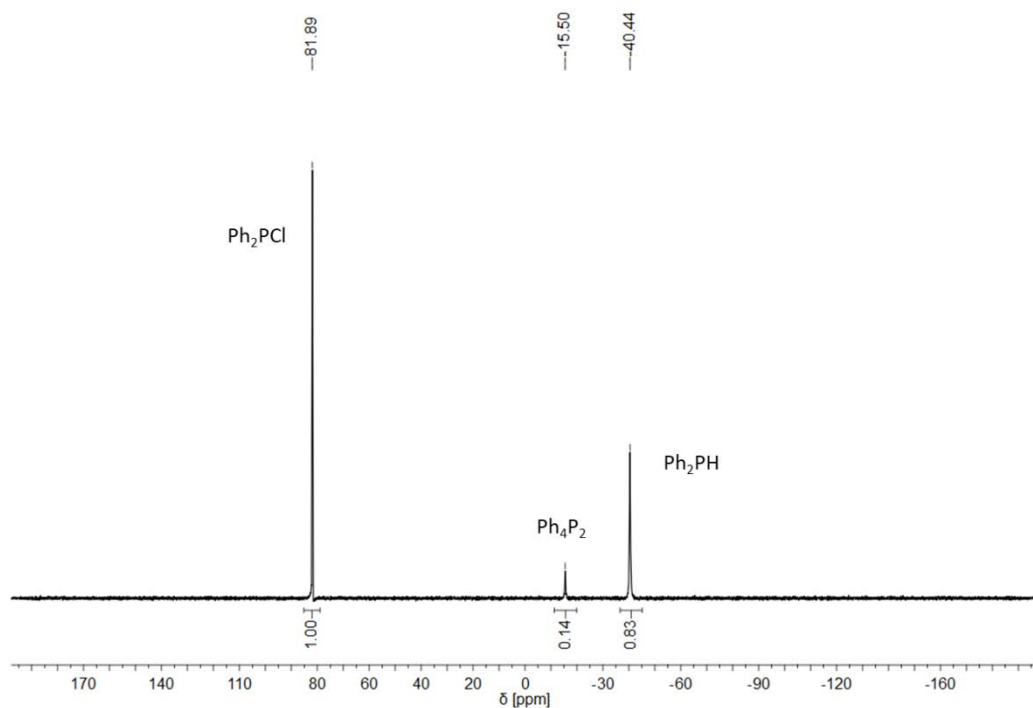

Figure S 110:  $^{31}\text{P}$  NMR spectrum of the reaction of  $\text{Ph}_2\text{PCl}$  with  $\text{Ph}_2\text{PH}$  at 30 °C in oDFB after 3 hours.

### 3.4.4 In oDFB/MeCN

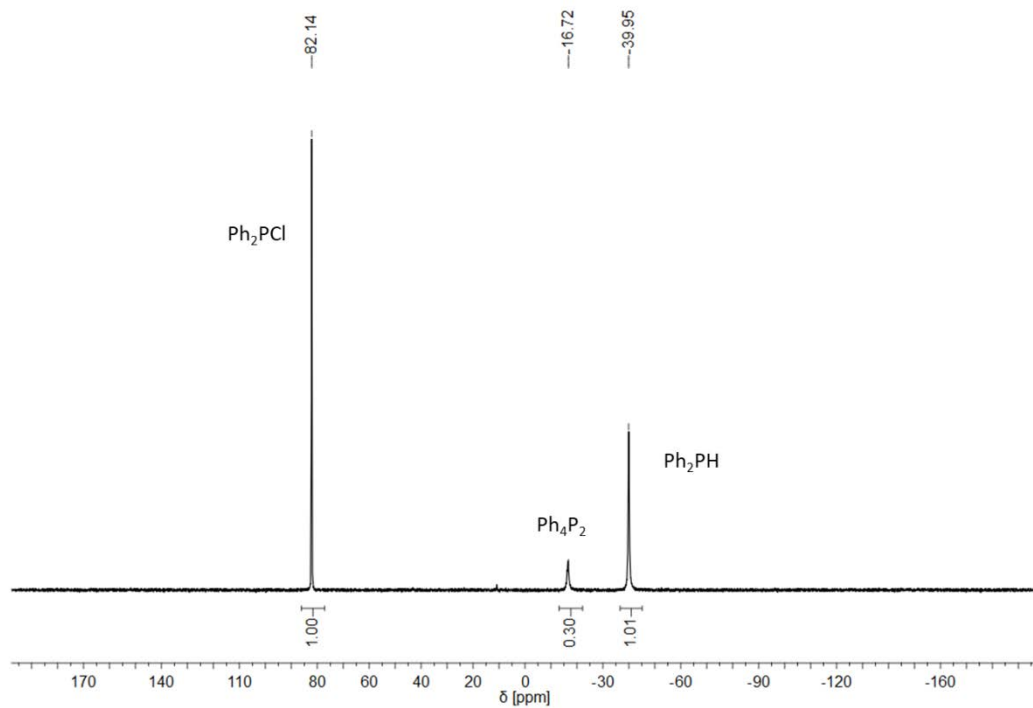

Figure S 111:  $^{31}\text{P}$  NMR spectrum of the reaction of  $\text{Ph}_2\text{PCl}$  with  $\text{Ph}_2\text{PH}$  at 30 °C in oDFB/MeCN after 3 hours.

### 3.5 Reaction of $t\text{Bu}_2\text{PH}$ with $t\text{Bu}_2\text{PCl}$

$t\text{Bu}_2\text{PCl}$  (16.3 mg, 0.09 mmol) and  $t\text{Bu}_2\text{PH}$  (13.2 mg, 0.09 mmol) were dissolved in oDFB/MeCN (0.6 mL, 2/1, V/V) and heated to 80 °C for 24 h. The reaction progress was monitored via  $^{31}\text{P}$  NMR spectroscopy.



After 24 h PhSiH<sub>3</sub> (4.9 mg, 0.05 mmol) was added and the mixture heated to 80 °C. The reaction progress was monitored by <sup>31</sup>P NMR spectroscopy.

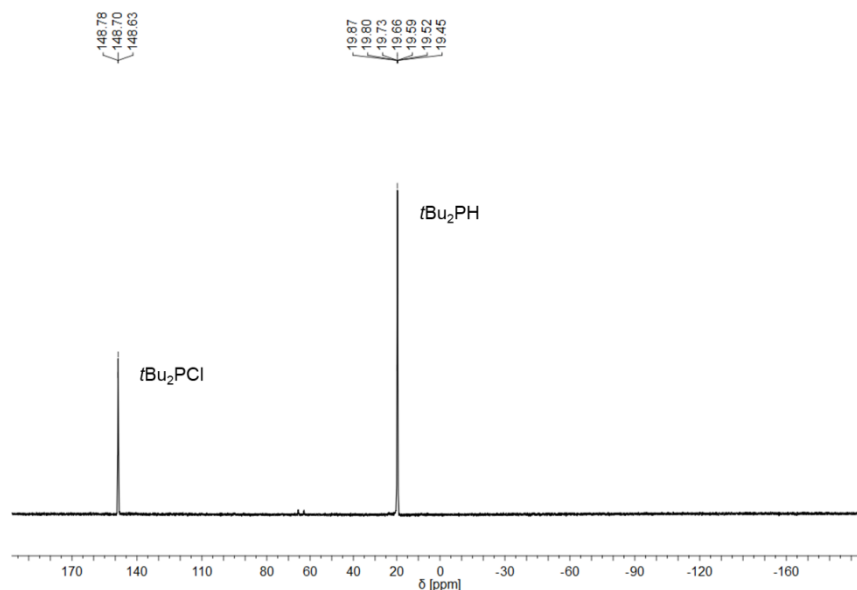

Figure S 112: <sup>31</sup>P NMR spectrum of reaction of tBu<sub>2</sub>PCl with tBu<sub>2</sub>PH in oDFB/MeCN after 24 h at 80 °C.

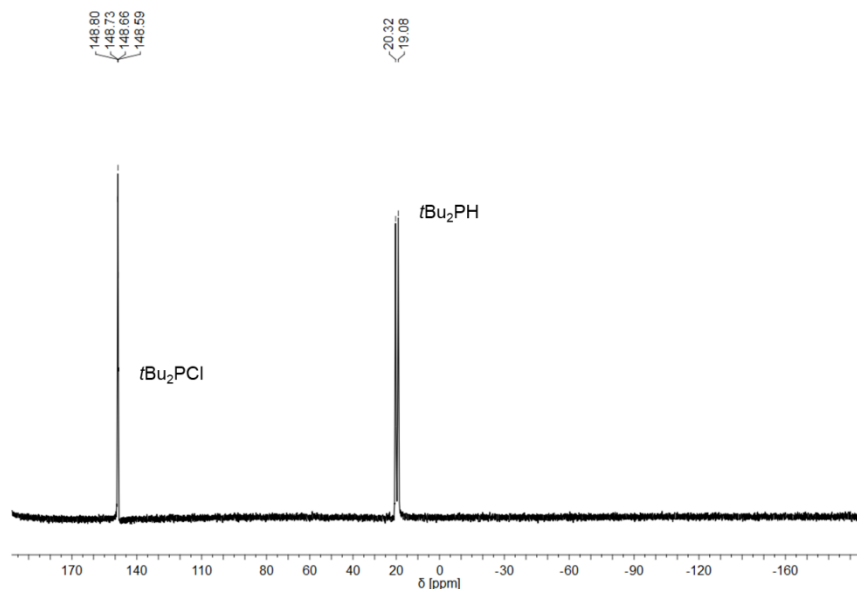

Figure S 113: <sup>31</sup>P NMR spectrum of reaction of tBu<sub>2</sub>PCl with tBu<sub>2</sub>PH and PhSiH<sub>3</sub> in oDFB/MeCN after 48 h at 80 °C.

### 3.6 Chlorination of PhSiH<sub>3</sub> with HCl

Chlorination of PhSiH<sub>3</sub> with HCl as a critical step in PP bond formation from R<sub>2</sub>PH and R<sub>2</sub>PCl was investigated and the influence of catalytic amounts of [Et<sub>4</sub>N]Cl was demonstrated. Addition of 9-BBN did not have an impact on chlorination of PhSiH<sub>3</sub> with HCl.

#### 3.6.1 Without catalyst

PhSiH<sub>3</sub> (9.7 mg, 0.09 mmol, 1 equiv) was dissolved in MeCN-d<sub>3</sub> (0.3 mL) and 1,2-dichloroethane (2 drops, internal standard for <sup>1</sup>H NMR spectroscopy) was added. A reference <sup>1</sup>H NMR spectrum was measured.

HCl in diethyl ether (1 M, 0.36 mL, 0.36 mmol, 4 equiv) was added, the mixture was kept at 30°C in a J-Young NMR tube and the reaction progress was monitored via  $^1\text{H}$  NMR spectroscopy.

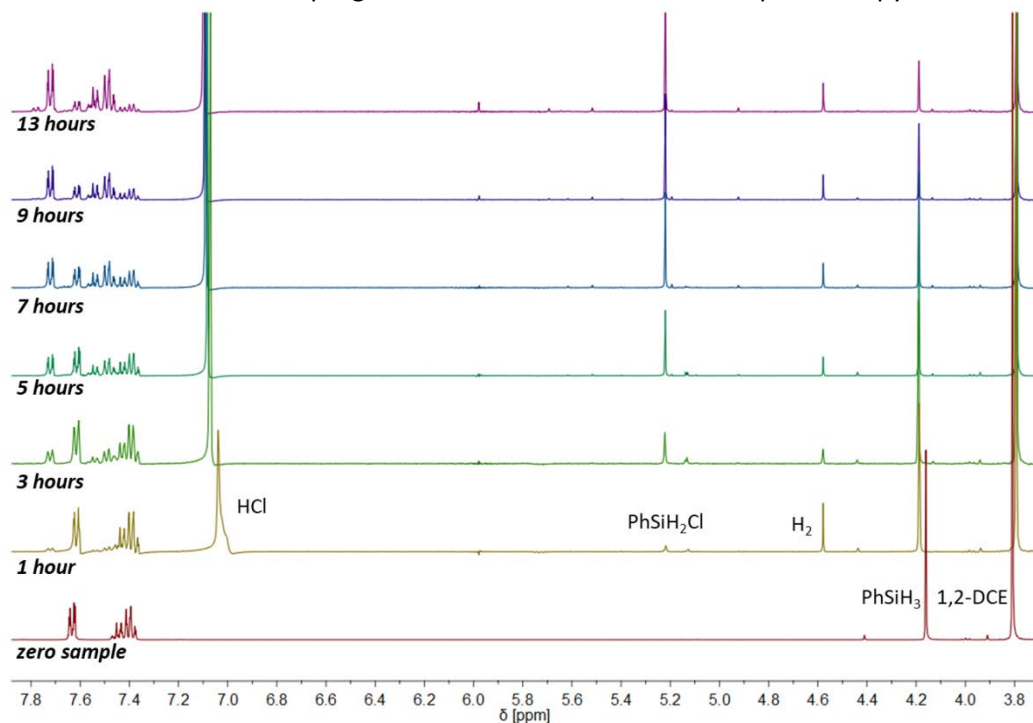

Figure S 114:  $^1\text{H}$  NMR spectrum of reaction of  $\text{PhSiH}_3$  with HCl at 30 °C in  $\text{MeCN-d}_3$  after indicated time intervals. Zero sample: before addition of HCl. Spectrum is magnified to facilitate recognition of important resonances.

### 3.6.2 With 9-BBN

$\text{PhSiH}_3$  (9.7 mg, 0.18 mmol, 1 equiv) and 9-BBN (0.5 mg, 0.005 mmol, 0.05 equiv) were dissolved in  $\text{MeCN-d}_3$  (0.3 mL) and 1,2-dichloroethane (2 drops, internal standard for  $^1\text{H}$  NMR spectroscopy) was added. A reference  $^1\text{H}$  NMR spectrum was measured. HCl in diethyl ether (1 M, 0.36 mL, 0.36 mmol, 4 equiv) was added, the mixture was kept at 30°C in a J-Young NMR tube and the reaction progress was monitored via  $^1\text{H}$  NMR spectroscopy.

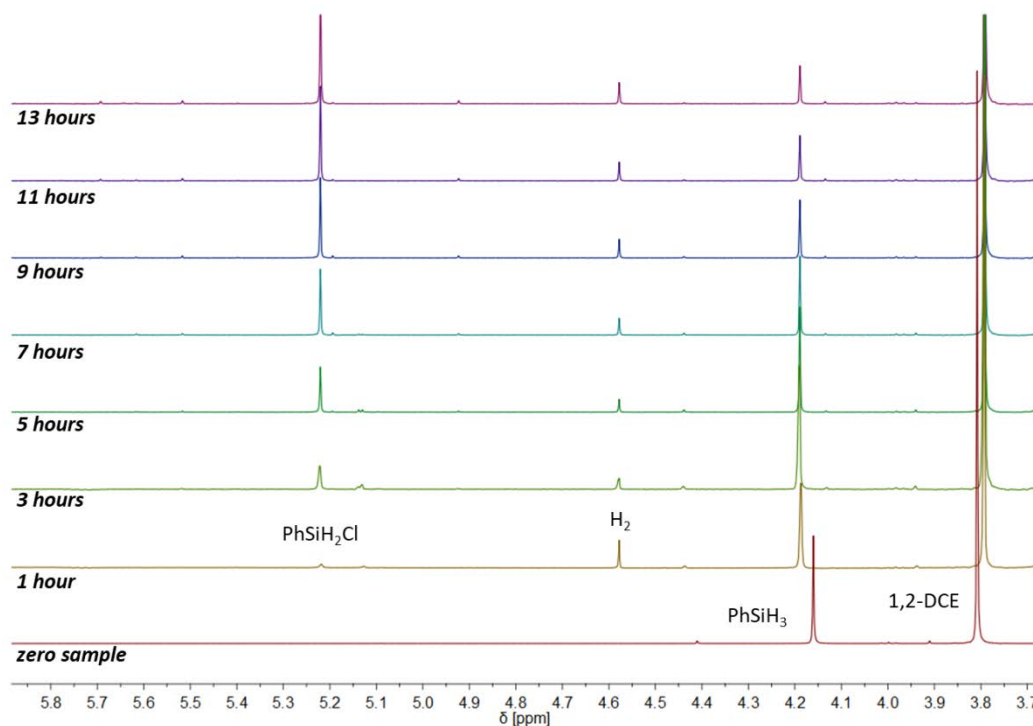

Figure S 115:  $^1\text{H}$  NMR spectrum of reaction of  $\text{PhSiH}_3$  with  $\text{HCl}$  and  $9\text{-BBN}$  at  $30^\circ\text{C}$  in  $\text{MeCN-d}_3$  after indicated time intervals. Zero sample: before addition of  $\text{HCl}$ . Spectrum is magnified to facilitate recognition of important resonances.

### 3.6.3 With $[\text{Et}_4\text{N}]\text{Cl}$

$\text{PhSiH}_3$  (19.5 mg, 0.18 mmol, 1 equiv) and  $[\text{Et}_4\text{N}]\text{Cl}$  (1.5 mg, 0.01 mmol, 0.05 equiv) were dissolved in  $\text{MeCN-d}_3$  (0.3 mL) and 1,2-dichloroethane (2 drops, internal standard for  $^1\text{H}$  NMR spectroscopy) was added. A reference  $^1\text{H}$  NMR spectrum was measured.  $\text{HCl}$  in diethyl ether (1 M, 0.36 mL, 0.36 mmol, 2 equiv) was added, the mixture was kept at  $30^\circ\text{C}$  in a J-Young NMR tube and the reaction progress was monitored via  $^1\text{H}$  NMR spectroscopy. After 2 hours full consumption of  $\text{PhSiH}_3$  is observed. Resonances for the silanes<sup>23</sup>  $\text{PhSiH}_3$  ( $\delta=4.16$  ppm),  $\text{PhSiH}_2\text{Cl}$  ( $\delta=5.22$  ppm),  $\text{PhSiHCl}_2$  ( $\delta=5.98$  ppm) and for  $\text{H}_2$  ( $\delta=4.58$  ppm)<sup>7</sup> were assigned by comparison with literature.

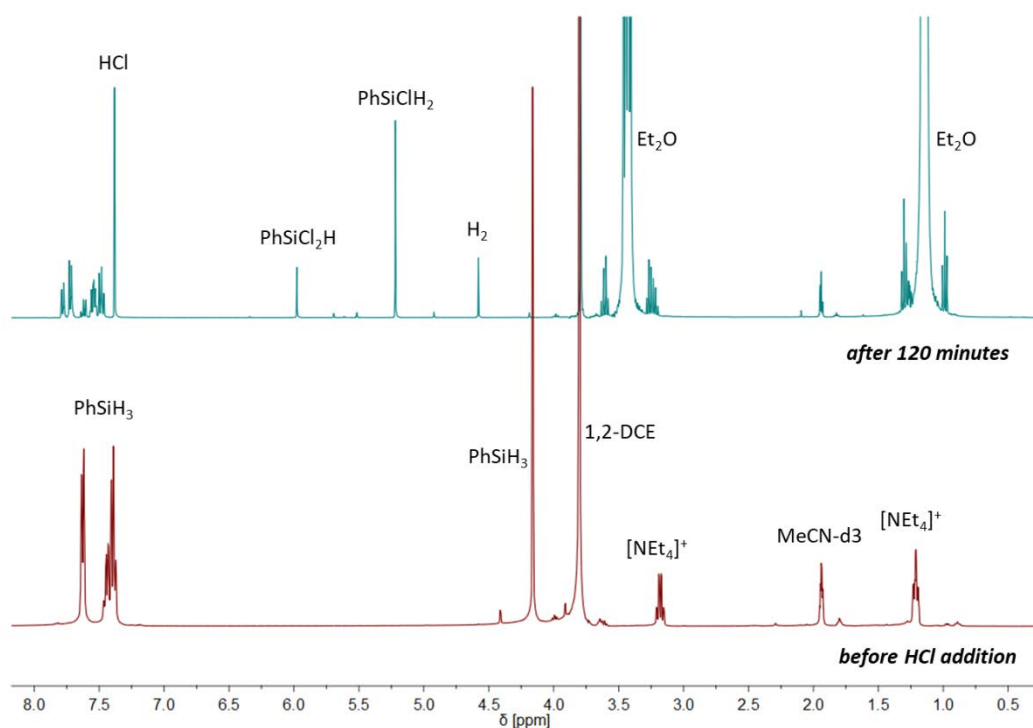

Figure S 116:  $^1\text{H}$  NMR spectra of  $[\text{Et}_4\text{N}]\text{Cl}$  catalyzed chlorination of  $\text{PhSiH}_3$  with  $\text{HCl}$  in  $\text{MeCN-d}_3$ . *Bottom*: Before addition of  $\text{HCl}$ . *Top*: Reaction mixture after 120 minutes at  $30^\circ\text{C}$ .

### 3.7 Test for radical mechanism

To rule out a radical mechanism for  $\text{PP}$  bond formation we performed the reaction of  $\text{Ph}_2\text{PCI}$  with  $\text{PhSiH}_3$  under  $[\text{Et}_4\text{N}]\text{Cl}$  catalysis in the presence of radical scavengers. The two investigated radical scavengers (2,2,6,6-Tetramethylpiperidinyloxy (TEMPO), 9,10-dihydroanthracene) did not slow down the reaction, thereby indicating that no radicals are involved in  $\text{PP}$  bond formation.

$\text{Ph}_2\text{PCI}$  (19.9 mg, 0.09 mmol, 1 equiv),  $\text{PhSiH}_3$  (9.7 mg, 0.09 mmol, 1 equiv),  $[\text{Et}_4\text{N}]\text{Cl}$  (0.7 mg, 0.005 mmol, 0.5 equiv) and the appropriate radical scavenger (0.09 mmol, 1 equiv) were dissolved in a mixture of  $o\text{DFB}/\text{MeCN}$  (0.6 mL, 2/1, V/V) in a J-Young tube and heated to  $30^\circ\text{C}$ . The reaction progress was followed by  $^{31}\text{P}$  NMR spectroscopy. A reference reaction without radical scavenger was run at the same time.

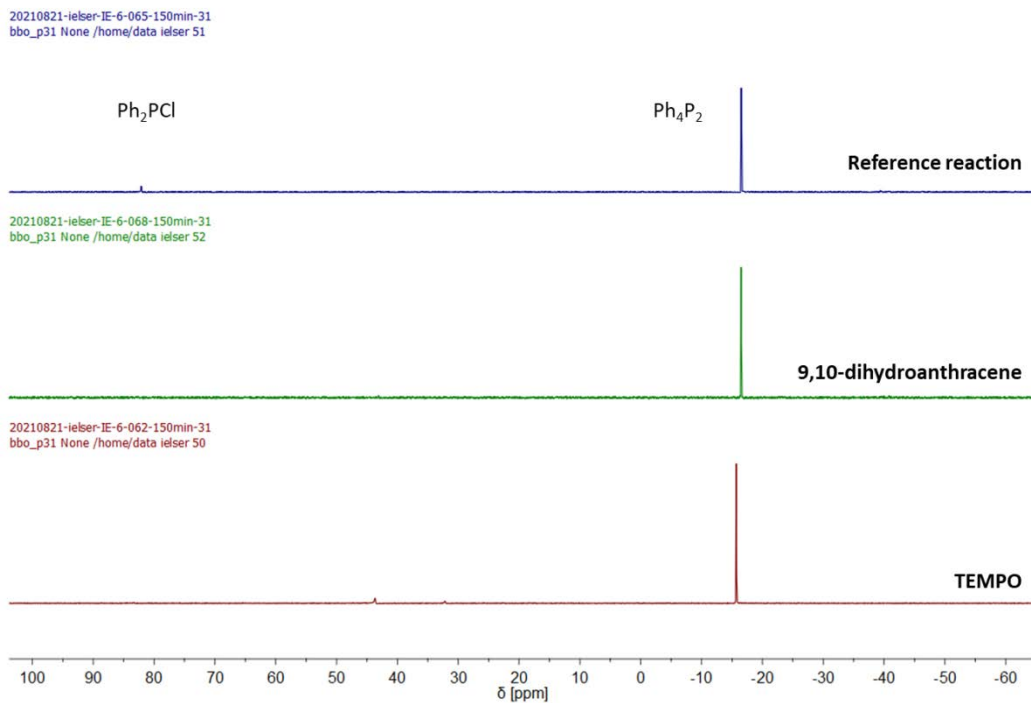

**Figure S 117: Stack of <sup>31</sup>P NMR spectra of the reaction of Ph<sub>2</sub>PCl with PhSiH<sub>3</sub> catalyzed by [Et<sub>4</sub>N]Cl in the presence of radical scavengers after 150 min.**

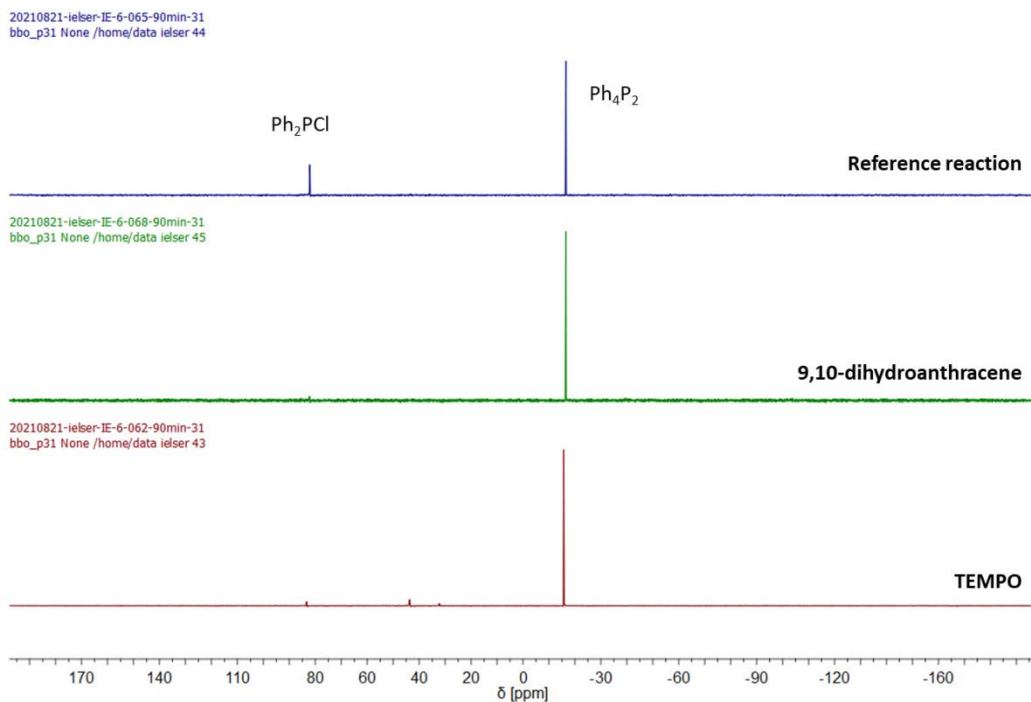

**Figure S 118: Stack of <sup>31</sup>P NMR spectra of the reaction of Ph<sub>2</sub>PCl with PhSiH<sub>3</sub> catalyzed by [Et<sub>4</sub>N]Cl in the presence of radical scavengers after 90 min.**

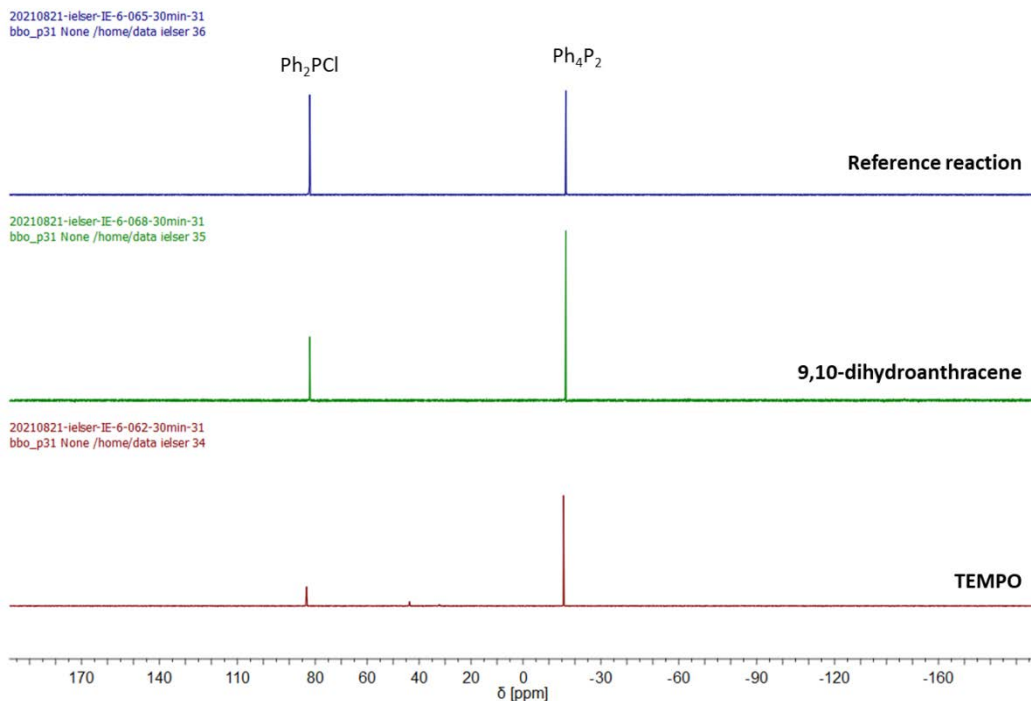

Figure S 119: Stack of  $^{31}\text{P}$  NMR spectra of the reaction of  $\text{Ph}_2\text{PCl}$  with  $\text{PhSiH}_3$  catalyzed by  $[\text{Et}_4\text{N}]\text{Cl}$  in the presence of radical scavengers after 30 min.

### 3.8 Test for silylium catalysis

To rule out silylium-based catalysis,<sup>24-27</sup> by silane activation with 9-BBN or 9-Cl-BBN we performed the reaction of  $\text{Ph}_2\text{PCl}$  with  $\text{PhSiH}_3$  or  $\text{Et}_3\text{SiH}$  with  $[\text{CPh}_3][\text{B}(\text{C}_6\text{F}_5)_4]$  instead of 9-BBN.  $[\text{CPh}_3][\text{B}(\text{C}_6\text{F}_5)_4]$  has been shown to generate catalytically active silylium by hydride abstraction.<sup>26</sup> In our hands, under the optimized reaction conditions (0.5 mol%  $[\text{CPh}_3][\text{B}(\text{C}_6\text{F}_5)_4]$ , 30 °C, 1 equiv silane, solvent) usage of  $[\text{CPh}_3][\text{B}(\text{C}_6\text{F}_5)_4]$  did not lead to any conversion, thereby ruling out a silylium-based mechanism.

#### 3.8.1 With $\text{PhSiH}_3$

$\text{Ph}_2\text{PCl}$  (19.9 mg, 0.09 mmol, 1 equiv),  $\text{PhSiH}_3$  (9.7 mg, 0.09 mmol, 1 equiv) and  $[\text{CPh}_3][\text{B}(\text{C}_6\text{F}_5)_4]$  (4.2 mg, 0.005 mmol, 0.5 equiv) were dissolved in a mixture of *o*DFB/MeCN (0.6 mL, 2/1, V/V) in a J-Young tube and heated to 30°C. The reaction progress was followed by  $^{31}\text{P}$  NMR spectroscopy. After 17 hours no conversion of  $\text{Ph}_2\text{PCl}$  was observed.

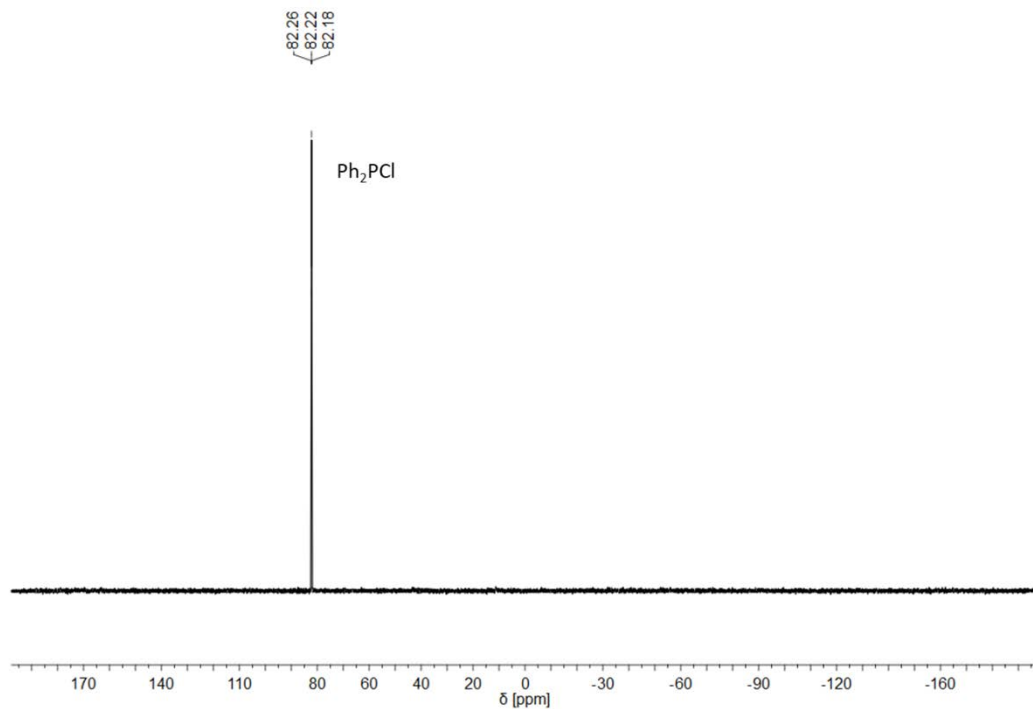

Figure S 120:  $^{31}\text{P}$  NMR spectrum of the reaction of  $\text{Ph}_2\text{PCI}$  with  $\text{PhSiH}_3$  in the presence of  $[\text{CPh}_3][\text{B}(\text{C}_6\text{F}_5)_4]$  (30 °C, *o*DFB/MeCN, 17 h).

$\text{Ph}_2\text{PCI}$  (19.9 mg, 0.09 mmol, 1 equiv),  $\text{PhSiH}_3$  (9.7 mg, 0.09 mmol, 1 equiv) and  $[\text{CPh}_3][\text{B}(\text{C}_6\text{F}_5)_4]$  (4.2 mg, 0.005 mmol, 0.5 equiv) were dissolved in *o*DFB (0.6 mL) in a J-Young tube and heated to 30°C. The reaction progress was followed by  $^{31}\text{P}$  NMR spectroscopy. After 17 hours no conversion of  $\text{Ph}_2\text{PCI}$  was observed.

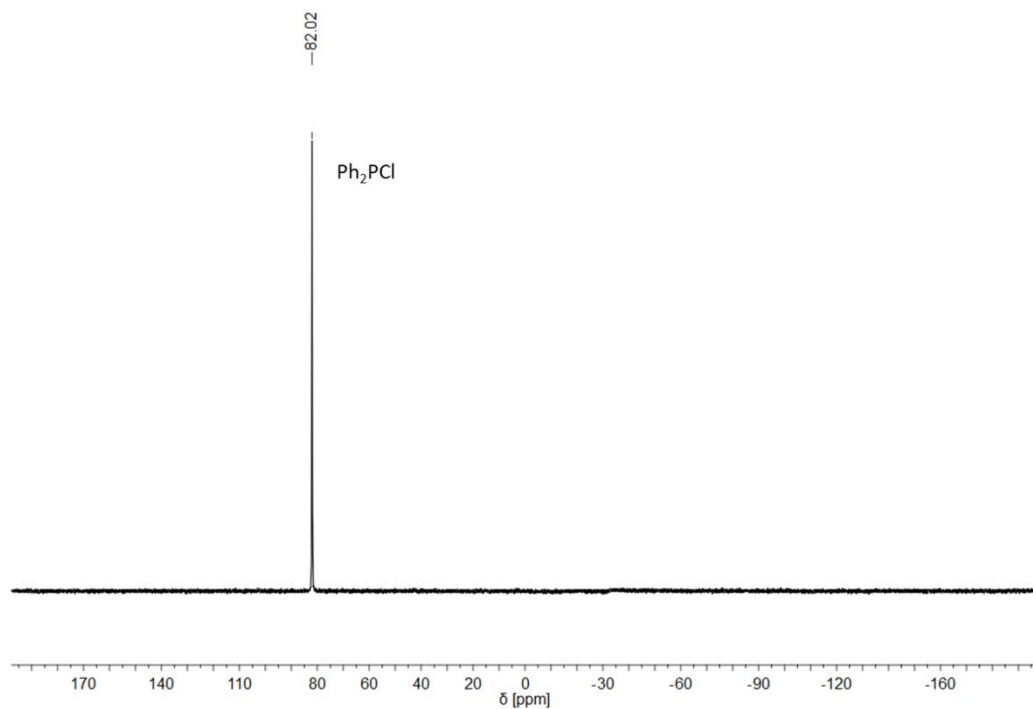

Figure S 121:  $^{31}\text{P}$  NMR spectrum of the reaction of  $\text{Ph}_2\text{PCI}$  with  $\text{PhSiH}_3$  in the presence of  $[\text{CPh}_3][\text{B}(\text{C}_6\text{F}_5)_4]$  (30 °C, *o*DFB, 17 h).

### 3.8.2 With Et<sub>3</sub>SiH

Ph<sub>2</sub>PCl (17.7 mg, 0.08 mmol, 1 equiv), Et<sub>3</sub>SiH (9.3 mg, 0.08 mmol, 1 equiv) and [CPh<sub>3</sub>][B(C<sub>6</sub>F<sub>5</sub>)<sub>4</sub>] (3.7 mg, 0.004 mmol, 0.5 equiv) were dissolved in 1,2-dichloroethane (0.6 mL) in a J-Young tube and heated to 30°C. The reaction progress was followed by <sup>31</sup>P NMR spectroscopy. After 3 hours no conversion of Ph<sub>2</sub>PCl was observed.

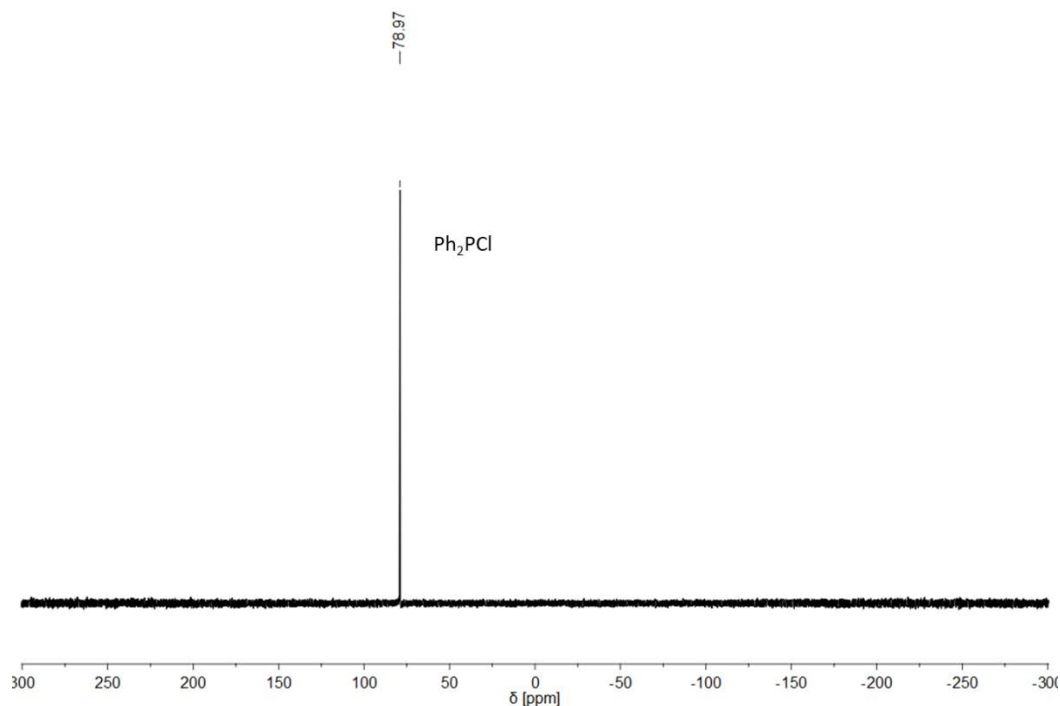

Figure S 122: <sup>31</sup>P NMR spectrum of the reaction of Ph<sub>2</sub>PCl with Et<sub>3</sub>SiH in the presence of [CPh<sub>3</sub>][B(C<sub>6</sub>F<sub>5</sub>)<sub>4</sub>] (30 °C, 1,2-dichloroethane, 3 h).

## 4. Larger scale reactions

### 4.1 Synthesis of Ph<sub>4</sub>P<sub>2</sub> by 9-BBN catalysis

Ph<sub>2</sub>PCl (551.6 mg, 2.5 mmol, 1 equiv) and PhSiH<sub>3</sub> (270.6 mg, 2.5 mmol, 1 equiv) were dissolved in MeCN/*o*DFB (16 mL, 2/1, VV) and added to 9-BBN (15.3 mg, 0.13 mmol, 0.05 equiv) and the mixture was placed in a Schlenk tube. The mixture was heated to 30°C for 24 hours (open to the Schlenk line for pressure release, H<sub>2</sub> formation). After 24 hours all volatiles were removed and the mixture was washed with pentane (2 x 2 mL). The remaining colourless powder was dried under vacuum to afford 81% (375 mg, 1 mmol) of Ph<sub>4</sub>P<sub>2</sub>. <sup>1</sup>H NMR (C<sub>6</sub>D<sub>6</sub>) δ = 7.57-7.51 (m, 8H), 6.97-6.94 (m, 12H) ppm. <sup>31</sup>P NMR (C<sub>6</sub>D<sub>6</sub>) δ = -14.9 (s) ppm. <sup>13</sup>C NMR (C<sub>6</sub>D<sub>6</sub>) δ = 136.6 (m), 134.8 (t, J<sub>CP</sub> = 12.9 Hz), 128.9, 128.6 (t, J<sub>CP</sub> = 3.33 Hz) ppm.



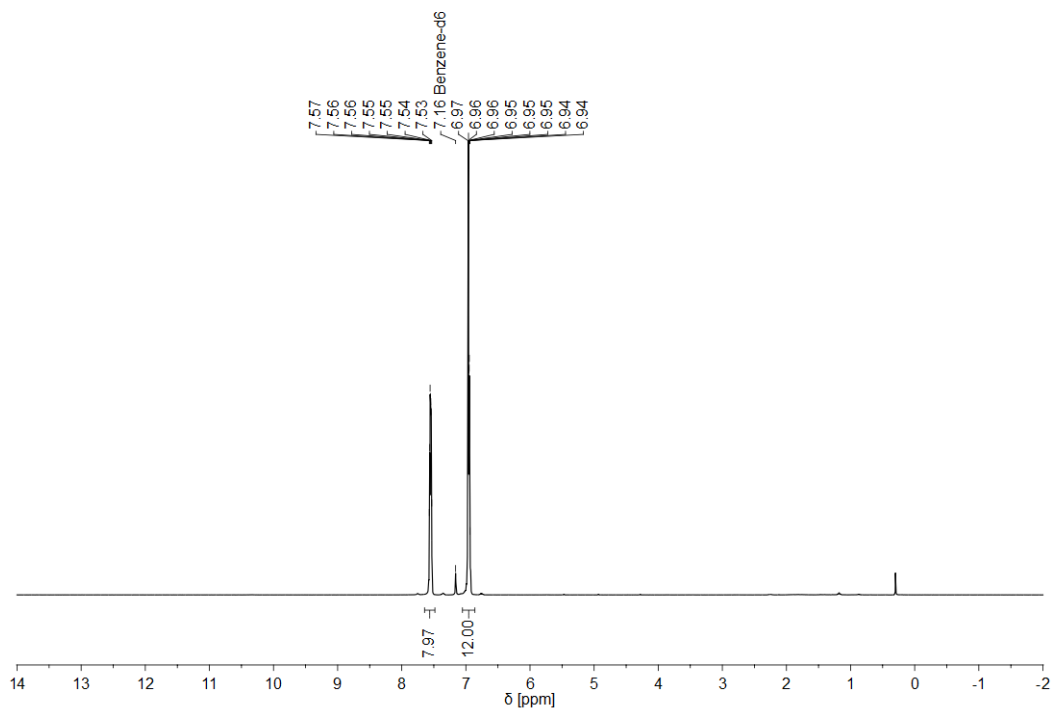

Figure S 123:  $^1\text{H}$  NMR spectrum of  $\text{Ph}_4\text{P}_2$  synthesized from  $\text{Ph}_2\text{P}(\text{Cl})$  and  $\text{PhSiH}_3$  by 9-BBN catalysis ( $\text{C}_6\text{D}_6$ ).

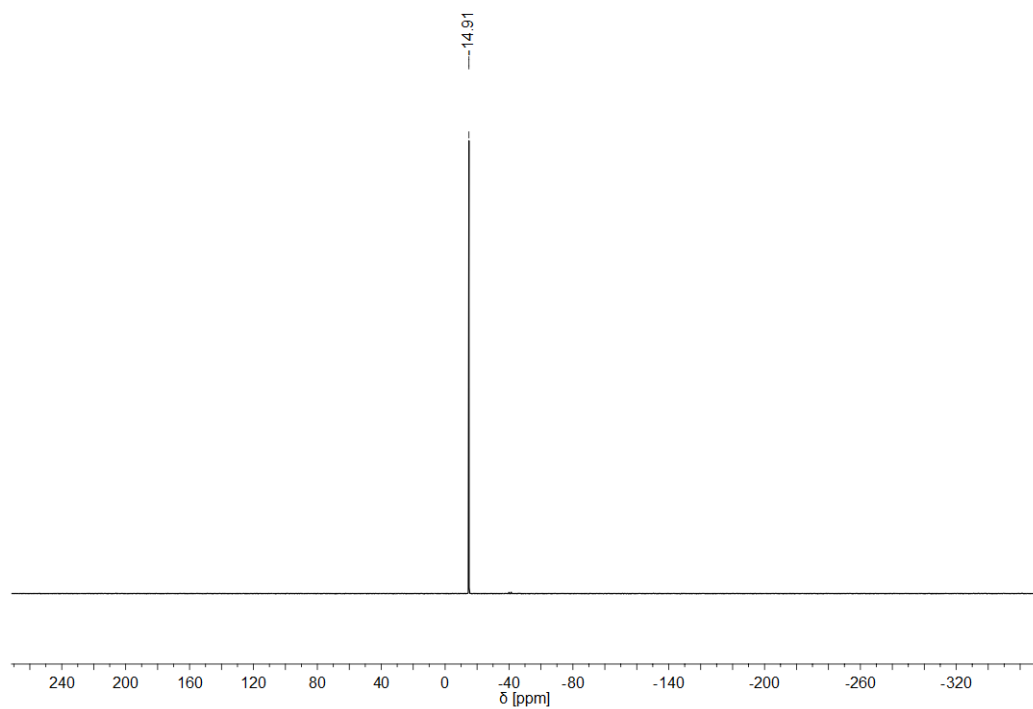

Figure S 124:  $^{31}\text{P}$  NMR spectrum of  $\text{Ph}_4\text{P}_2$  synthesized from  $\text{Ph}_2\text{P}(\text{Cl})$  and  $\text{PhSiH}_3$  by 9-BBN catalysis ( $\text{C}_6\text{D}_6$ ).

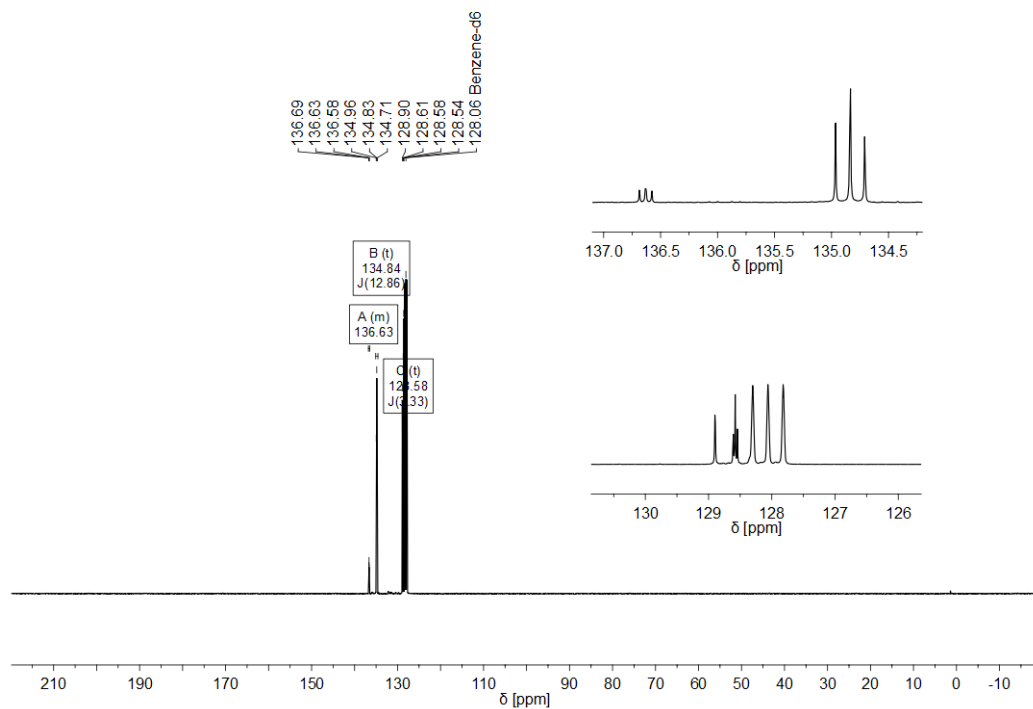

Figure S 125:  $^{13}\text{C}$  NMR spectrum of  $\text{Ph}_4\text{P}_2$  synthesized from  $\text{Ph}_2\text{P}(\text{Cl})$  and  $\text{PhSiH}_3$  by 9-BBN catalysis ( $\text{C}_6\text{D}_6$ ).

#### 4.2 Synthesis of $(o\text{-MeC}_6\text{H}_4)_4\text{P}_2$ by 9-BBN/ $[\text{Et}_4\text{N}]\text{Cl}$ catalysis

$(o\text{-MeC}_6\text{H}_4)_2\text{P}(\text{Cl})$  (174.1 mg, 0.7 mmol, 1 equiv) and  $\text{PhSiH}_3$  (75.8 mg, 0.7 mmol, 1 equiv) were dissolved in MeCN/oDFB (4.5 mL, 1/2, V/V) and added to 9-BBN (4.3 mg, 0.04 mmol, 0.05 equiv) and  $[\text{Et}_4\text{N}]\text{Cl}$  (5.8 mg, 0.04 mmol, 0.05 equiv). The mixture was placed in a Schlenk tube and stirred at room temperature for two hours (open to the Schlenk line for pressure release,  $\text{H}_2$  formation). After two hours all volatiles were removed. The residue was washed with *n*-pentane (2x2 mL), then with toluene (2 mL) and the washings discarded. The remaining colorless solid was dried under vacuum to afford  $(o\text{-MeC}_6\text{H}_4)_4\text{P}_2$  in 74 % yield (110 mg, 0.26 mmol).  $^1\text{H}$  NMR ( $\text{CDCl}_3$ )  $\delta$  = 7.41 (d,  $^3J_{\text{HH}}$  = 7.46 Hz, 4H), 7.07 (t,  $^3J_{\text{HH}}$  = 7.46 Hz, 4H), 6.96 (t,  $^3J_{\text{HH}}$  = 7.47 Hz, 4H), 6.92-6.90 (m, 4H), 1.83 (s, 12H) ppm.  $^{31}\text{P}$  NMR ( $\text{CDCl}_3$ )  $\delta$  = -35.8 ppm.  $^{13}\text{C}$  NMR ( $\text{CDCl}_3$ )  $\delta$  = 143.2 (t,  $J_{\text{PC}}$  = 13.44), 135.3 ( $J_{\text{PC}}$  = 5.1 Hz), 129.9 (t,  $J_{\text{PC}}$  = 2.5 Hz), 128.7, 125.8, 20.9 (t,  $J_{\text{CP}}$  = 9.4 Hz) ppm.

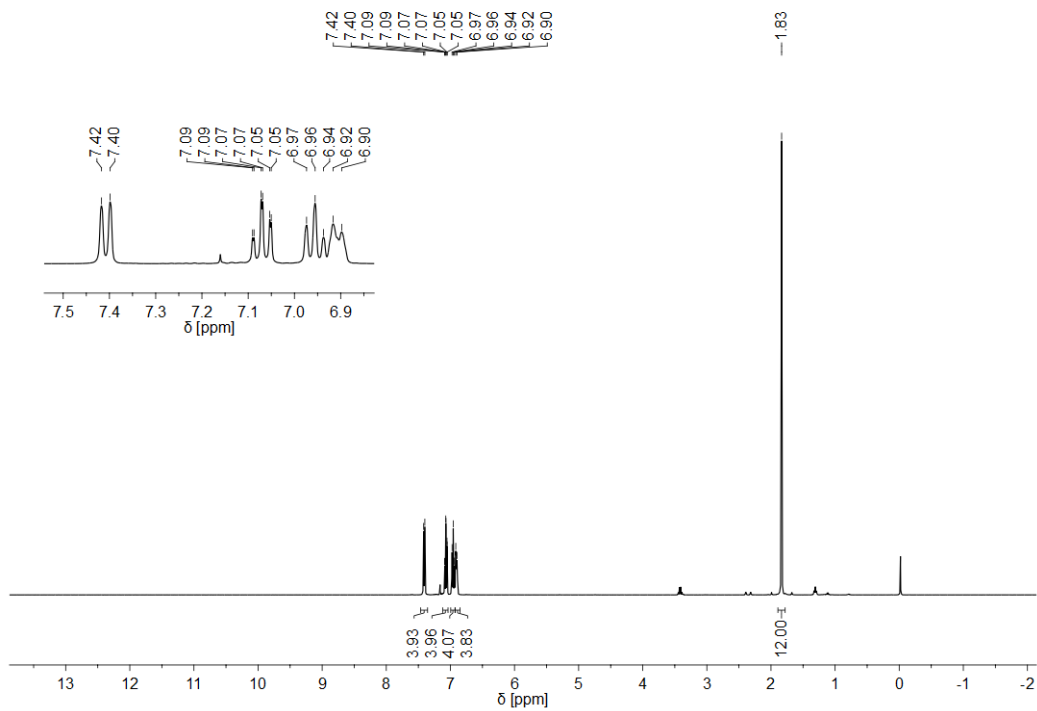

Figure S 126:  $^1\text{H}$  NMR spectrum of  $(o\text{-MeC}_6\text{H}_4)_4\text{P}_2$  synthesized from  $(o\text{-MeC}_6\text{H}_4)_2\text{PCl}$  and  $\text{PhSiH}_3$  by 9-BBN/ $[\text{Et}_4\text{N}]\text{Cl}$  catalysis ( $\text{CDCl}_3$ ).

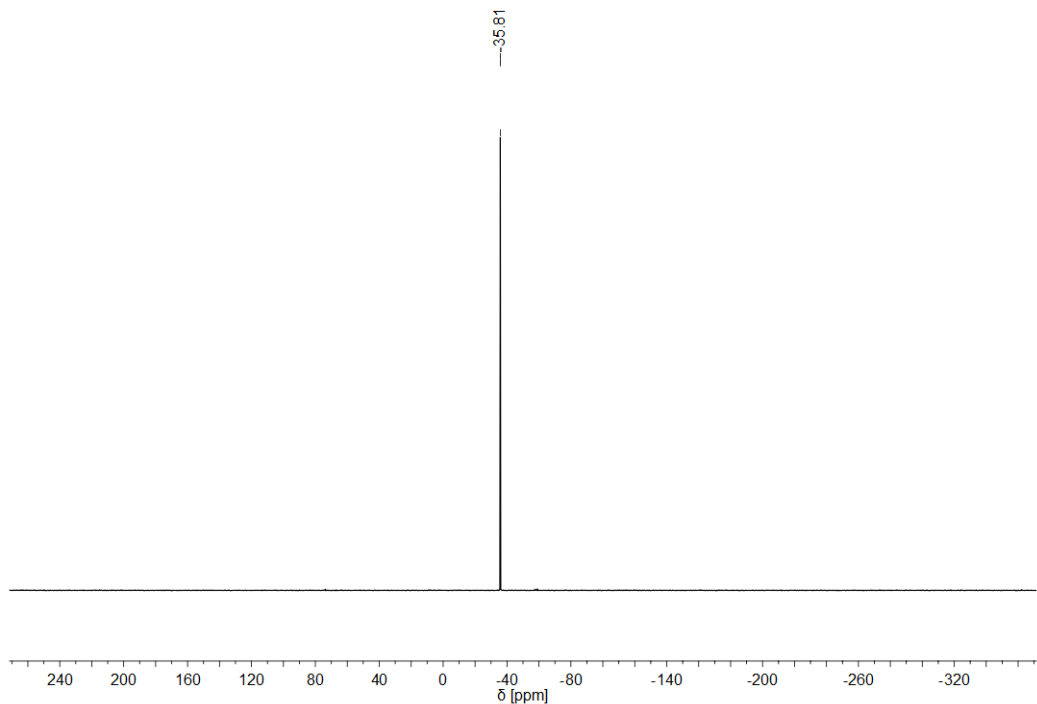

Figure S 127:  $^{31}\text{P}$  NMR spectrum of  $(o\text{-MeC}_6\text{H}_4)_4\text{P}_2$  synthesized from  $(o\text{-MeC}_6\text{H}_4)_2\text{PCl}$  and  $\text{PhSiH}_3$  by 9-BBN/ $[\text{Et}_4\text{N}]\text{Cl}$  catalysis ( $\text{CDCl}_3$ ).

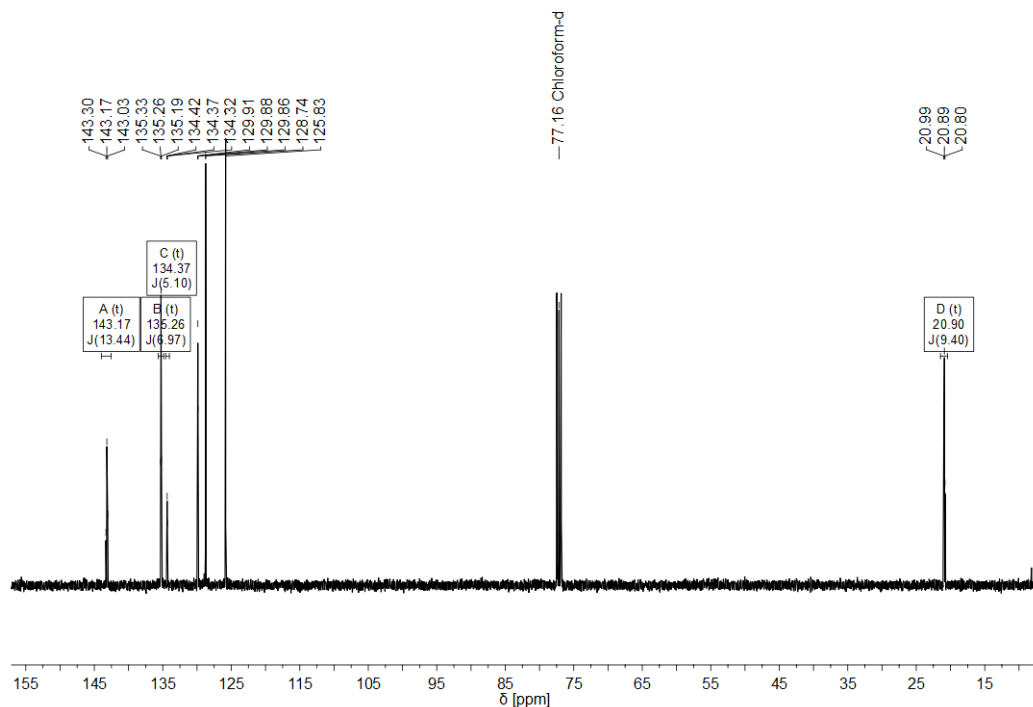

Figure S 128:  $^{13}\text{C}$  NMR spectrum of  $(o\text{-MeC}_6\text{H}_4)_4\text{P}_2$  synthesized from  $(o\text{-MeC}_6\text{H}_4)_2\text{PCl}$  and  $\text{PhSiH}_3$  by 9-BBN/ $[\text{Et}_4\text{N}]\text{Cl}$  catalysis ( $\text{CDCl}_3$ ).

#### 4.3 Synthesis of $(o\text{-NMe}_2\text{C}_6\text{H}_4)_4\text{P}_2$ by 9-BBN/ $[\text{Et}_4\text{N}]\text{Cl}$ catalysis

$(o\text{-NMe}_2\text{C}_6\text{H}_4)_2\text{PCl}$  (55.2 mg, 0.18 mmol, 1 equiv) and  $\text{PhSiH}_3$  (19.5 mg, 0.018 mmol, 1 equiv) were dissolved in MeCN/oDFB (4.5 mL, 1/2, V/V) and added to 9-BBN (1.1 mg, 0.01 mmol, 0.05 equiv) and  $[\text{Et}_4\text{N}]\text{Cl}$  (1.5 mg, 0.01 mmol, 0.05 equiv). The mixture was placed in a Schlenk tube and stirred at room temperature for four hours (open to the Schlenk line for pressure release,  $\text{H}_2$  formation). After four hours all volatiles were removed. The residue was washed with *n*-pentane (2x2 mL) and the washings discarded. The remaining colorless solid was dried under vacuum to afford  $(o\text{-NMe}_2\text{C}_6\text{H}_4)_4\text{P}_2$  in 77 % yield (38 mg, 0.07 mmol).  $^1\text{H}$  NMR ( $\text{CDCl}_3$ )  $\delta$  = 7.56 (dd,  $^3J_{\text{HH}}$  = 7.6;  $^4J_{\text{HH}}$  = 1.5 Hz,  $\text{H}_{\text{ar}}$ , 4H), 7.12 (ddd,  $^3J_{\text{HH}}$  = 7.8; 7.8;  $^4J_{\text{HH}}$  = 1.54 Hz,  $\text{H}_{\text{ar}}$ , 4H), 6.95 (m,  $\text{H}_{\text{ar}}$ , 4H), 6.88 (m,  $\text{H}_{\text{ar}}$ , 4H), 2.38 (s, 12H,  $\text{NMe}_2$ ) ppm.  $^{31}\text{P}$  NMR ( $\text{CDCl}_3$ )  $\delta$  = -34.1 (s) ppm.  $^{13}\text{C}$  NMR ( $\text{CDCl}_3$ )  $\delta$  = 157.9 (m,  $\text{C}_{\text{ar}}$ ), 136.5 (t, JCP = 7.33 Hz,  $\text{C}_{\text{ar}}$ ), 136.1 (m,  $\text{C}_{\text{ar}}$ ), 128.8 (s,  $\text{C}_{\text{ar}}$ ), 124.0 (s,  $\text{C}_{\text{ar}}$ ), 120.3 (m,  $\text{C}_{\text{ar}}$ ), 45.2 (t,  $^4J_{\text{CP}}$  = 1.2 Hz) ppm.

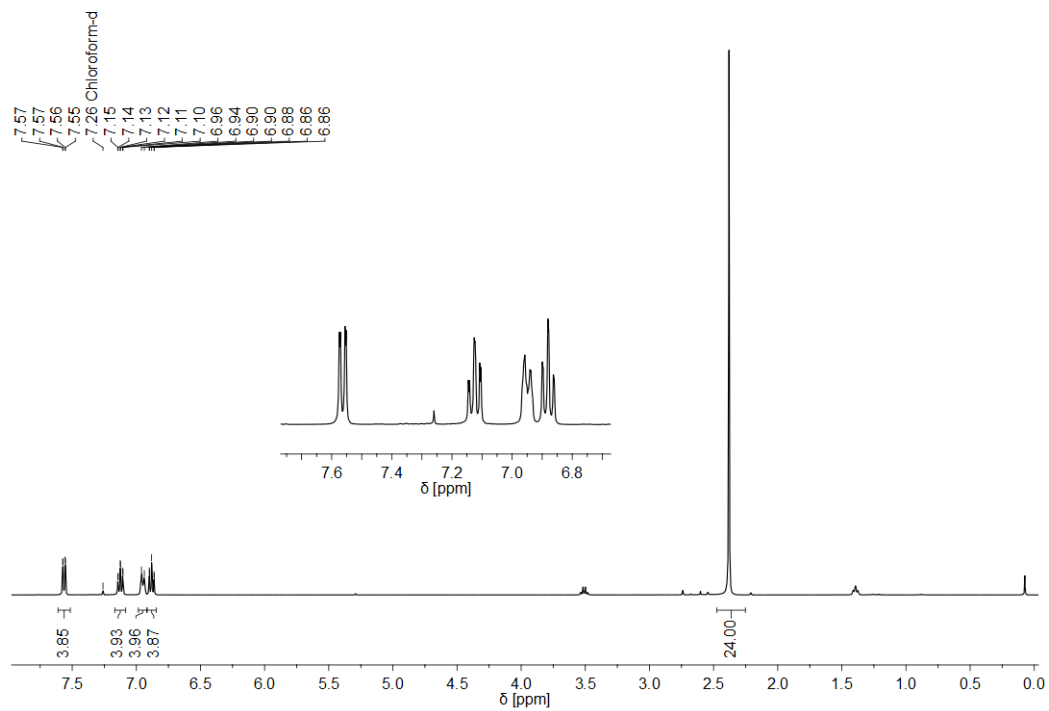

Figure S 129:  $^1\text{H}$  NMR spectrum of  $(o\text{-NMe}_2\text{C}_6\text{H}_4)_4\text{P}_2$  synthesized from  $(o\text{-OMeC}_6\text{H}_4)_2\text{PCl}$  and  $\text{PhSiH}_3$  by 9-BBN/ $[\text{Et}_4\text{N}]\text{Cl}$  catalysis ( $\text{CDCl}_3$ ).

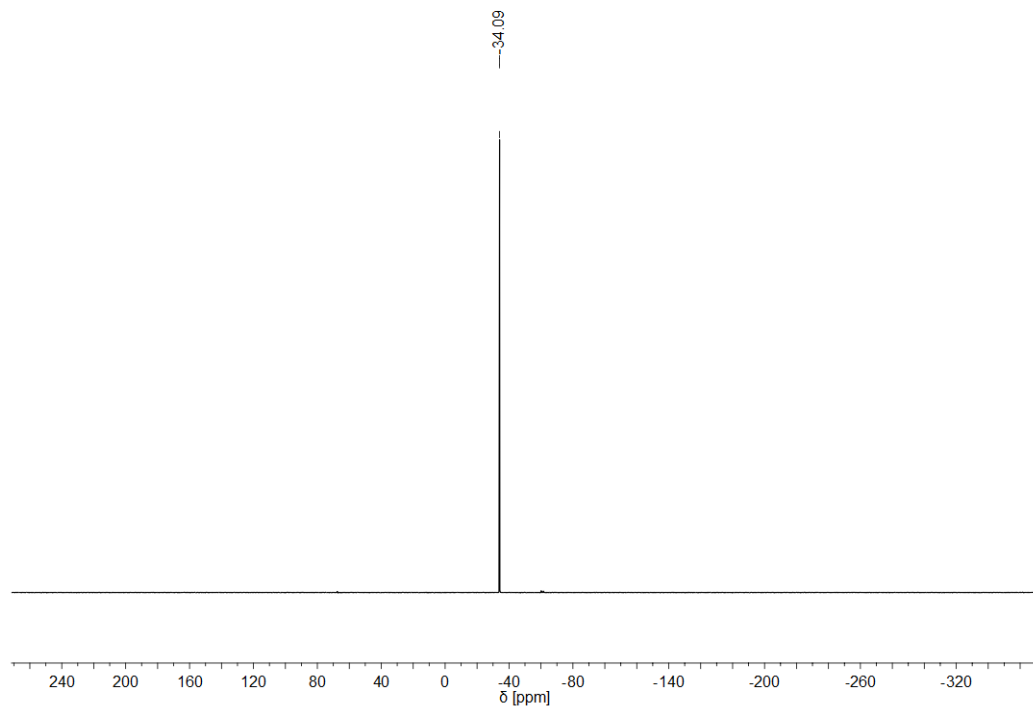

Figure S 130:  $^{31}\text{P}$  NMR spectrum of  $(o\text{-NMe}_2\text{C}_6\text{H}_4)_4\text{P}_2$  synthesized from  $(o\text{-OMeC}_6\text{H}_4)_2\text{PCl}$  and  $\text{PhSiH}_3$  by 9-BBN/ $[\text{Et}_4\text{N}]\text{Cl}$  catalysis ( $\text{CDCl}_3$ ).

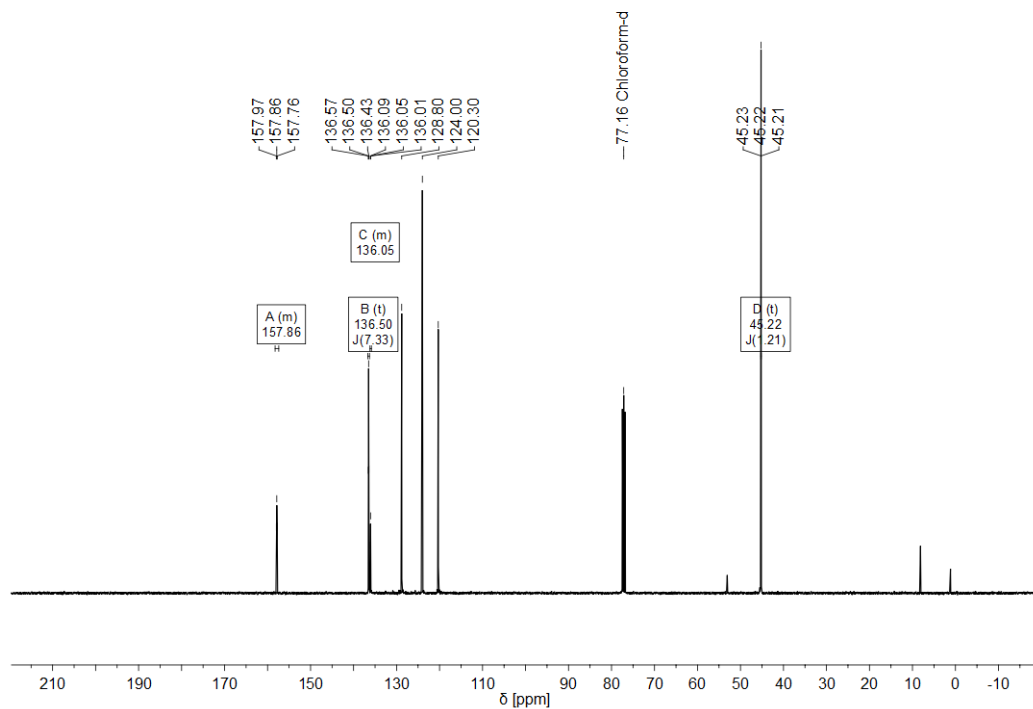

Figure S 131:  $^{13}\text{C}$  NMR spectrum of  $(o\text{-NMe}_2\text{C}_6\text{H}_4)_4\text{P}_2$  synthesized from  $(o\text{-OMeC}_6\text{H}_4)_2\text{PCl}$  and  $\text{PhSiH}_3$  by 9-BBN/ $[\text{Et}_4\text{N}]\text{Cl}$  catalysis ( $\text{CDCl}_3$ ).

#### 4.4 Synthesis of $(o\text{-OMeC}_6\text{H}_4)_4\text{P}_2$ by 9-BBN/ $[\text{Et}_4\text{N}]\text{Cl}$ catalysis

$(o\text{-OMeC}_6\text{H}_4)_2\text{PCl}$  (50.5 mg, 0.18 mmol, 1 equiv) and  $\text{PhSiH}_3$  (19.7 mg, 0.18 mmol, 1 equiv) were dissolved in MeCN/*o*DFB (1.5 mL, 1/2, V/V) and added to 9-BBN (1.2 mg, 0.01 mmol, 0.05 equiv) and  $[\text{Et}_4\text{N}]\text{Cl}$  (1.5 mg, 0.01 mmol, 0.05 equiv). The mixture was placed in a Schlenk tube and stirred at room temperature for two hours (open to the Schlenk line for pressure release,  $\text{H}_2$  formation). After two hours all volatiles were removed. The residue was washed with *n*-pentane (2x2 mL), filtered over a filter pipet and the washings discarded. The filter cake was dissolved in dichloromethane (2 mL) and again filtered. The filtrate was evaporated to dryness and the remaining colorless solid was dried under vacuum to afford  $(o\text{-OMeC}_6\text{H}_4)_4\text{P}_2$  in quantitative yield (44 mg, 0.09 mmol).  $^1\text{H}$  NMR ( $\text{CDCl}_3$ )  $\delta$  = 7.60 (dd,  $^3J_{\text{HH}}$  = 7.51,  $^3J_{\text{HP}}$  = 1.62 Hz, 4H), 7.15 (m, 4H), 6.81 (t,  $^3J_{\text{HH}}$  = 7.3 Hz, 4H), 6.55 (m, 4H), 3.47 (s, OMe, 12H) ppm.  $^{31}\text{P}\{^1\text{H}\}$  NMR ( $\text{CDCl}_3$ )  $\delta$  = -46.8 ppm.  $^{13}\text{C}$  NMR ( $\text{CDCl}_3$ )  $\delta$  = 161.1 (t,  $J_{\text{CP}}$  = 9.18 Hz), 135.4 (t,  $J_{\text{CP}}$  = 8.44 Hz), 129.4, 123.8 (t,  $J_{\text{CP}}$  = 5.0 Hz), 120.3, 109.4, 55.2 ppm.

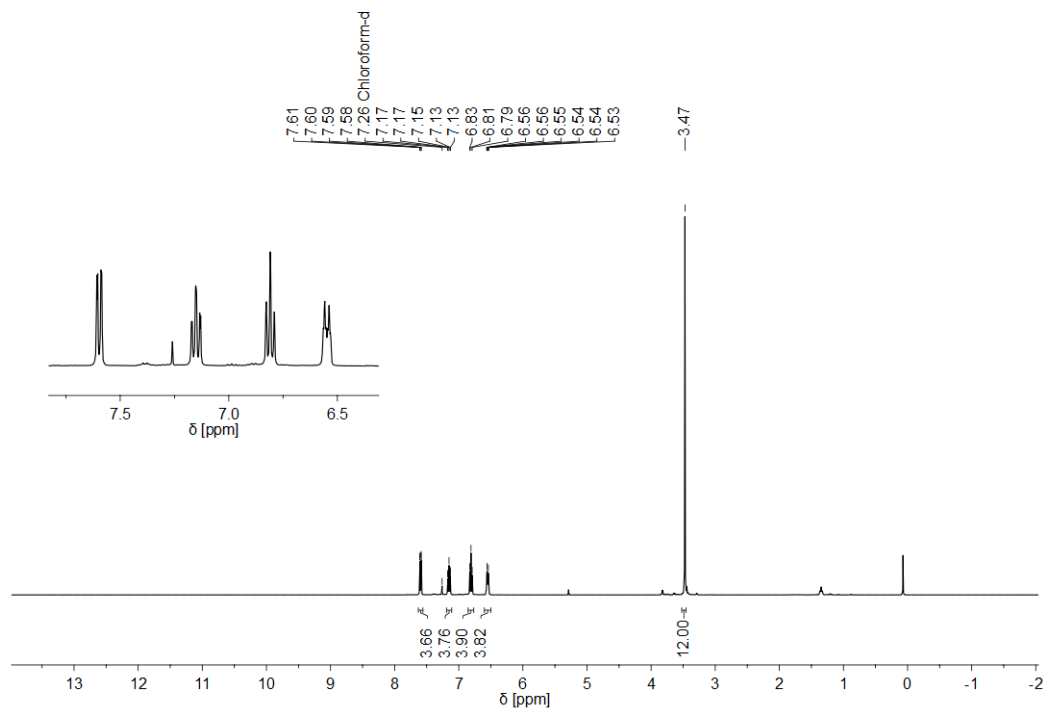

Figure S 132:  $^1\text{H}$  NMR spectrum of  $(o\text{-OMeC}_6\text{H}_4)_4\text{P}_2$  synthesized from  $(o\text{-OMeC}_6\text{H}_4)_2\text{PCl}$  and  $\text{PhSiH}_3$  by 9-BBN/ $[\text{Et}_4\text{N}]\text{Cl}$  catalysis ( $\text{CDCl}_3$ ).

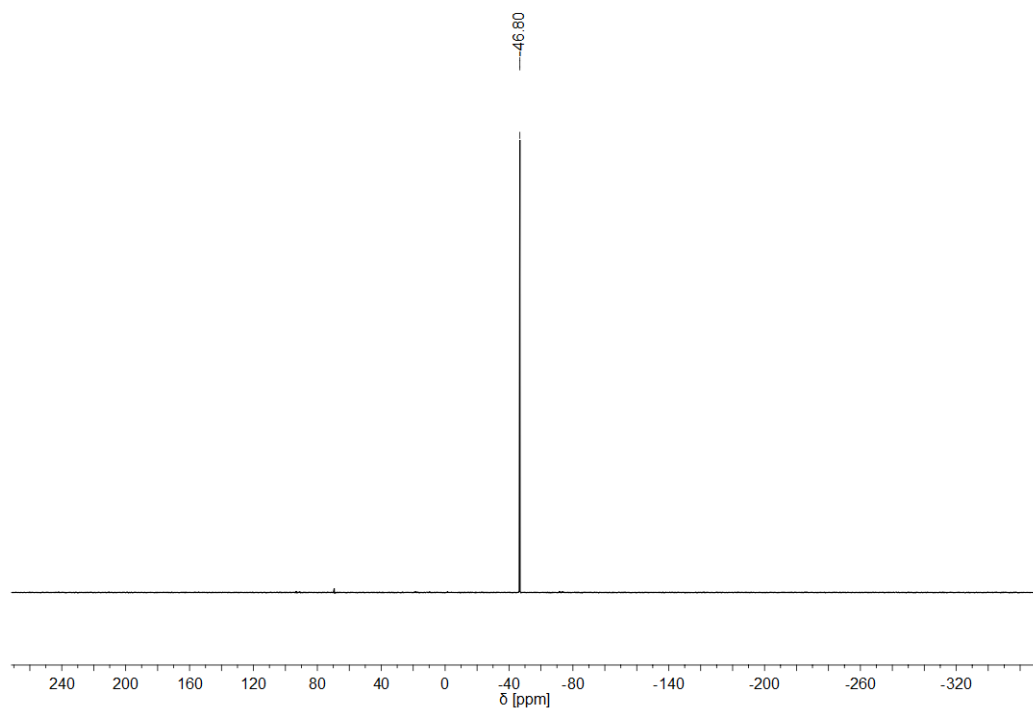

Figure S 133:  $^{31}\text{P}\{^1\text{H}\}$  NMR spectrum of  $(o\text{-OMeC}_6\text{H}_4)_4\text{P}_2$  synthesized from  $(o\text{-OMeC}_6\text{H}_4)_2\text{PCl}$  and  $\text{PhSiH}_3$  by 9-BBN/ $[\text{Et}_4\text{N}]\text{Cl}$  catalysis ( $\text{CDCl}_3$ ).

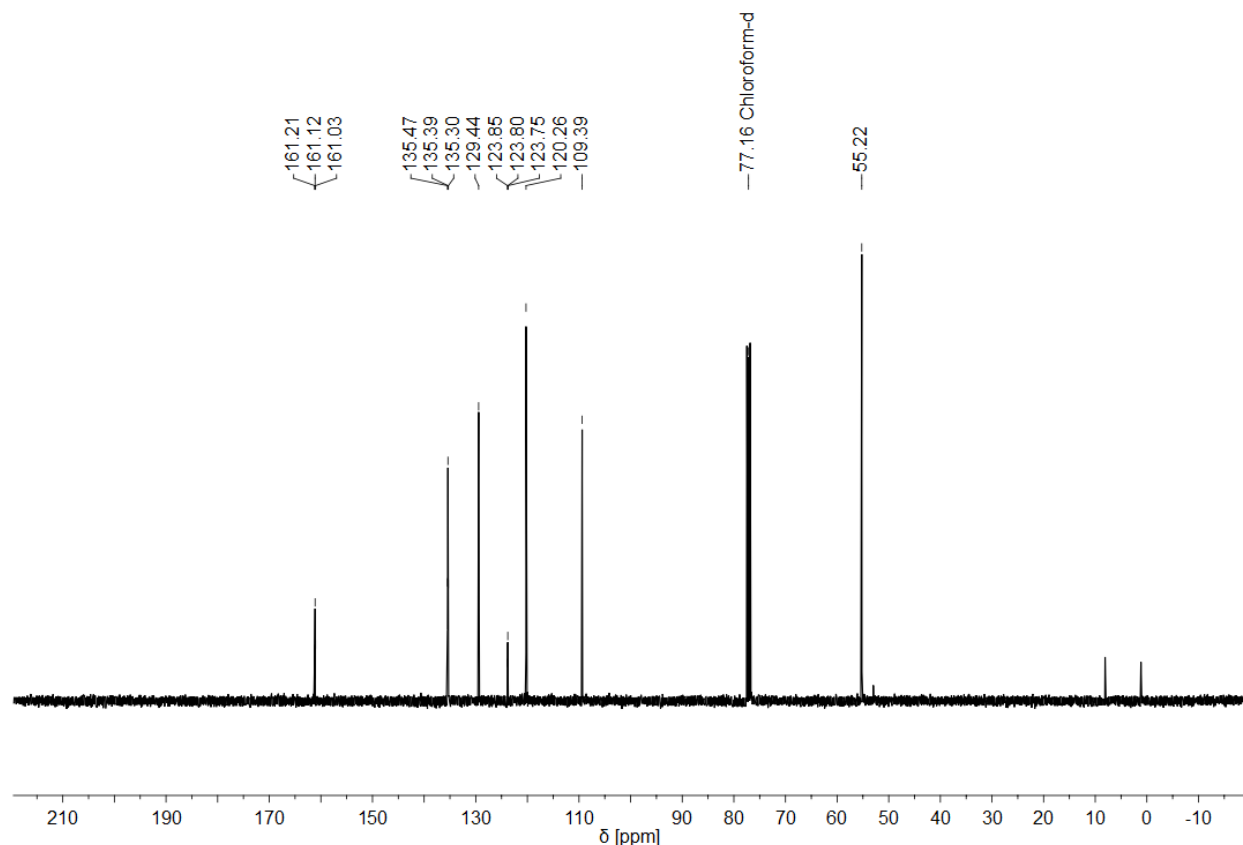

Figure S 134:  $^{13}\text{C}$  NMR spectrum of  $(o\text{-OMeC}_6\text{H}_4)_4\text{P}_2$  synthesized from  $(o\text{-OMeC}_6\text{H}_4)_2\text{PCl}$  and  $\text{PhSiH}_3$  by 9-BBN/ $[\text{Et}_4\text{N}]\text{Cl}$  catalysis ( $\text{CDCl}_3$ ).

#### 4.5 Synthesis of $(2,4,6\text{-Me}_3\text{-C}_6\text{H}_2)_2\text{PH}$ by 9-BBN/ $[\text{Et}_4\text{N}]\text{Cl}$ catalysis

$(2,4,6\text{-Me}_3\text{-C}_6\text{H}_2)_2\text{PCl}$  (54.9 mg, 0.18 mmol, 1 equiv),  $\text{PhSiH}_3$  (19.5 mg, 0.18 mmol, 1 equiv), 9-BBN (1.1 mg, 0.01 mmol, 0.05 equiv) and  $[\text{Et}_4\text{N}]\text{Cl}$  (1.5 mg, 0.01 mmol, 0.05 equiv) were dissolved in a mixture of MeCN/*o*DFB (1.5 mL, 1/2, V/V) and heated to 30 °C in a Schlenk tube. After 2 hours the volatiles were removed under vacuum. The remaining residue was dissolved in toluene and filtered over glass fiber filter paper. The filtrate was evaporated to dryness to afford  $(2,4,6\text{-Me}_3\text{-C}_6\text{H}_2)_2\text{PH}$  in 76 % yield (37 mg, 0.14 mmol)  $^1\text{H}$  NMR ( $\text{C}_6\text{D}_6$ )  $\delta$  = 6.70 (s, 4H,  $\text{C}_6\text{Me}_3\text{H}_2$ ), 5.32 (d,  $^1J_{\text{PH}}$  = 229.5 Hz, PH), 2.27 (*o*- $\text{CH}_3$ , Mes), 2.08, (s, *p*- $\text{CH}_3$ , Mes) ppm.  $^{31}\text{P}\{^1\text{H}\}$  NMR ( $\text{C}_6\text{D}_6$ )  $\delta$  = -93.2 (d,  $^1J_{\text{PH}}$  = 229.5 Hz) ppm.  $^{13}\text{C}$  NMR ( $\text{C}_6\text{D}_6$ )  $\delta$  = 142.4 (d,  $J_{\text{CP}}$  = 12.35 Hz), 137.8, 130.0 (d,  $J_{\text{CP}}$  = 16.6 Hz), 129.6 (d,  $J_{\text{CP}}$  = 29 Hz), 23.0 (d,  $J_{\text{CP}}$  = 11.0 Hz), 21.0 ppm.



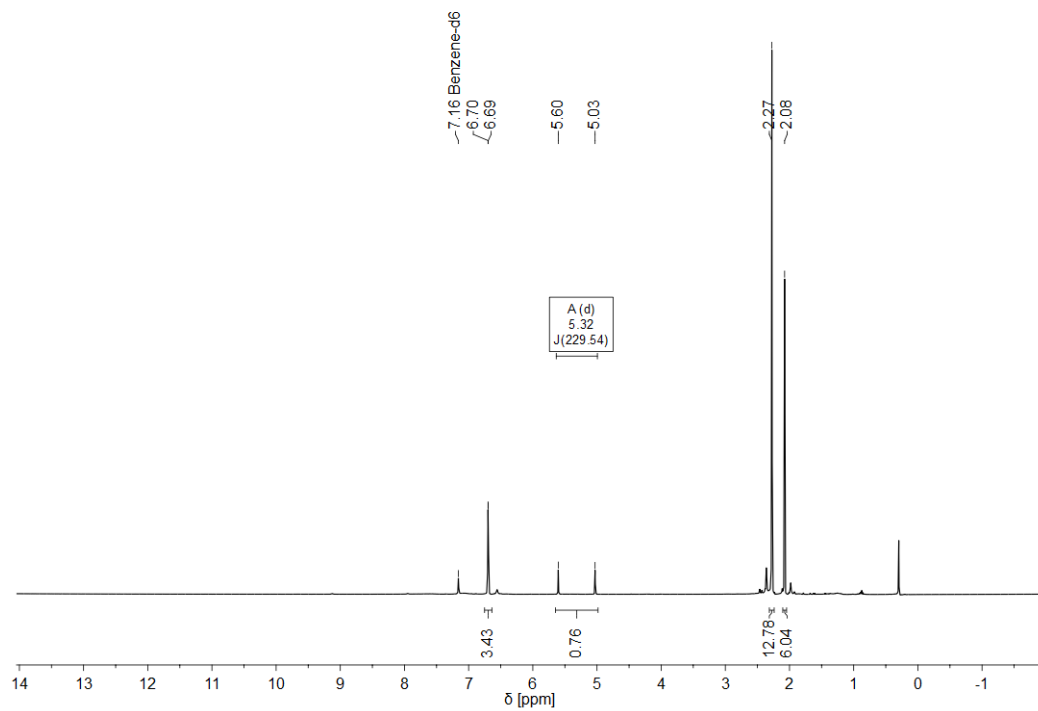

Figure S 135:  $^1\text{H}$  NMR spectrum of  $\text{Mes}_2\text{PH}$  synthesized from  $\text{Mes}_2\text{PCl}$  and  $\text{PhSiH}_3$  by 9-BBN/ $[\text{Et}_4\text{N}]\text{Cl}$  catalysis ( $\text{C}_6\text{D}_6$ ).

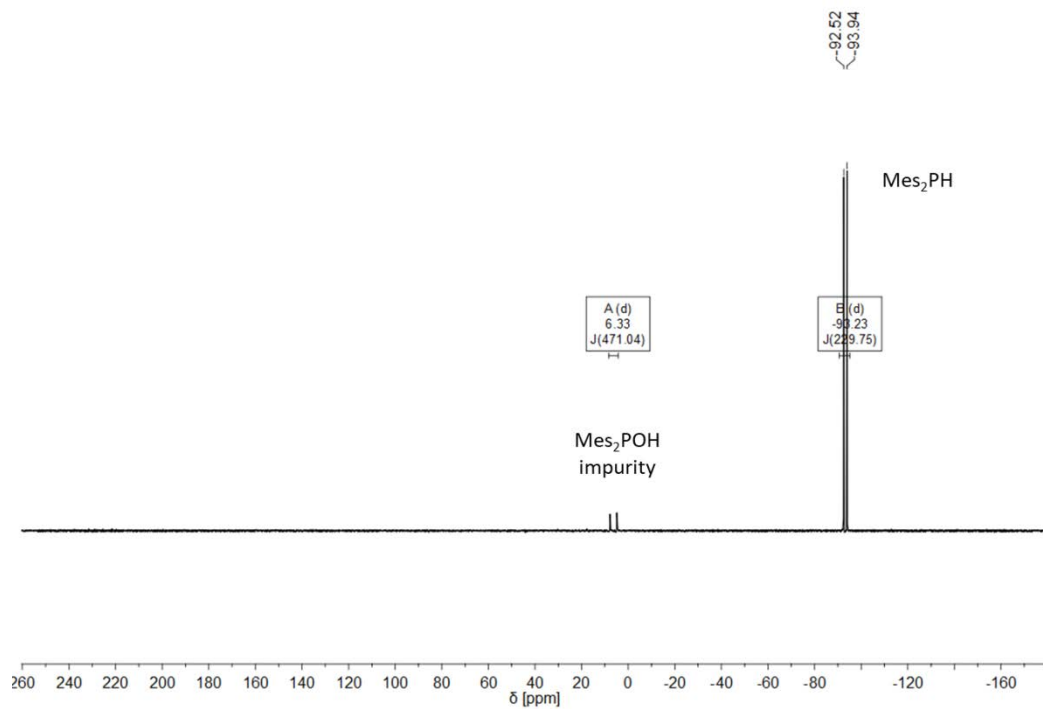

Figure S 136:  $^{31}\text{P}$  NMR spectrum of  $\text{Mes}_2\text{PH}$  synthesized from  $\text{Mes}_2\text{PCl}$  and  $\text{PhSiH}_3$  by 9-BBN/ $[\text{Et}_4\text{N}]\text{Cl}$  catalysis ( $\text{C}_6\text{D}_6$ ).

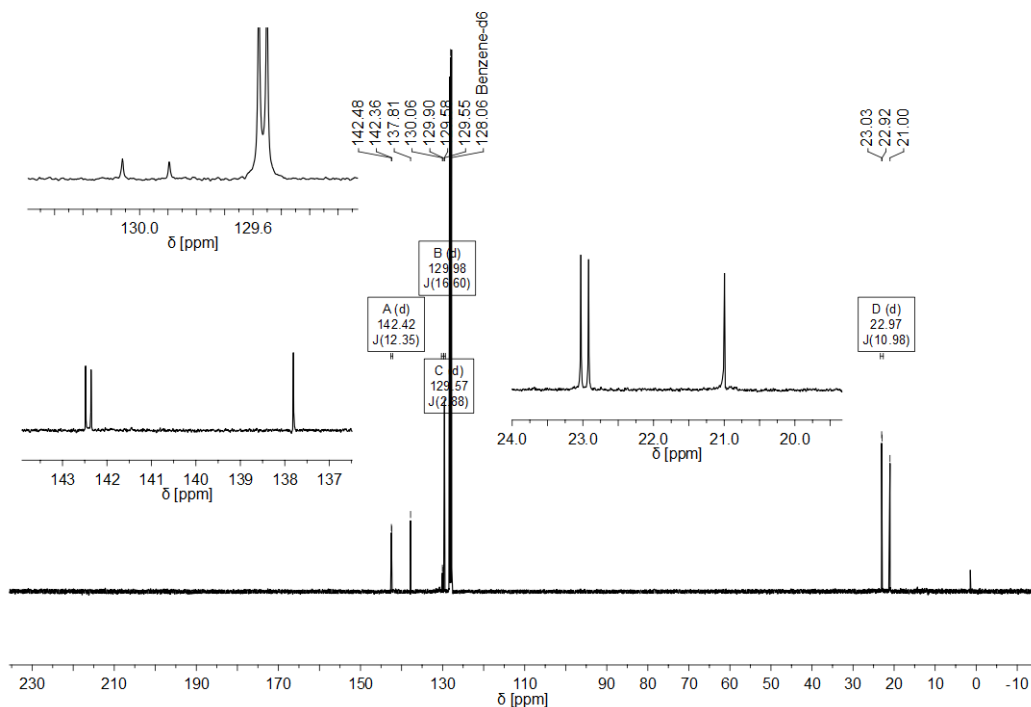

Figure S 137:  $^{13}\text{C}$  NMR spectrum of  $\text{Mes}_2\text{PH}$  synthesized from  $\text{Mes}_2\text{PCl}$  and  $\text{PhSiH}_3$  by 9-BBN/ $[\text{NEt}_4][\text{Cl}]$  catalysis ( $\text{C}_6\text{D}_6$ ).

#### 4.6 Synthesis of $\text{Ph}_2t\text{Bu}_2\text{P}_2$ by 9-BBN/ $[\text{Et}_4\text{N}]\text{Cl}$ catalysis

$\text{Ph}t\text{BuPCl}$  (180.6 mg, 0.9 mmol, 1 equiv),  $\text{PhSiH}_3$  (97.4 mg, 0.9 mmol, 1 equiv), 9-BBN (5.5 mg, 0.05 mmol, 0.05 equiv) and  $[\text{Et}_4\text{N}]\text{Cl}$  (7.5 mg, 0.05 mmol, 0.05 equiv) were dissolved in oDFB/MeCN (6 mL, 2/1, V/V) and heated to 60 °C for 8 hours. After 8 hours the volatiles were removed and the resulting residue was taken up in *n*-pentane and the solution was filtered. The filtrate was evaporated to dryness to afford  $\text{Ph}_2t\text{Bu}_2\text{P}_2$  in 73% yield (108 mg, 0.33 mmol).  $\text{Ph}_2t\text{Bu}_2\text{P}_2$  was isolated as a mixture of distereomers: 85% major isomer, 15% minor isomer.  $^1\text{H}$  NMR ( $\text{C}_6\text{D}_6$ )  $\delta$  = 8.05-6.84 (m, 10 H, Ph), 1.30 (pseudo triplet, *t*Bu, minor diastereomer, 15%), 0.96 (pseudo triplet, *t*Bu, major isomer, 85%) ppm.  $^{31}\text{P}$  NMR ( $\text{C}_6\text{D}_6$ )  $\delta$  = -2.16 (s, minor isomer, 15%), -4.16 (s, major isomer, 85%) ppm.  $^{13}\text{C}$  NMR ( $\text{C}_6\text{D}_6$ )  $\delta$  = 29.97 (pseudo triplet,  $\text{C}(\text{CH}_3)_3$ , minor isomer), 30.04 (pseudo triplet,  $\text{C}(\text{CH}_3)_3$ , major isomer), 30.9 (m,  $\text{C}(\text{CH}_3)_3$ , minor isomer), 31.8 (pseudo triplet,  $\text{C}(\text{CH}_3)_3$ , major isomer), 127.6 (pseudo triplet,  $\text{C}_{ar}$ , minor isomer), 128.2 (pseudo triplet,  $\text{C}_{ar}$ , major isomer), 128.8 (s,  $\text{C}_{ar}$ , minor isomer), 129.8 (s,  $\text{C}_{ar}$ , major isomer), 133.7 (m,  $\text{C}_{ar}$ , minor isomer), 137.1 (m,  $\text{C}_{ar}$ , minor isomer), 137.6 (pseudo triplet,  $\text{C}_{ar}$ , major isomer), 137.9 (pseudo triplet,  $\text{C}_{ar}$ , major isomer) ppm. Data are similar to data reported in  $\text{CDCl}_3$  from literature.<sup>28</sup>

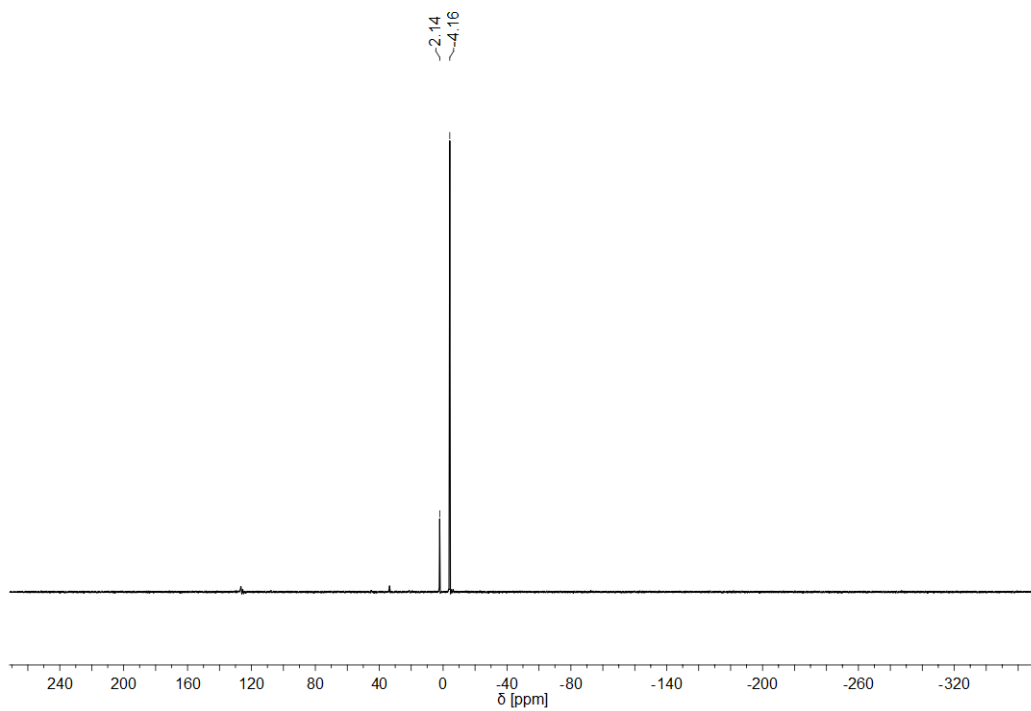

Figure S 138: <sup>31</sup>P NMR spectrum of P<sub>2</sub>Ph<sub>2</sub>tBu<sub>2</sub> synthesized from tBuPhPCI and PhSiH<sub>3</sub> by 9-BBN/[Et<sub>4</sub>N]Cl catalysis (C<sub>6</sub>D<sub>6</sub>).

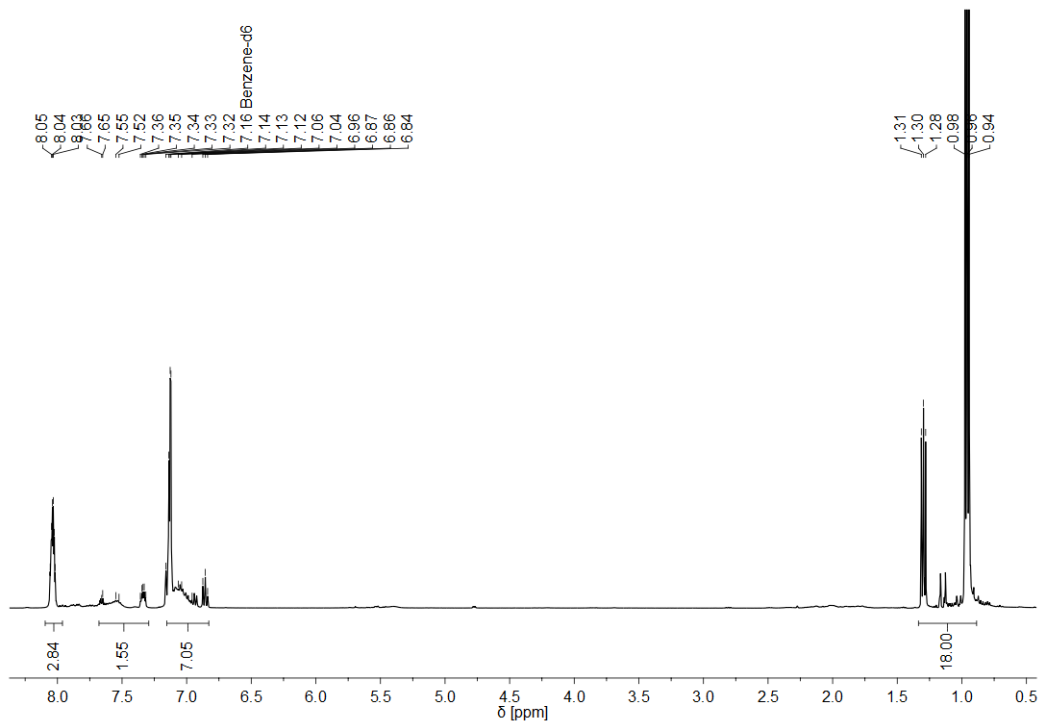

Figure S 139: <sup>1</sup>H NMR spectrum of P<sub>2</sub>Ph<sub>2</sub>tBu<sub>2</sub> synthesized from tBuPhPCI and PhSiH<sub>3</sub> by 9-BBN/[Et<sub>4</sub>N]Cl catalysis (C<sub>6</sub>D<sub>6</sub>).

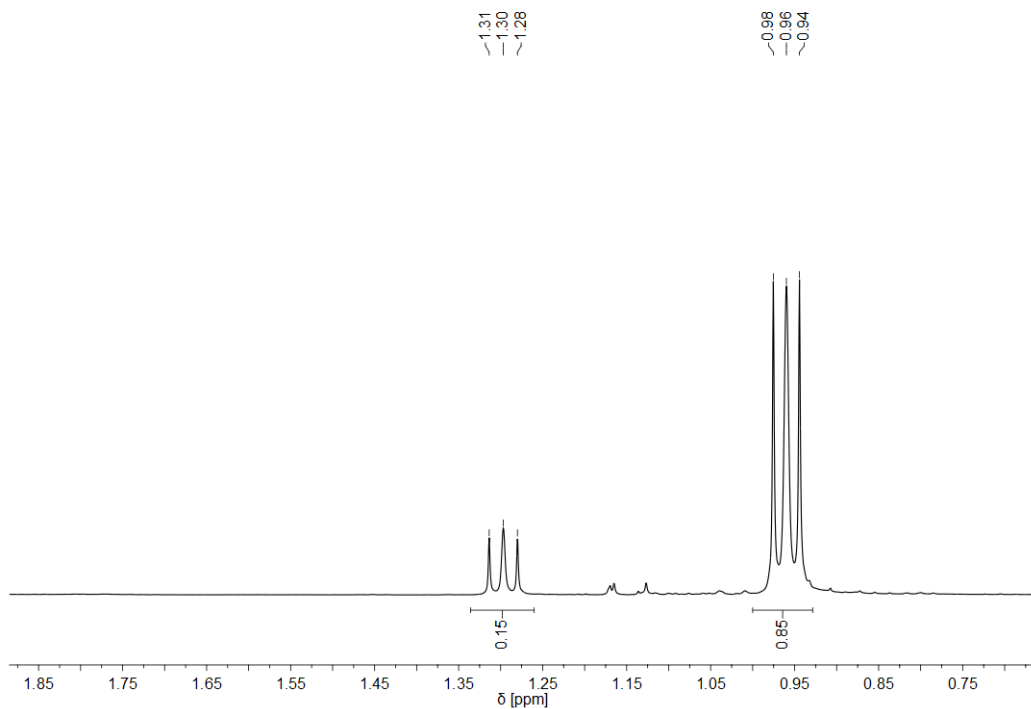

Figure S 140: Detail of  $^1\text{H}$  NMR spectrum of  $\text{P}_2\text{Ph}_2\text{tBu}_2$  synthesized from  $\text{tBuPhPhCl}$  and  $\text{PhSiH}_3$  by 9-BBN/ $[\text{Et}_4\text{N}]\text{Cl}$  catalysis ( $\text{C}_6\text{D}_6$ ).

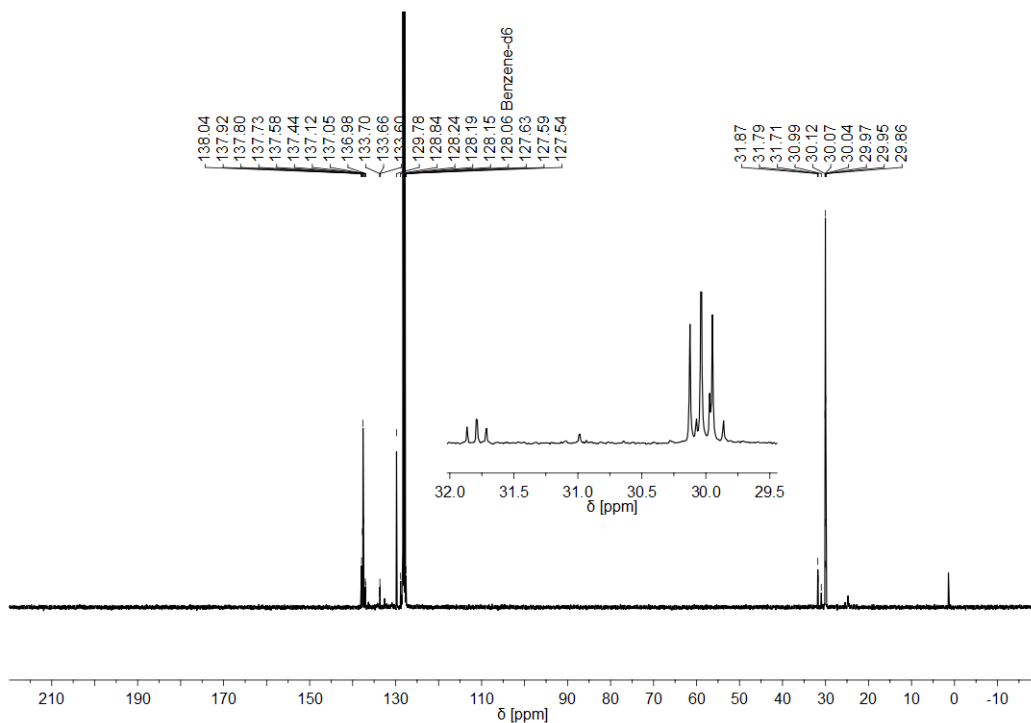

Figure S 141:  $^{13}\text{C}$  NMR spectrum of  $\text{P}_2\text{Ph}_2\text{tBu}_2$  synthesized from  $\text{tBuPhPhCl}$  and  $\text{PhSiH}_3$  by 9-BBN/ $[\text{Et}_4\text{N}]\text{Cl}$  catalysis ( $\text{C}_6\text{D}_6$ ).

## References

1. M. C. MacInnis, R. McDonald and L. Turculet, *Organometallics*, 2011, **30**, 6408-6415.
2. S. Schweizer, J.-M. Becht and C. Le Drian, *Adv. Synth. Catal.*, 2007, **349**, 1150-1158.
3. T. Liu, X. Sun and L. Wu, *Adv. Synth. Catal.*, 2018, **360**, 2005-2012.
4. F. T. Edelmann, *Comments Inorg. Chem.*, 1992, **12**, 259-284.
5. M. Scholz, H. W. Roesky, D. Stalke, K. Keller and F. T. Edelmann, *J. Organomet. Chem.*, 1989, **366**, 73-85.
6. H. C. Brown and S. U. Kulkarni, *J. Organomet. Chem.*, 1979, **168**, 281-293.
7. G. R. Fulmer, A. J. M. Miller, N. H. Sherden, H. E. Gottlieb, A. Nudelman, B. M. Stoltz, J. E. Bercaw and K. I. Goldberg, *Organometallics*, 2010, **29**, 2176-2179.
8. K. G. Pearce, A. M. Borys, E. R. Clark and H. J. Shepherd, *Inorg. Chem.*, 2018, **57**, 11530-11536.
9. R. Köster, G. Seidel, R. Boese and B. Wrackmeyer, *Chem. Ber.*, 1988, **121**, 1955-1966.
10. K. Zhu, P. D. Achord, X. Zhang, K. Krogh-Jespersen and A. S. Goldman, *J. Am. Chem. Soc.*, 2004, **126**, 13044-13053.
11. C. B. Provis-Evans, E. A. C. Emanuelsson and R. L. Webster, *Adv. Synth. Catal.*, 2018, **360**, 3999-4004.
12. L. Wu, V. T. Annibale, H. Jiao, A. Brookfield, D. Collison and I. Manners, *Nat. Commun.*, 2019, **10**, 2786.
13. C. A. Busacca, J. C. Lorenz, N. Grinberg, N. Haddad, M. Hrapchak, B. Latli, H. Lee, P. Sabila, A. Saha, M. Sarvestani, S. Shen, R. Varsolona, X. Wei and C. H. Senanayake, *Org. Lett.*, 2005, **7**, 4277-4280.
14. Z. N. Gafurov, I. y. F. Sakhapov, A. A. Kagilev, A. O. Kantyukov, K. R. Khayarov, O. G. Sinyashin and D. G. Yakhvarov, *Phosphorus, Sulfur, and Silicon and the Related Elements*, 2020, **195**, 726-729.
15. A. K. King, A. Buchard, M. F. Mahon and R. L. Webster, *Chem. Eur. J.*, 2015, **21**, 15960-15963.
16. J. Tong, S. Liu, S. Zhang and S. Z. Li, *Spectrochim Acta A Mol Biomol Spectrosc.*, 2007, **67**, 837-846.
17. S. Molitor, J. Becker and V. H. Gessner, *J. Am. Chem. Soc.*, 2014, **136**, 15517-15520.
18. N. Burford, C. A. Dyker and A. Decken, *Angew. Chem. Int. Ed.*, 2005, **44**, 2364-2367.
19. C. Branfoot, T. A. Young, D. F. Wass and P. G. Pringle, *Dalton Trans.*, 2021, **50**, 7094-7104.
20. K. Oberdorf, A. Hanft, J. Ramler, I. Krummenacher, F. M. Bickelhaupt, J. Poater and C. Lichtenberg, *Angew. Chem. Int. Ed.*, 2021, **60**, 6441-6445.
21. M. K. Rong, K. van Duin, T. van Dijk, J. J. M. de Pater, B.-J. Deelman, M. Nieger, A. W. Ehlers, J. C. Slootweg and K. Lammertsma, *Organometallics*, 2017, **36**, 1079-1090.

22. J. M. Farrell and D. W. Stephan, *Chem. Commun.*, 2015, **51**, 14322-14325.
23. A. G. Sturm, J. I. Schweizer, L. Meyer, T. Santowski, N. Auner and M. C. Holthausen, *Chem. Eur. J.*, 2018, **24**, 17796-17801.
24. C. Douvris, C. M. Nagaraja, C.-H. Chen, B. M. Foxman and O. V. Ozerov, *J. Am. Chem. Soc.*, 2010, **132**, 4946-4953.
25. C. Douvris and O. V. Ozerov, *Science*, 2008, **321**, 1188-1190.
26. V. J. Scott, R. Çelenligil-Çetin and O. V. Ozerov, *J. Am. Chem. Soc.*, 2005, **127**, 2852-2853.
27. H. F. T. Klare, L. Albers, L. Süsse, S. Keess, T. Müller and M. Oestreich, *Chem. Rev.*, 2021, **121**, 5889-5985.
28. J. Heinicke and R. Kadyrov, *J. Organomet. Chem.*, 1996, **520**, 131-137.
